# Supplementary material
Source: publisher figshare collection journal article supplement (https://gsajournals.figshare.com/ndownloader/files/24564845)
Supplement: Supplementary file 1 [file 24564845]

Symbol	UCSC_ID	Chr	First	Last	threeUTR	fiveUTR	Promoter	Intron	Coding	SpliceSite	Lowestp	Medianp	Rank_low	Rank_med
Tbcel	272589	9	42419293	42478817	0	0	0	5	0	0	4.01E-07	4.01E-07	3.5	1
Sorl1	20660	9	41964762	42126225	11	0	13	594	11	0	1.92E-07	6.75E-07	1	2
Mir100	723892	9	41529467	41531572	0	0	12	0	0	0	1.41E-06	3.00E-06	6	3
Mir125b-1	387236	9	41580111	41581386	0	0	6	0	0	0	3.00E-06	3.50E-06	8	4
Mir100hg	73144	9	41329887	41715941	0	0	62	2562	0	0	3.68E-07	3.81E-06	2	5.5
Mirlet7a-2	723965	9	41534854	41536830	0	0	28	0	0	0	1.30E-06	3.81E-06	5	5.5
Ephb6	13848	6	41603590	41619586	0	2	19	20	0	0	9.06E-06	1.47E-05	15	8.5
Trpv6	64177	6	41629690	41637466	0	0	1	4	0	0	1.31E-05	1.47E-05	18	8.5
Llcfc1	76606	6	41682523	41685249	0	0	17	3	2	0	4.77E-06	1.47E-05	9.5	8.5
Olfr459	258569	6	41771982	41772346	0	2	2	0	1	0	1.47E-05	1.47E-05	19	8.5
Kel	23925	6	41686857	41706313	0	0	13	36	0	0	5.23E-06	1.49E-05	11	11
Trpv5	194352	6	41659498	41682568	0	0	9	20	0	0	4.77E-06	1.50E-05	9.5	12
4930546K05Rik	78194	9	42177081	42211004	0	0	9	133	0	0	2.50E-06	2.32E-05	7	13.5
Sc5d	235293	9	42253085	42265825	6	0	2	44	1	0	1.01E-05	2.32E-05	16	13.5
Noct	12457	3	51229706	51229706	0	0	0	1	0	0	3.76E-05	3.76E-05	27.5	15.5
Setd7	73251	3	51526561	51555087	0	0	0	3	0	0	3.76E-05	3.76E-05	27.5	15.5
Mmp23	26561	4	155651217	155654426	0	0	6	6	0	0	0.000124015	0.000295594	41	17
Gm536	224098	16	31615796	31638276	0	0	9	161	0	0	0.000116145	0.000330341	39	19
Rnf168	70238	16	32281055	32300341	2	0	0	23	0	0	0.000122908	0.000330341	40	19
Ubxn7	224111	16	32336588	32391532	8	0	0	25	0	0	8.54E-05	0.000330341	36	19
Vmn2r100	627537	17	19502741	19533682	2	1	4	67	4	0	0.000143652	0.000353606	46	21.5
Vmn2r110	224582	17	20568367	20598413	8	1	21	106	4	0	0.000138834	0.000353606	45	21.5
Vmn2r109	627814	17	20540072	20566223	1	0	5	29	4	0	0.000198066	0.000374941	56	23
Vmn1r232	171227	17	20913551	20915198	0	0	2	0	2	0	0.000353606	0.000379242	111	24
Vmn2r99	665376	17	19360211	19400653	11	3	8	101	6	0	7.54E-05	0.00039317	33	25
Fpr-rs3	14290	17	20623938	20626513	0	0	5	0	1	0	0.000198066	0.000393331	56	26
Gnb1	14688	4	155489447	155557572	1	0	38	105	0	0	0.000132763	0.000394298	44	29
Nadk	192185	4	155560461	155590451	5	0	7	14	1	0	0.000215997	0.000394298	61.5	29
Slc35e2	320541	4	155599586	155622681	4	5	25	35	0	0	0.0001889	0.000394298	53	29
Gm16023	100502734	4	155610933	155626739	0	0	8	26	0	0	0.000215997	0.000394298	61.5	29
Cdk11b	12537	4	155624596	155649870	1	2	45	147	4	0	6.61E-05	0.000394298	31	29
Vmn1r230	171231	17	20845796	20845796	0	0	1	0	0	0	0.000412725	0.000412725	123	32
Vmn2r101	627576	17	19575865	19612285	0	0	7	43	9	0	0.00024878	0.000430014	71	33
Fpr3	14294	17	17968675	17971431	0	0	7	0	3	0	0.000353606	0.000444388	111	34
Vmn1r234	171232	17	21227216	21229221	0	0	3	0	1	0	0.000353606	0.000477189	111	35
Tmed5	73130	5	108107544	108132860	36	0	1	63	1	0	0.00022341	0.000484896	65	39
Ccdc18	73254	5	108130936	108229816	0	0	5	39	0	0	0.000126883	0.000484896	42	39
Pigg	433931	5	108310747	108347377	0	1	15	41	2	0	0.000268919	0.000484896	77	39
Mfsd7a	243197	5	108441106	108451037	22	2	12	44	4	0	3.16E-05	0.000484896	25	39
Gak	231580	5	108569908	108631736	13	0	104	458	11	0	3.99E-05	0.000484896	29	39
Tmem175	72392	5	108627808	108648762	32	4	31	82	3	0	5.05E-05	0.000484896	30	39
Slc26a1	231583	5	108669987	108677304	4	1	8	4	1	0	0.000261495	0.000484896	73	39
Mtf2	17765	5	108063867	108108213	5	0	46	156	2	0	0.000245081	0.000488568	69	45
Pde6b	18587	5	108387200	108431724	4	0	19	412	8	0	1.09E-05	0.000488568	17	45
Pcgf3	69587	5	108461216	108506109	20	2	22	151	2	0	1.76E-05	0.000488568	20	45
Dgkq	110524	5	108646852	108671556	30	1	97	184	9	2	7.76E-05	0.000488568	34	45
Idua	15932	5	108658385	108684543	9	3	26	130	2	0	8.27E-06	0.000488568	14	45
Dr1	13486	5	108270060	108279094	1	0	3	13	0	0	0.000246913	0.000516646	70	48
Vmn1r226	171225	17	20685573	20686509	0	0	2	0	0	0	0.000437044	0.000517387	125	49
Atp5k	11958	5	108433379	108436444	0	0	22	12	0	0	3.05E-05	0.000518328	23	50
Vmn1r229	171224	17	20810089	20814449	0	0	6	0	0	0	0.000274167	0.000569157	81.5	51
Fbxo45	268882	16	32230757	32235994	6	0	0	1	0	0	0.000147517	0.000657736	47	52.5
Tm4sf19	277203	16	32401293	32401293	0	0	0	1	0	0	0.000657736	0.000657736	142	52.5
Scarf2	224024	16	17805005	17805005	0	0	1	1	0	0	0.0007037	0.0007037	145	54
Zfp758	224598	17	22360368	22376857	3	1	5	28	0	0	0.000294859	0.000707658	86	55
Ube2l3	22195	16	17203053	17203053	0	0	1	0	0	0	0.000859684	0.000859684	148	56
Gm35496	102639102	15	19183473	19202696	0	0	13	175	0	0	0.000565971	0.001102537	139	57
Ripk4	72388	16	97760716	97760716	0	0	0	1	0	0	0.001356891	0.001356891	161	58
Olfr1511	258268	14	52390232	52392733	0	0	16	0	4	0	0.001230695	0.001799748	159	59.5
Olfr1510	258423	14	52411233	52412537	0	0	4	0	0	0	0.00178765	0.001799748	179	59.5
Hnrnpc	15381	14	52073778	52105293	2	2	14	87	0	0	9.19E-05	0.001812156	37	61
Grik2	14806	10	49250617	49632581	0	0	0	6	0	0	0.000157091	0.001842877	48	62
Leo1	235497	9	75446872	75446872	0	0	0	1	0	0	0.001864503	0.001864503	188	63
Atad5	237877	11	80090780	80104714	0	0	0	2	0	0	2.96E-05	0.002005444	22	64
4930413E15Rik	74627	5	118950796	118960942	0	0	4	21	0	0	0.001421032	0.0021526	162	65
Mettl17	52535	14	51883521	51891829	5	1	16	19	7	0	0.001645857	0.002288932	172	66
Slc39a2	214922	14	51891077	51895928	3	2	11	1	2	0	0.001804765	0.00243354	186	67
Laptm4a	17775	12	8935325	8935325	0	0	0	1	0	0	0.002841978	0.002841978	218	68
Tnk2	51789	16	32653390	32682685	2	1	42	46	2	1	0.001582432	0.002890058	169	70
Tnk2os	675921	16	32667272	32669077	0	0	2	1	0	0	0.002540191	0.002890058	205	70
Mir1947	100316698	16	33103370	33105436	0	0	5	0	0	0	0.001427095	0.002890058	163.5	70
Smbd1	381043	16	32804856	32812315	1	0	5	10	3	0	0.001896274	0.002928788	190	72
Dach1	13134	14	97787396	98171406	15	2	12	3480	5	0	0.00030932	0.003123794	91	73
Mettl25	216292	10	105770857	105836803	0	0	0	7	0	0	0.003282519	0.003682381	228	74
Gm15663	327812	10	105572032	105581948	0	0	11	63	0	0	0.003344764	0.003722007	229	75
Abhd4	105501	14	54268020	54268020	1	0	0	1	0	0	0.003799906	0.003799906	241.5	76
Mir6411	102465222	10	104285431	104287256	0	0	12	0	0	0	0.002045343	0.00383495	193	77
Pakap	677884	4	57756341	57756341	0	0	0	1	0	0	0.003846802	0.003846802	244	78
Tpk1	29807	6	43345992	43604971	1	0	0	412	0	0	0.001904514	0.003853817	191	79
Olfr446	258292	6	42926850	42926850	0	0	1	0	0	0	0.003864036	0.003864036	246	80
Fpr-rs4	14291	17	18019915	18022309	0	0	6	0	2	0	0.000353606	0.00389312	111	81
Slc6a15	103098	10	103366255	103419354	12	0	8	319	3	0	0.001889569	0.003939978	189	82.5
Tmtc2	278279	10	105188227	105576445	9	2	66	4296	13	0	3.73E-05	0.003939978	26	82.5
Adap2	216991	11	80165514	80175370	0	0	0	5	0	0	0.002622856	0.003981268	212	86
Rnf135	71956	11	80185654	80185654	0	0	0	1	0	0	0.003981268	0.003981268	250	86
Psmd11	69077	11	80426820	80472780	1	0	6	35	0	0	0.002218138	0.003981268	197	86
Myo1d	338367	11	80486157	80728640	0	0	0	57	0	0	0.002382404	0.003981268	203	86
C030013C21Rik	77417	11	80508252	80511009	0	0	11	3	0	0	0.002817451	0.003981268	216	86
Rab36	76877	10	75035542	75048282	0	0	2	1	0	0	0.003989373	0.003989373	253	92
Bcr	110279	10	75061742	75184550	1	1	28	442	9	0	0.000442279	0.003989373	127	92
Specc1l	74392	10	75214447	75303689	0	0	2	14	0	0	0.003081927	0.003989373	224	92
Adora2a	11540	10	75315331	75331678	0	1	2	6	0	0	0.002818085	0.003989373	217	92
Gucd1	68778	10	75360031	75509309	18	0	0	170	0	0	0.001656558	0.003989373	173.5	92
Upb1	103149	10	75403664	75441568	5	1	37	122	3	0	0.001656558	0.003989373	173.5	92
Snrpd3	67332	10	75521868	75521868	0	0	0	1	0	0	0.003989373	0.003989373	253	92
Rhbdl3	246104	11	80299347	80355520	2	0	8	84	0	0	0.001733297	0.004017367	178	96
Arhgef5	54324	6	43264206	43277335	0	0	1	1	0	0	0.003853817	0.004037225	245	97
Rhot1	59040	11	80212493	80267791	1	0	18	91	0	0	0.001982083	0.004043019	192	98
5730455P16Rik	70591	11	80361152	80379869	6	1	15	20	1	0	0.002244747	0.004053467	198	99.5
Zfp207	22680	11	80381384	80404833	4	0	8	21	0	0	0.003702621	0.004053467	239	99.5
Olfr444	258650	6	42953760	42955661	0	0	2	0	1	0	0.004202246	0.004220634	257	101
Cdk5r1	12569	11	80475047	80479461	1	0	3	0	0	0	0.003981268	0.004325664	250	102
Lrch3	70144	16	32912624	33014968	5	0	29	223	5	0	0.00125532	0.004340262	160	103
Gm19782	100503580	15	70010642	70073886	0	0	1	129	0	0	0.001592904	0.004534105	170	104
Nms	433292	1	38937924	38950062	3	0	4	49	1	0	0.003132017	0.005080541	225	105
Rassf9	237504	10	102519628	102542819	0	0	0	4	0	0	0.004920721	0.005314331	273	106
Sned1	208777	1	93234966	93286657	0	0	3	2	0	0	0.00328222	0.005580421	227	107
Mrpl52	68836	14	54425160	54428312	0	1	5	3	1	0	0.004305983	0.006022143	262	108
Nts	67405	10	102481996	102486335	1	0	0	2	0	0	0.005602373	0.006244121	286	110
Alx1	216285	10	102999043	103031809	4	1	6	32	0	0	0.004489481	0.006244121	264	110
Lrriq1	74978	10	103046072	103236919	0	0	13	660	4	0	0.002062166	0.006244121	194	110
Rnase9	328401	14	51038550	51041346	2	0	0	3	0	0	0.006091183	0.006288867	294	112
Suz12	52615	11	79994066	79999410	0	0	1	2	0	0	0.003817507	0.006378652	243	113
Zc3hav1	78781	6	38322262	38339158	0	0	0	3	0	0	0.001133335	0.006489057	155	114
Klrg2	74253	6	38628621	38628621	0	0	0	1	0	0	0.006588354	0.006588354	303	115
Dad1	13135	14	54242622	54252091	1	0	0	3	0	0	0.002114263	0.007019171	195	116
Mgat4c	67569	10	101679519	102385392	0	2	5	2939	0	0	0.002767919	0.007402827	214	117
Trim24	21848	6	37869513	37960724	0	0	2	13	1	0	0.005135413	0.007441636	275	119.5
Svopl	320590	6	37984200	38048978	3	1	28	220	2	0	0.005206746	0.007441636	276.5	119.5
Atp6v0a4	140494	6	38048856	38126276	4	1	22	292	7	0	0.00351908	0.007441636	236	119.5
D630045J12Rik	330286	6	38123457	38249669	10	1	45	539	19	0	0.003052284	0.007441636	222	119.5
Olfr731	258360	14	50238435	50240146	0	0	4	0	1	0	0.005721671	0.007462494	287	122
Olfr727	258316	14	50125072	50127286	0	1	2	0	3	0	0.00748921	0.007550807	326	123.5
Olfr730	258486	14	50183715	50189896	7	2	5	0	1	0	0.007294233	0.007550807	320	123.5
Ubn2	320538	6	38461151	38517189	0	0	5	8	0	0	0.007314611	0.007711591	323	129
Fmc1	66117	6	38531811	38531811	0	0	1	0	0	0	0.007711591	0.007711591	331	129
Luc7l2	192196	6	38550210	38606465	0	2	6	15	0	0	0.006227873	0.007711591	296	129
Clec2l	665180	6	38661152	38661152	0	0	1	0	0	0	0.007711591	0.007711591	331	129
Tbxas1	21391	6	38898335	39083202	5	1	14	567	3	0	0.003964278	0.007711591	248	129
1700025N23Rik	69986	6	39064967	39069599	0	0	26	8	0	1	0.007075039	0.007711591	316	129
Parp12	243771	6	39086993	39119250	2	0	4	35	1	0	0.004261308	0.007711591	260	129
4930599N23Rik	75379	6	39117301	39147847	0	0	2	36	0	0	0.005206746	0.007711591	276.5	129
Kdm7a	338523	6	39138966	39208655	2	0	18	107	0	0	0.002316336	0.007711591	202	129
Phkg2	68961	7	127579085	127579085	0	0	1	1	0	0	0.007742653	0.007742653	341	135
Orai3	269999	7	127769901	127769901	0	1	1	0	0	0	0.007742653	0.007742653	341	135
Hsd3b7	101502	7	127799295	127800196	0	0	2	1	0	0	0.007742653	0.007742653	341	135
Olfr729	258275	14	50149220	50150679	0	0	7	0	0	0	0.006690632	0.007752883	306	137
Acot11	329910	4	106758840	106758862	0	0	0	3	0	0	0.00669056	0.007966153	305	138
Olfr726	258313	14	50083777	50086441	0	0	4	0	2	0	0.006302515	0.007981524	298	139
Ttc26	264134	6	38386390	38415690	0	0	0	4	0	0	0.007734573	0.008123918	335	140
Olfr1508	57270	14	52459271	52469428	17	0	5	8	3	0	0.001053606	0.008312981	152	141
Hipk2	15258	6	38704716	38854827	0	0	0	11	0	0	0.007711591	0.008428338	331	142
Fbxl19	233902	7	127744684	127767512	0	1	1	2	1	0	0.007742653	0.009013814	341	143
Haus4	219072	14	54542609	54555559	0	1	4	5	1	0	0.003799906	0.009648662	241.5	144.5
Cebpe	110794	14	54710537	54713049	1	0	1	6	2	0	0.009158869	0.009648662	373	144.5
Psmb5	19173	14	54615135	54619317	0	0	1	3	0	0	0.009486687	0.009862348	380	146
4931414P19Rik	74359	14	54584518	54605766	1	1	2	45	1	0	0.002586726	0.00990991	207	147
Ajuba	16475	14	54568209	54578206	1	0	6	11	1	0	0.006532214	0.009923077	301	151
Psmb11	73902	14	54624399	54629240	9	0	2	0	1	0	0.00762961	0.009923077	327	151
Cdh24	239096	14	54631417	54643165	2	0	9	13	1	0	0.008500348	0.009923077	358	151
Acin1	56215	14	54642568	54688567	3	0	24	72	6	0	0.004625865	0.009923077	266	151
Mir6948	102466771	14	54643165	54643623	0	0	2	0	0	0	0.009923077	0.009923077	383.5	151
4930579G18Rik	75913	14	54649883	54651678	0	0	5	7	0	0	0.007355448	0.009923077	324	151
Gm29776	101056084	14	54693583	54700279	0	0	2	1	0	0	0.009923077	0.009923077	383.5	151
Omg	18377	11	79504351	79504351	0	0	1	0	0	0	0.010137126	0.010137126	391	155
AU040972	104522	11	79482700	79485609	0	0	4	4	0	0	0.007889293	0.010139477	349	156
Rsph14	71236	10	74963455	75019746	0	0	0	12	0	0	0.003989373	0.010557867	253	157.5
Gnaz	14687	10	74966595	75003237	0	0	1	9	0	0	0.004223081	0.010557867	259	157.5
Nf1	18015	11	79338380	79578704	3	0	23	703	6	0	0.003074525	0.010922545	223	159
Tas2r118	387347	6	23970141	23971702	0	0	9	0	0	0	0.008537845	0.011194464	360	160.5
Iqub	214704	6	24445221	24512850	5	0	0	28	0	0	0.007717544	0.011194464	333	160.5
Zfp169	67911	13	48502761	48502761	0	0	0	1	0	0	0.011262686	0.011262686	421	162
Slc13a1	55961	6	24088760	24169166	1	0	6	262	2	0	0.005808879	0.011347219	289	163
Tomm22	223696	15	79672640	79672673	2	0	0	0	0	0	0.00840739	0.011420092	356	164
Sval1	71578	6	41950402	41950402	0	0	1	0	0	0	0.011535048	0.011535048	429.5	167
Tas2r144	387515	6	42214007	42216268	0	0	2	0	1	0	0.011535048	0.011535048	429.5	167
2010310C07Rik	72131	6	42370772	42377868	0	0	2	2	0	0	0.011535048	0.011535048	429.5	167
Olfr453	258016	6	42743833	42743833	0	0	1	0	0	0	0.011535048	0.011535048	429.5	167
Olfr38	258988	6	42762128	42762827	0	0	1	0	3	0	0.011535048	0.011535048	429.5	167
Gm20765	637578	10	104141009	104196078	0	0	13	0	1	0	0.002745269	0.011689634	213	170
Olfr452	258207	6	42788225	42790725	0	0	14	0	5	0	0.011535048	0.011690444	429.5	171
Fmo3	14262	1	162955787	162985362	0	0	1	13	0	0	0.0099379	0.011827334	385	173
Mroh9	78258	1	163024428	163087551	1	3	28	297	3	0	0.002315218	0.011827334	201	173
Prrx1	18933	1	163245640	163315710	2	2	8	54	0	0	0.008604881	0.011827334	361	173
Mmp14	17387	14	54431925	54445258	12	1	5	28	7	0	0.00348531	0.012288402	235	175
Golm1	105348	13	59636338	59641512	2	0	0	4	0	0	0.011851868	0.012299356	441	176
1700123O20Rik	58248	14	54688567	54688567	0	0	0	1	0	0	0.012346218	0.012346218	449	177
Fam131b	76156	6	42316682	42325588	2	0	2	5	1	0	0.010811103	0.012408992	410.5	178
Gstk1	76263	6	42243970	42250383	1	0	4	21	0	0	0.011274357	0.012577232	423	179.5
Olfr450	258437	6	42815626	42817940	0	0	10	0	1	0	0.011535048	0.012577232	429.5	179.5
Prss36	77613	7	127940066	127947542	0	0	1	2	0	0	0.007742653	0.012840015	341	181
Naa35	78689	13	59588057	59619985	0	0	1	5	0	0	0.008057742	0.013416304	351.5	182
Epha1	13835	6	42361223	42370772	0	0	0	3	0	0	0.011535048	0.013580294	429.5	183
Hyal5	74468	6	24859260	24873719	0	0	0	4	0	0	0.010325958	0.01376368	398	184
Poldip2	67811	11	78516069	78521470	1	0	3	5	2	0	0.013818934	0.013818934	476.5	185.5
Nlk	18099	11	78568002	78698083	4	0	6	200	0	0	0.005845291	0.013818934	290	185.5
Sarm1	237868	11	78483567	78498281	0	0	6	10	2	0	0.010137126	0.01382077	391	187.5
Tmem97	69071	11	78541992	78552641	1	0	3	6	0	0	0.010137126	0.01382077	391	187.5
Ift20	55978	11	78534690	78539383	0	2	3	4	0	0	0.010137126	0.013822606	391	189
Asb15	78910	6	24529848	24567625	0	0	1	4	0	0	0.011194464	0.014085193	419	190
Zyx	22793	6	42348847	42356940	0	0	2	4	0	0	0.011387599	0.014097741	424	191
Sebox	18292	11	78504682	78505023	2	0	0	0	0	0	0.013497118	0.01416864	469	192
Tnfaip1	21927	11	78523693	78538272	1	0	2	7	0	0	0.010137126	0.01429473	391	193
Ccdc6	76551	10	70096674	70193182	1	0	1	41	0	0	0.011699419	0.014306735	439	196
Slc16a9	66859	10	70243632	70284709	5	0	18	130	6	0	0.004846701	0.014306735	270	196
Fam13c	71721	10	70438571	70553055	0	4	24	606	8	0	0.003352039	0.014306735	230	196
Phyhipl	70911	10	70560001	70657402	0	0	8	250	0	0	0.007648283	0.014306735	328.5	196
D630013N20Rik	319646	10	70571578	70657402	0	1	27	238	0	0	0.007648283	0.014306735	328.5	196
Setd1a	233904	7	127791557	127800196	0	0	0	3	0	0	0.007742653	0.014624676	341	199
Grik5	14809	7	25010145	25044164	3	0	0	106	1	0	0.008754413	0.014680878	367	201
Pou2f2	18987	7	25090565	25181553	1	0	7	87	0	0	0.008165301	0.014680878	354	201
Dedd2	67379	7	25203176	25219219	2	0	0	40	4	0	0.011180168	0.014680878	418	201
Hs3st3a1	15478	11	64433402	64522624	7	6	8	863	1	0	0.006749469	0.014681112	309	203
Spock1	20745	13	57444254	57875302	0	0	0	16	0	0	0.009291372	0.014699223	375	204
Mir7046	102465633	7	24971663	24971663	0	0	1	0	0	0	0.014712954	0.014712954	493	205
Slc46a1	52466	11	78466080	78471124	0	0	0	2	0	0	0.014840161	0.014840161	498.5	206.5
Vtn	22370	11	78498281	78498281	0	0	1	0	0	0	0.014840161	0.014840161	498.5	206.5
Maml3	433586	3	51704397	51927303	0	0	0	16	0	0	0.000559194	0.014851637	138	208
D930028M14Rik	434147	7	25151710	25156018	0	0	8	9	0	0	0.011991146	0.014868176	443	209
Dmrtc2	71241	7	24868688	24877464	1	0	2	0	0	0	0.014712954	0.014941407	493	213.5
Lypd4	232973	7	24868688	24869293	0	0	0	2	0	0	0.014941407	0.014941407	502.5	213.5
Rps19	20085	7	24882519	24889269	3	1	20	9	2	0	0.007886267	0.014941407	348	213.5
Cd79a	12518	7	24895720	24901967	1	0	7	7	1	0	0.014712954	0.014941407	493	213.5
Arhgef1	16801	7	24901967	24926331	1	1	34	47	3	0	0.00918682	0.014941407	374	213.5
Erfl	232974	7	24931458	24945558	0	0	3	26	0	0	0.009059711	0.014941407	371	213.5
Atp1a3	232975	7	24979531	25007722	0	0	3	77	6	0	0.008927364	0.014941407	369	213.5
Mir7047	102465634	7	24987580	24989533	0	0	2	0	0	0	0.014941407	0.014941407	502.5	213.5
Clcn1	12723	6	42285750	42314024	3	0	21	44	6	0	0.010544651	0.015169539	404	218
Gsk3a	606496	7	25230087	25230087	0	0	0	1	0	0	0.015278717	0.015278717	507	219
Tcaf1	77574	6	42673324	42711884	1	5	23	233	4	0	0.008039936	0.015444216	350	220
Tas2r139	353148	6	42139059	42141604	0	0	7	0	3	0	0.011597951	0.015903787	437	221
Sva	20939	6	42036636	42042766	1	0	13	39	12	0	0.010430831	0.015954729	402	224
Tmem139	109218	6	42260025	42264253	2	0	8	4	1	0	0.010811103	0.015954729	410.5	224
Casp2	12366	6	42263512	42281719	4	0	5	2	0	0	0.011535048	0.015954729	429.5	224
Olfr456	259144	6	42487483	42487483	0	0	1	0	0	0	0.015954729	0.015954729	515.5	224
Tcaf3	403088	6	42587712	42597372	0	1	1	2	1	0	0.011535048	0.015954729	429.5	224
Macroh2a3	67552	15	62219463	62219463	0	0	1	0	0	0	0.015969924	0.015969924	517.5	227
Gm5893	545936	7	24834070	24839531	0	0	0	4	0	0	0.009561109	0.016283038	381	228
Gkap1	56278	13	58250740	58250740	0	0	0	1	0	0	0.016340272	0.016340272	523	229
Rabac1	14470	7	24971663	24974648	0	0	8	3	2	1	0.012378302	0.01644206	451	230
Erf	13875	7	25243059	25252075	2	0	1	1	1	0	0.010321251	0.016447396	397	231
Pip	18716	6	41850833	41850842	2	0	0	2	0	0	0.016564848	0.016564848	527	232
Guca1a	14913	17	47394672	47423695	4	4	28	160	4	0	0.003695275	0.016774424	238	233.5
1700001C19Rik	75462	17	47412979	47439269	2	0	15	124	2	0	0.006625469	0.016774424	304	233.5
Mrln	69563	10	70204088	70218687	0	0	2	5	0	0	0.014306735	0.016780131	486	235
Klhl3	100503085	13	58001684	58107590	1	0	0	5	0	0	0.012357542	0.016785248	450	236
Kif27	75050	13	58306470	58357237	0	0	0	3	0	0	0.016777981	0.016792516	532	237
Guca1b	107477	17	47383423	47392826	14	1	6	41	4	0	0.011665291	0.016891365	438	238
Olfr447	258990	6	42909641	42910598	0	0	2	0	0	0	0.004220634	0.016933423	258	239
Ccnq	69109	11	78750723	78753705	1	1	6	0	0	0	0.013818934	0.016974099	476.5	240
Ucma	68527	2	4976275	4977213	0	0	1	1	1	0	0.017115915	0.017115915	534.5	241
Tmem132e	270893	11	82387290	82446092	1	0	2	37	2	0	0.013698171	0.017143023	472	244.5
Gm11426	791422	11	82631447	82633558	0	0	40	1	0	0	0.00970105	0.017143023	382	244.5
Cct6b	12467	11	82722799	82766132	0	2	9	247	3	0	0.00378025	0.017143023	240	244.5
Zfp830	66983	11	82763872	82765775	3	0	5	0	5	0	0.017143023	0.017143023	538	244.5
Lig3	16882	11	82781589	82804107	22	0	35	92	7	1	0.012677436	0.017143023	465	244.5
Rffl	67338	11	82802571	82872785	22	1	37	283	1	0	0.003366318	0.017143023	231	244.5
Mir7048	102466794	7	25217812	25219219	0	0	3	0	0	0	0.015034757	0.017740503	506	248
Mrps10	64657	17	47367033	47378630	5	5	88	89	7	0	0.010394335	0.018163423	400	249
Gm12169	210535	11	46522861	46538154	1	1	9	140	3	0	0.010684234	0.018471536	407	250
Ccl1	20290	11	82176765	82307302	3	0	23	611	6	0	0.010481847	0.018701556	403	251
Fscb	623046	12	64471466	64476557	1	0	5	0	11	0	0.011852949	0.018881848	442	252
Tcaf2	232748	6	42641104	42641112	0	0	0	3	0	0	0.017157227	0.018941066	540	253
Gm11423	100503272	11	82781589	82781663	0	0	2	0	0	0	0.016541428	0.019051335	526	254
Mcm10	70024	2	4997464	5012788	0	1	7	14	0	0	0.017115915	0.020680824	534.5	255
Zfp574	232976	7	25081697	25081697	0	0	0	0	1	0	0.020878429	0.020878429	597	256
Lrrc8c	100604	5	105518524	105612276	8	1	4	339	3	0	0.011585131	0.021217493	436	257
Optn	71648	2	5021447	5064180	0	0	3	57	1	0	0.012600024	0.021295694	461	258
Srgap1	117600	10	121781763	122029038	9	0	2	59	2	0	0.011841522	0.021871509	440	259
Sall2	50524	14	52312310	52327328	1	0	0	5	0	0	0.000903228	0.022275374	149	260
Dpagt1	13478	9	44327544	44327544	0	0	1	1	0	0	0.022298315	0.022298315	617	261
Smim26	228715	2	144592364	144595265	1	0	9	6	0	0	0.01432511	0.022426628	488	262
Efcab1	66793	16	14931958	14931958	0	0	0	1	0	0	0.022691038	0.022691038	627	263
Fam135b	70363	15	71431617	71721274	43	0	7	838	7	0	0.000272669	0.02276714	79	264
Sinhcaf	56306	6	148924332	148924332	0	0	0	1	0	0	0.022931956	0.022931956	632	265
Pdcl3	68833	1	38984870	38997096	2	23	36	35	2	0	0.003257225	0.023118581	226	266
Gm5535	433481	2	144127405	144192859	0	0	1	8	0	0	0.014019502	0.023290552	480	267.5
Dtd1	66044	2	144597951	144740069	0	1	35	342	1	0	0.008273513	0.023290552	355	267.5
Med13l	76199	5	118559736	118764808	3	0	5	354	7	0	0.012660134	0.023325392	464	269
Olfr26	18324	9	38854422	38855110	0	0	2	0	1	0	0.023570272	0.023570272	639	270
Macrod2	72899	2	140393501	142392581	23	0	38	11204	5	0	0.004104311	0.023770759	255	271
Dppa1	347708	11	46607797	46631119	13	1	27	254	2	0	0.006191578	0.024227761	295	272
Ctf2	244218	7	127727679	127730195	0	0	0	2	0	0	0.006765127	0.02500386	310	273
Bmerb1	67254	16	14071062	14099319	0	0	0	2	0	0	0.025009582	0.025009582	668	274
Ccdc3	74186	2	5145142	5226174	0	0	0	5	0	0	0.021295694	0.02550558	607	275
Olfr920	258783	9	38750305	38759910	7	13	38	2	2	0	0.015606233	0.0255216	511	276
Slc24a3	94249	2	145169590	145641605	3	0	16	771	5	0	0.005472527	0.025610473	283	277
2310079G19Rik	69699	16	88629198	88629198	0	0	1	0	0	0	0.025907331	0.025907331	691	278
A430090L17Rik	319803	13	114140076	114140088	0	0	0	2	0	0	0.025932001	0.026039083	692	279
Arl15	218639	13	113957227	114154526	0	0	0	16	0	0	0.018155204	0.026146166	552	282.5
Ndufs4	17993	13	114292404	114379937	1	0	0	21	1	0	0.021201478	0.026146166	606	282.5
4930467J12Rik	74909	13	114593124	114608147	0	0	1	4	0	0	0.026146166	0.026146166	700	282.5
4930544M13Rik	75161	13	114606456	114678406	0	0	1	16	0	0	0.025614181	0.026146166	688	282.5
Mocs2	17434	13	114816971	114816971	0	0	1	0	0	0	0.026146166	0.026146166	700	282.5
Itga2	16398	13	114834264	114933885	1	0	1	20	0	0	0.015895636	0.026146166	514	282.5
Pmis2	74927	7	30670963	30673584	1	0	7	0	0	0	0.025197521	0.026354844	674	286
4921509O07Rik	70917	13	113497680	113498024	0	0	0	2	0	0	0.026132424	0.026373139	696	287
Bach1	12013	16	87703942	87720918	0	0	0	2	0	0	0.026436784	0.026436784	704	288
Map3k7cl	224419	16	87552552	87595287	2	0	1	199	0	0	0.017734826	0.026837931	546	289
Gm32865	102635567	16	87125915	87129459	0	0	7	10	0	0	0.018535163	0.027025736	554	292.5
Ltn1	78913	16	87377232	87433895	2	0	2	235	10	0	0.011267927	0.027025736	422	292.5
Rwdd2b	53858	16	87433895	87440228	1	0	0	20	0	0	0.019576881	0.027025736	566.5	292.5
Usp16	74112	16	87452847	87483201	1	1	11	20	2	0	0.019576881	0.027025736	566.5	292.5
Cct8	12469	16	87484299	87497722	0	0	5	10	0	0	0.025199146	0.027025736	679.5	292.5
B130034C11Rik	414095	16	87494088	87501546	0	0	3	9	0	0	0.025199146	0.027025736	679.5	292.5
Krtap26-1	69533	16	88647986	88649760	0	0	3	0	0	0	0.020180162	0.027982867	580	296
N6amt1	67768	16	87353093	87368382	23	0	5	33	1	0	0.005293177	0.028566027	281	297
Lect2	16841	13	56544986	56548528	0	0	1	1	0	0	0.029110607	0.029110607	752.5	298.5
Tgfbi	21810	13	56628048	56630004	0	0	1	1	1	0	0.029110607	0.029110607	752.5	298.5
Dmrta1	242523	4	89679012	89681407	0	0	1	2	0	0	0.028256308	0.029298988	734	300
Chrm2	243764	6	36485341	36524997	3	0	0	58	6	0	0.02033252	0.029922606	583	301
Gm20609	102637684	10	71311748	71311748	0	0	0	1	0	0	0.030093443	0.030093443	775	302
Ptn	19242	6	36716133	36801838	2	0	0	87	1	0	0.021854235	0.030105981	615	303
Nox3	224480	17	3640768	3697789	0	0	2	21	1	0	0.019745618	0.030215986	571	304
4930470H14Rik	75815	17	4047104	4081671	0	0	0	89	0	0	0.016247383	0.030323754	522	305
Caprin2	232560	6	148852966	148890557	0	0	2	6	1	0	0.02270175	0.030500434	628	307
Amn1	232566	6	149173771	149173771	0	0	1	1	0	0	0.030500434	0.030500434	789	307
Bicd1	12121	6	149413859	149559424	2	0	0	8	1	0	0.025428394	0.030500434	685	307
Kcnmb2	72413	3	31914809	32161239	0	0	0	5	0	0	0.028399696	0.030806017	736	309
Grik1	14805	16	87896011	88291850	7	3	17	1732	2	0	0.017266909	0.031135146	542	310
Chst10	98388	1	38863905	38900136	25	2	15	156	1	0	0.004873806	0.031208907	271.5	311
Cldn20	621628	17	3532682	3532683	0	0	2	0	2	0	0.027673956	0.032044277	723.5	312
Gm41279	105245898	15	26054593	26063989	0	0	7	96	0	0	0.018942987	0.032354985	557	313
Gm3435	100041621	17	15022121	15022121	0	0	0	0	1	0	0.032614039	0.032614039	866.5	314
Igflr1	101883	7	30561377	30567535	8	0	10	11	3	0	0.025197521	0.032848015	674	315.5
Kmt2b	75410	7	30571518	30590677	0	0	30	26	8	1	0.03043487	0.032848015	786	315.5
Isx	71597	8	74871375	74893279	1	3	7	28	0	0	0.033132391	0.033132391	887	317
Cldn8	54420	16	88563974	88564747	0	0	3	0	0	0	0.031135146	0.033149733	824	318
Soat1	20652	1	156424599	156475595	91	1	50	348	7	0	0.016028627	0.03336243	519	319
U2af1l4	233073	7	30561377	30566994	0	0	6	13	0	0	0.025197521	0.03346897	674	320
Dennd5b	320560	6	149053579	149102451	0	0	2	2	0	0	0.029619285	0.034007855	767	321
Tnfsf11	21943	14	78278921	78308739	0	0	1	53	2	0	0.014958845	0.034506112	504	324.5
Akap11	219181	14	78493556	78538654	4	1	8	34	5	0	0.033132391	0.034506112	887	324.5
Dgkh	380921	14	78559785	78733035	26	0	9	392	0	0	0.009434178	0.034506112	378	324.5
Vwa8	219189	14	78847460	79202176	5	1	4	704	3	0	0.014314597	0.034506112	487	324.5
Gm4632	100043765	14	79180515	79200629	0	0	7	5	0	0	0.014507301	0.034506112	490	324.5
Zfp957	105590	14	79213080	79249136	0	2	33	119	2	0	0.033132391	0.034506112	887	324.5
4921525O09Rik	74050	13	52096576	52111403	0	0	1	3	0	0	0.029287834	0.035012749	756	328
Gm12610	102633081	4	89455987	89455987	0	0	0	1	0	0	0.035162841	0.035162841	934	329
Acer2	230379	4	86931215	86931300	0	0	0	2	0	0	0.033444181	0.035247061	900	330
4930548J01Rik	78043	17	4120148	4121996	0	0	1	8	0	0	0.020892246	0.035441531	599	331
Klhl8	246293	5	103862482	103913112	2	0	25	160	3	0	0.027634803	0.035456296	721	332.5
Mir5619	100885831	5	104046155	104048202	0	0	9	0	0	0	0.029565811	0.035456296	763	332.5
Gm15881	100271928	8	58701282	58702766	0	0	7	0	0	0	0.033014315	0.035636887	881	334
Kcnj16	16517	11	110966048	111027279	3	4	53	341	0	0	0.024598321	0.03565909	655	335.5
Kcnj2	16518	11	111064729	111076634	9	0	2	9	0	0	0.029586593	0.03565909	766	335.5
Gpalpp1	67467	14	76089411	76111672	3	0	1	14	2	0	0.026656722	0.035787414	709	337
Nudt9	74167	5	104044320	104065136	1	3	37	46	1	0	0.027634803	0.035865657	721	339
Gbp8	76074	5	105014491	105141302	2	1	38	478	7	0	0.019779013	0.035865657	575	339
Gbp9	236573	5	105077848	105141302	17	2	28	143	10	0	0.019779013	0.035865657	575	339
Eif2ak2	19106	17	78853284	78853284	1	0	0	0	0	0	0.03599453	0.03599453	948.5	341.5
Gm6548	625054	17	78853284	78853284	0	0	1	0	0	0	0.03599453	0.03599453	948.5	341.5
Tfb1m	224481	17	3520212	3559454	0	3	5	80	0	0	0.020738688	0.036414599	590.5	343.5
1700102H20Rik	68230	17	3556136	3559454	0	0	10	2	0	0	0.020738688	0.036414599	590.5	343.5
1700047L14Rik	73295	5	108762414	108768113	0	0	1	1	0	0	0.032244598	0.036431707	857	345
Ccdc177	380768	12	80754648	80754648	1	0	0	0	0	0	0.036551035	0.036551035	968	347.5
Susd6	217684	12	80789018	80879616	2	0	1	20	0	0	0.033608168	0.036551035	907	347.5
Gm20337	100504661	12	80946865	80946865	0	0	1	0	0	0	0.036551035	0.036551035	968	347.5
Slc10a1	20493	12	80954405	80966109	0	0	0	7	0	0	0.036387761	0.036551035	956.5	347.5
Ascc3	77987	10	50601078	50601078	0	0	0	1	0	0	0.036838888	0.036838888	977	350
B3galnt1	26879	3	69575399	69575399	0	0	0	0	1	0	0.037030578	0.037030578	983	351
Sec61a2	57743	2	5872701	5897366	0	1	10	17	1	0	0.029576213	0.037297762	765	354.5
Dhtkd1	209692	2	5897169	5943283	5	1	54	151	6	0	0.020411626	0.037297762	586	354.5
Upf2	326622	2	5950861	6050519	0	0	2	18	0	0	0.030300307	0.037297762	784	354.5
Proser2	227545	2	6098071	6131090	1	0	1	47	9	0	0.019726576	0.037297762	570	354.5
Echdc3	67856	2	6191790	6215002	0	0	7	12	0	0	0.022788933	0.037297762	629.5	354.5
A230108P19Rik	320132	2	6191790	6319515	0	0	1	254	0	0	0.022788933	0.037297762	629.5	354.5
Barhl2	104382	5	106452997	106459151	1	2	3	4	1	0	0.035291249	0.037321145	939	358
Crhr1	12921	11	104133400	104175486	14	0	0	286	2	0	0.012777246	0.037352324	467	359
Crybg1	11630	10	44130339	44130339	0	0	0	1	0	0	0.037428585	0.037428585	992.5	360.5
Atg5	11793	10	44338946	44338946	0	0	0	1	0	0	0.037428585	0.037428585	992.5	360.5
Ppm1l	242083	3	69457094	69548153	0	0	1	6	1	0	0.031921075	0.037462471	849	362
Sppl2c	237958	11	104184372	104191084	6	1	24	16	3	0	0.031103383	0.037506617	823	363
Dspp	666279	5	104168724	104180109	16	1	6	39	46	0	0.020921194	0.037578257	601.5	364
Spp1	20750	5	104433133	104440961	2	1	46	28	11	0	0.024277794	0.037815556	648.5	365
Gm10857	100038358	2	6131090	6132351	0	0	2	0	0	0	0.037297762	0.037819807	987	366
Nufip1	27275	14	76109340	76137300	6	0	1	12	0	0	0.019657627	0.037842324	568	367
2700089I24Rik	72647	19	59500202	59550549	0	0	0	56	0	0	0.026308763	0.038103191	703	368
Nudt5	53893	2	5844610	5870201	2	0	2	5	0	0	0.036588688	0.038113143	971	369
Hsd17b11	114664	5	103993930	104012861	0	0	0	4	1	0	0.03147532	0.038123168	834.5	370
Cdh10	320873	15	18817181	19013791	5	4	80	1938	8	0	0.000359566	0.038535545	120	371
Bicc1	83675	10	70925963	71161399	0	0	39	1341	10	1	0.004695938	0.038822109	267	374
C730027H18Rik	319572	10	71173365	71183965	0	0	22	69	0	0	0.024658345	0.038822109	656	374
1700113B09Rik	78638	10	71179377	71203894	0	0	32	126	0	0	0.006577947	0.038822109	302	374
Tfam	21780	10	71227238	71240223	2	0	4	8	0	0	0.031867202	0.038822109	845	374
Ube2d1	216080	10	71255745	71285740	1	0	5	14	1	0	0.025620325	0.038822109	689	374
Galntl6	270049	8	57774194	58914172	8	8	78	5827	3	1	0.010416972	0.039064815	401	377
Sel1l	20338	12	91807478	91851078	10	1	65	244	5	0	0.029277382	0.039201135	754	378
Sult6b1	73671	17	78906390	78908668	0	0	1	1	0	0	0.038168944	0.039297468	1019	379
Wdr95	381693	5	149569941	149569941	0	0	0	1	0	0	0.039474646	0.039474646	1053	380
Dsg2	13511	18	20587894	20587894	0	0	0	1	0	0	0.039521513	0.039521513	1055	381
Btbd2	208198	10	80649503	80649503	0	0	1	1	0	0	0.039671464	0.039671464	1059	382
Bbox1	170442	2	110263013	110316538	9	1	11	197	0	0	0.022461702	0.039672726	621	383
Mapt	17762	11	104229822	104325943	0	1	17	198	0	0	0.015605549	0.039818999	510	384
Gm31747	102634075	6	73603810	73603810	0	0	0	1	0	0	0.039976393	0.039976393	1067	385
Fibin	67606	2	110364616	110364616	0	0	1	0	0	0	0.040002939	0.040002939	1068	386
Cisd1	52637	10	71335327	71340986	0	0	0	2	0	0	0.024014038	0.040116482	646	387
Kcnmb3	100502876	3	32475050	32475050	0	0	0	1	0	0	0.04045922	0.04045922	1072	388
Sparcl1	13602	5	104079947	104115310	0	1	11	117	4	0	0.025940576	0.040521467	693	389
Efs	13644	14	54920211	54920211	1	0	0	0	1	0	0.040540334	0.040540334	1073	390
Gtf2a1l	71828	17	88667233	88715078	4	0	20	514	7	0	0.027702545	0.040575652	727	391.5
Lhcgr	16867	17	88717152	88793968	117	0	57	1108	11	0	0.024577657	0.040575652	654	391.5
Vmn2r10	22307	5	108990300	109008502	36	1	6	24	13	0	0.018259114	0.040618815	553	393
Rnf212	671564	5	108729476	108776583	1	0	13	47	0	0	0.030307999	0.040654613	785	400
Vmn2r8	627479	5	108792775	108810822	18	0	3	20	3	0	0.012394807	0.040654613	452	400
Vmn2r15	211223	5	109285771	109299608	6	0	3	13	3	0	0.039889645	0.040654613	1064	400
Gm10416	667213	5	109834607	109834607	0	0	1	0	0	0	0.040654613	0.040654613	1077.5	400
Gm15446	100642166	5	109921792	109942936	0	1	20	30	1	0	0.026537273	0.040654613	707	400
Zfp932	69504	5	109994635	110009580	0	2	12	24	2	0	0.032546653	0.040654613	865	400
Zfp605	675812	5	110108959	110128169	0	1	7	29	5	0	0.024918963	0.040654613	663	400
Chfr	231600	5	110134062	110171260	5	1	6	43	2	0	0.032244598	0.040654613	857	400
Gm15787	100504007	5	110156483	110178465	0	0	5	27	0	0	0.031394396	0.040654613	830	400
Golga3	269682	5	110174999	110226009	10	0	4	139	6	0	0.031024466	0.040654613	821	400
Ankle2	71782	5	110229025	110256596	7	0	26	28	1	0	0.029887238	0.040654613	771	400
Pgam5	72542	5	110259901	110271789	2	1	23	30	1	1	0.032244598	0.040654613	857	400
Fbrsl1	381668	5	110362259	110446614	5	1	8	279	2	0	0.02888942	0.040654613	746	400
Kat14	228714	2	144379561	144405652	0	0	0	5	2	0	0.040704432	0.040704432	1080.5	407
Vmn2r14	231591	5	109211907	109226581	12	0	9	33	13	0	0.031394396	0.040930324	830	408
Trpm6	225997	19	18748238	18891991	15	1	17	992	22	0	0.023850003	0.041001629	643	409
Rpl31	114641	1	39366871	39371897	9	0	18	9	0	0	0.029770469	0.041193341	768	410
Vmn2r9	435864	5	108835392	108854531	21	0	16	26	7	0	0.033224553	0.041277518	891	411
Plcxd1	403178	5	110100196	110105346	3	0	1	2	1	0	0.038865121	0.041357771	1035	412.5
Lrcol1	381667	5	110342739	110354100	1	1	5	15	0	0	0.039889645	0.041357771	1064	412.5
Nmd3	97112	3	69741209	69741209	0	0	0	1	0	0	0.041619834	0.041619834	1096	414
Snord17	100313519	2	144267588	144267588	0	0	1	0	0	0	0.041780414	0.041780414	1097.5	415
Adat2	66757	10	13551329	13556015	0	0	1	2	0	0	0.036219958	0.04181128	953	416
Vmn1r228	171226	17	20776725	20779352	0	0	3	0	1	0	0.000252016	0.042083578	72	417
Vmn2r13	231589	5	109153158	109194108	4	1	7	172	11	0	0.020871321	0.04215546	596	418.5
Vmn2r17	384221	5	109418582	109458137	6	1	3	60	2	0	0.024660034	0.04215546	657	418.5
1700016H13Rik	74218	5	103648041	103655598	1	1	1	2	0	0	0.035456296	0.042216374	941	420
Wdr27	71682	17	14818617	14941842	6	0	12	623	7	0	0.026276433	0.042221558	702	421
1700052I22Rik	67340	12	80924630	80924674	0	0	2	0	0	0	0.036387761	0.042322646	956.5	422
Fgfrl1	116701	5	108691455	108704136	0	0	6	10	0	0	0.033403259	0.042483672	898	423
Tmed11	67366	5	108777929	108797268	0	1	4	22	1	0	0.034412765	0.042811884	921	424.5
Vmn2r11	384219	5	109043474	109061266	18	1	12	28	5	0	0.03191401	0.042811884	847.5	424.5
Zmym6	100177	4	127103276	127103276	0	0	1	1	0	0	0.04300074	0.04300074	1124	426
Zfp133-ps	668917	2	144457599	144497850	0	0	2	91	0	0	0.013796727	0.043154538	473.5	427
Slc7a8	50934	14	54722331	54783897	8	1	9	111	2	0	0.005739415	0.043234337	288	428
Trpc7	26946	13	56792210	56818685	0	0	0	4	0	0	0.027865953	0.043527558	731	429
Usp13	72607	3	32883450	32891009	0	0	0	2	0	0	0.043569809	0.043731075	1138	430
Bcl7c	12055	7	127661595	127710888	16	0	3	123	0	0	0.006340571	0.044055661	299	431
Galnt9	231605	5	110542538	110621106	1	0	1	13	0	0	0.031271623	0.044220878	827	433
Ddx51	69663	5	110655220	110659363	1	0	2	2	0	0	0.03279271	0.044220878	873	433
Hscb	100900	5	110829448	110841671	0	0	52	70	1	0	0.035178178	0.044220878	935.5	433
4930550C17Rik	75245	13	56227007	56237074	0	0	0	2	0	0	0.031737723	0.044226164	842	435
Cmtm5	67272	14	54936337	54937371	0	1	2	1	0	0	0.043234337	0.044365531	1128.5	436
Vmn2r16	384220	5	109328633	109370058	9	2	9	67	1	0	0.02646877	0.044566391	706	437
Pvt1	19296	15	62065627	62374170	0	0	5	277	0	0	0.015969924	0.044670592	517.5	438
Gm4285	100043189	14	75844193	75846595	0	0	3	1	0	0	0.037842324	0.044688266	1012	439
Gtpbp6	107999	5	110104070	110109917	0	0	8	2	3	0	0.040654613	0.044845426	1077.5	440
Otor	57329	2	143076680	143081377	3	0	21	11	1	0	0.031875578	0.045096251	846	441
1700006F04Rik	75432	14	119750306	119750306	0	0	0	1	0	0	0.045168557	0.045168557	1171	442
Hnrnph1	59013	11	50377795	50377795	0	1	1	1	0	0	0.045297241	0.045297241	1179.5	443.5
Rufy1	216724	11	50393579	50420115	0	0	1	5	0	0	0.045297241	0.045297241	1179.5	443.5
Vmn2r12	627569	5	109084397	109099438	4	1	4	30	1	0	0.03191401	0.045582463	847.5	445
Wincr1	100040617	4	89059523	89069448	0	0	0	2	0	0	0.046309257	0.046309257	1202.5	446.5
Gm12602	102637941	4	89113487	89113487	0	0	0	1	0	0	0.046309257	0.046309257	1202.5	446.5
Gbp4	17472	5	105116592	105141302	12	3	9	64	8	0	0.019779013	0.046333219	575	448
Tmem259	216157	10	79978734	79984640	0	0	3	0	2	0	0.046535116	0.046535116	1207	449
Crlf2	57914	5	109554972	109560178	0	1	7	5	2	0	0.040618815	0.046555382	1076	450
Rbbp9	26450	2	144546063	144549291	0	0	0	2	0	0	0.044417289	0.046703453	1160	451
Rnf212b	102632837	14	54812142	54851299	0	1	20	4	0	0	0.026789517	0.04707832	711	452
Dzank1	241688	2	144471647	144528133	36	0	2	68	0	0	0.013796727	0.047340366	473.5	453
Slc25a48	328258	13	56457340	56457340	0	0	0	1	0	0	0.04746759	0.04746759	1234	454
Ffar2	233079	7	30818510	30825353	11	2	25	19	2	0	0.033264624	0.047973287	892	459
Mag	17136	7	30899644	30916446	1	0	4	44	7	0	0.03629476	0.047973287	955	459
Hamp	84506	7	30943829	30945934	0	0	7	1	0	0	0.037568042	0.047973287	999.5	459
Usf2	22282	7	30945581	30957800	2	0	1	19	0	0	0.037568042	0.047973287	999.5	459
Lsr	54135	7	30957800	30974237	1	1	4	17	1	0	0.036421117	0.047973287	959.5	459
Fam187b	76415	7	30972842	30989597	2	3	10	35	3	0	0.037568042	0.047973287	999.5	459
Wtip	101543	7	34109670	34134758	3	0	4	16	0	1	0.047973287	0.047973287	1248	459
Uba2	50995	7	34141164	34170498	3	0	18	36	1	0	0.036421117	0.047973287	959.5	459
Pdcd2l	68079	7	34184606	34196200	1	0	5	23	2	0	0.03770843	0.047973287	1004	459
Scgb1b30	100043868	7	34094926	34100725	1	0	6	28	3	0	0.021083254	0.048015189	603	464
Kif16bos	75053	2	142901869	142903355	0	0	9	2	0	1	0.040704432	0.048164992	1080.5	465
Bdnf	12064	2	109672955	109723496	0	2	9	23	1	0	0.037709478	0.048185689	1005	468
Platr8	100038454	2	109903296	109915090	0	0	6	56	0	0	0.031013638	0.048185689	820	468
Lgr4	107515	2	109916082	110013068	1	0	18	145	5	0	0.021147934	0.048185689	604	468
Ccdc34	68201	2	110015972	110170109	2	0	36	129	2	0	0.032920246	0.048185689	879	468
Ccdc34os	75517	2	110031901	110050013	0	0	0	56	0	0	0.037358362	0.048185689	988	468
Scgb1b27	11354	7	34020626	34022699	2	0	4	5	1	0	0.047973287	0.048258255	1248	471
Scgb2b26	110187	7	33945757	33946966	0	0	7	0	0	0	0.037568042	0.048374557	999.5	472
Spidr	224008	16	15920607	16021512	0	0	0	2	0	0	0.021505996	0.048470354	611	473
Slc5a12	241612	2	110601275	110646447	1	0	0	241	5	0	0.024552623	0.048503694	653	474.5
Ano3	228432	2	110656660	110952736	2	1	8	305	2	0	0.027688038	0.048503694	725	474.5
Ep400	75560	5	110664878	110765972	1	0	3	17	1	0	0.03452279	0.04875689	922	476
Pcsk2os1	378776	2	143538177	143549527	0	0	13	17	0	0	0.039028676	0.048823825	1039	477
Kif16b	16558	2	142617495	142903355	17	0	46	2107	25	0	0.012330675	0.048989617	448	483
Snrpb2	20639	2	143061176	143072616	28	7	86	154	5	0	0.020023839	0.048989617	579	483
Pcsk2	18549	2	143547483	143816146	6	0	0	2595	4	1	0.017123372	0.048989617	536	483
Pcsk2os2	378775	2	143749818	143797879	0	0	67	504	0	0	0.021465539	0.048989617	609	483
Bfsp1	12075	2	143826675	143865174	0	0	18	375	9	0	0.02532754	0.048989617	684	483
Dstn	56431	2	143913343	143942879	6	1	17	179	2	0	0.027125955	0.048989617	714	483
Rrbp1	81910	2	143947889	144013037	1	0	85	346	22	0	0.021494023	0.048989617	610	483
Banf2	403171	2	144031127	144073128	0	1	20	409	0	0	0.011162501	0.048989617	417	483
Snx5	69178	2	144257771	144272824	0	0	3	8	0	0	0.041780414	0.048989617	1097.5	483
Mgme1	74528	2	144269657	144280910	5	1	3	5	1	0	0.038520022	0.048989617	1025	483
Ovol2	107586	2	144307050	144332454	0	0	1	33	0	0	0.017928625	0.048989617	550.5	483
Traf4	22032	11	78164110	78166291	0	0	2	1	0	0	0.047884754	0.049017116	1240.5	489
Tpt1	22070	14	75844193	75847100	0	0	3	3	0	0	0.037842324	0.049127857	1012	490.5
Snora31	100303751	14	75846169	75847100	0	0	3	0	0	0	0.037842324	0.049127857	1012	490.5
Hira	15260	16	18849681	18849729	0	0	0	3	0	0	0.035710039	0.04963017	943	492
Mtmr2	77116	9	13805638	13805638	1	0	0	0	0	0	0.050092086	0.050092086	1302	493
Lin7c	22343	2	109889733	109900524	1	0	1	11	0	0	0.035953091	0.050102017	947	494
Scgb2b27	233099	7	34012637	34015680	0	0	3	3	0	0	0.03938115	0.050562682	1050	495
Scgb2b21	626970	7	33518810	33522373	0	0	8	10	0	0	0.0190214	0.050725944	558	496
Dthd1	100322896	5	62809705	62888205	0	4	88	281	15	0	0.032338943	0.051553813	859	497
Lmnb1	16906	18	56706276	56753031	2	0	6	195	2	0	0.036978452	0.05184878	981	498.5
Marchf3	320253	18	56761837	56927083	1	2	26	732	1	0	0.031993877	0.05184878	851	498.5
Slc47a1	67473	11	61345693	61375889	0	0	0	4	0	0	0.031060157	0.051925402	822	500
Aldh7a1	110695	18	56538775	56566804	0	0	2	7	0	0	0.051442795	0.051951408	1326.5	501.5
Phax	56698	18	56561327	56566804	0	0	1	2	0	0	0.051951408	0.051951408	1351	501.5
Foxj3	230700	4	119543580	119628160	1	0	0	5	1	0	0.043594776	0.051966819	1140	503
Rasgef1b	320292	5	99241108	99728212	0	0	0	567	0	0	0.019221768	0.052205909	560.5	504.5
A930011G23Rik	319818	5	99301317	99728212	9	0	0	560	0	0	0.019221768	0.052205909	560.5	504.5
Sdk1	330222	5	141253783	142214361	1	0	1	1807	3	0	0.032718208	0.052553726	869	506
Ppih	66101	4	119300047	119322352	3	4	35	100	7	0	0.034217787	0.052575652	919	507
Scgb2b23-ps	353109	7	33625999	33655136	0	0	17	136	0	0	0.029279063	0.054006824	755	508
Dnaja4	58233	9	54702796	54702796	0	0	0	1	0	0	0.054064398	0.054064398	1391	509
Pus1	56361	5	110776415	110782060	0	0	2	1	0	0	0.043106653	0.05418365	1126	510
Camk1d	227541	2	5295999	5713183	1	0	7	796	0	0	0.010732365	0.05480273	409	511
1700022A22Rik	71120	15	46323527	46373770	0	0	1	60	0	0	0.037727103	0.054834706	1006	512
Gramd3	107022	18	56398891	56502082	0	1	13	345	5	0	0.022585174	0.055139974	624	513
Rnf112	22671	11	61448628	61455727	3	0	2	6	0	0	0.045355683	0.055424641	1183	515.5
Mfap4	76293	11	61483951	61488277	1	0	3	4	0	0	0.048426163	0.055424641	1259.5	515.5
B9d1	27078	11	61503366	61512325	0	1	19	7	1	0	0.048426163	0.055424641	1259.5	515.5
Epn2	13855	11	61517839	61580056	2	1	6	51	0	0	0.037553462	0.055424641	996	515.5
Mapk7	23939	11	61491455	61495708	0	0	7	2	0	0	0.055424641	0.055571091	1426	518
Tex43	67343	18	56587910	56592556	1	0	2	3	1	0	0.051442795	0.055649147	1326.5	519
Crlf3	54394	11	80046682	80065602	1	0	0	3	0	0	0.003981268	0.055695077	250	520
G6pd2	14380	5	61806818	61811017	3	1	8	0	3	0	0.051553813	0.055893384	1329.5	521
Ccdc30	73332	4	119323047	119417187	23	4	35	405	2	0	0.023889208	0.056015822	644	522
C330018D20Rik	77422	18	56956456	56977367	4	0	23	99	0	0	0.030797864	0.056035262	810	523
Homez	239099	14	54858912	54869878	0	1	1	4	0	0	0.043234337	0.056083574	1128.5	524
Ybx1	22608	4	119278271	119296524	1	0	12	29	0	0	0.044604244	0.056310492	1164	525
Lhx5	16873	5	120430485	120430728	0	0	2	0	0	0	0.042015154	0.056433928	1106	526
Pole4	66979	6	82675171	82687149	0	0	0	10	0	0	0.049239359	0.056654129	1276	527
1700074P13Rik	73481	6	40924772	40933658	0	0	0	3	0	0	0.000473889	0.05685301	134	528
Ppcs	106564	4	119419371	119422472	0	0	1	10	0	0	0.048274564	0.056943108	1255	530
Zmynd12	332934	4	119421049	119465856	2	0	6	74	1	0	0.035133461	0.056943108	932	530
Rimkla	194237	4	119465533	119494577	5	0	4	77	2	0	0.026657598	0.056943108	710	530
Plg	18815	17	12376688	12417424	0	0	20	203	9	0	0.033679485	0.057550284	910	532
Vcpkmt	207965	12	69583058	69583579	0	4	5	0	0	0	0.051674415	0.057984094	1336.5	533
Nob1	67619	8	107419076	107419076	0	0	1	1	0	0	0.058131975	0.058131975	1484	534
Agtpbp1	67269	13	59450796	59579834	0	1	1	18	0	0	0.008057742	0.058567048	351.5	535
1700054A03Rik	78457	19	53032642	53074722	0	0	2	10	0	0	0.037734218	0.058944227	1007	536
Olfr390	258344	11	73786461	73786461	0	0	1	0	0	0	0.059157958	0.059157958	1502	537
Mpped1	223726	15	83838786	83838786	0	0	0	1	0	0	0.059381723	0.059381723	1506	538
Kif21a	16564	15	90935294	91051902	0	0	42	484	10	0	0.030293509	0.059507391	782	539.5
Abcd2	26874	15	91151463	91193007	0	0	1	46	4	0	0.047540501	0.059507391	1235	539.5
Sox6	20679	7	115471140	116037854	7	0	10	282	0	0	0.022368094	0.059704356	618	541
Oas1g	23960	5	120877138	120886723	0	0	1	3	0	0	0.049176359	0.060116979	1274	542.5
Oas1d	100535	5	120914238	120914238	0	0	1	0	0	0	0.060116979	0.060116979	1524.5	542.5
Heatr5b	320473	17	78763775	78829762	0	0	0	8	1	0	0.029489527	0.060192158	760	544
Gm14092	627302	2	145552522	145556912	0	0	2	4	0	0	0.057977932	0.060339665	1481	545
Agpat4	68262	17	12116845	12219248	6	2	79	693	3	0	0.035182104	0.060359456	937	546
4732491K20Rik	224523	17	12317487	12324191	0	0	14	24	0	0	0.040051089	0.060789743	1069	547
Supt6	20926	11	78209225	78244307	0	0	1	12	0	0	0.050893865	0.060929926	1316	549
Sdf2	20316	11	78244307	78254967	0	0	3	2	1	0	0.060929926	0.060929926	1544	549
Aldoc	11676	11	78321460	78322256	0	0	5	0	0	0	0.059488016	0.060929926	1509	549
Rgl1	19731	1	152516859	152768149	26	1	31	1826	8	0	0.036534052	0.060980662	964.5	553
Smg7	226517	1	152837203	152903845	5	0	24	214	6	0	0.049441013	0.060980662	1283	553
Nmnat2	226518	1	152953197	153119081	17	0	66	1539	5	0	0.039695408	0.060980662	1060	553
Lamc2	16782	1	153123020	153188444	15	1	72	685	21	0	0.031217816	0.060980662	825	553
Lamc1	226519	1	153219202	153245526	18	0	47	228	20	0	0.045467428	0.060980662	1186	553
Mrpl18	67681	17	12911817	12916736	0	1	3	5	0	0	0.045205277	0.061128341	1172	556
Arpc5	67771	1	152765222	152775476	7	0	18	50	2	0	0.049441013	0.061138772	1283	557
Csnk1e	27373	15	79423872	79423872	1	0	0	1	0	0	0.061224359	0.061224359	1555	558
Evi2b	216984	11	79515098	79525462	3	1	6	8	0	0	0.010084836	0.061294545	386.5	559
Tpx2	72119	2	152855319	152855319	0	0	0	1	0	0	0.061367311	0.061367311	1560	560
Kbtbd7	211255	14	79424689	79429381	2	0	2	0	0	0	0.044332873	0.061581695	1156	561
Snord4a	100216539	11	78182115	78183314	0	0	2	0	0	0	0.060929926	0.061627657	1544	562.5
Snord42a	100529076	11	78182115	78183314	0	0	2	0	0	0	0.060929926	0.061627657	1544	562.5
Dcstamp	75766	15	39744249	39760670	4	0	6	33	4	0	0.050975947	0.061649595	1319	564.5
Lrp12	239393	15	39870977	39930919	2	0	0	6	0	0	0.061649595	0.061649595	1565	564.5
Apobec4	71281	1	152748609	152757194	0	1	17	65	8	0	0.036534052	0.06169096	964.5	566
Epdr1	105298	13	19591747	19621356	25	1	8	348	2	0	0.047104092	0.061912731	1226	568
Sfrp4	20379	13	19621109	19632652	6	4	27	60	2	0	0.038406113	0.061912731	1023	568
Nme8	73412	13	19645383	19699403	1	0	1	7	0	0	0.059277868	0.061912731	1503	568
Ankrd1	107765	19	36112078	36121800	4	2	22	76	3	2	0.043132011	0.061963881	1127	570
Map3k4	26407	17	12227680	12320633	3	6	68	599	11	0	0.035925985	0.062311765	946	571
Fam222b	216971	11	78092810	78154981	0	0	3	46	1	0	0.049223517	0.062325388	1275	580.5
Nek8	140859	11	78166291	78177484	1	1	5	4	1	0	0.047884754	0.062325388	1240.5	580.5
Rpl23a	268449	11	78182115	78185512	0	0	8	2	0	0	0.060929926	0.062325388	1544	580.5
Snord42b	100529077	11	78183314	78184786	0	0	4	0	0	0	0.060929926	0.062325388	1544	580.5
Rab34	19376	11	78186993	78191974	1	0	7	1	1	0	0.060338838	0.062325388	1531	580.5
Proca1	216974	11	78191534	78195317	0	2	9	4	0	0	0.04955865	0.062325388	1285	580.5
2610507B11Rik	72503	11	78267852	78289513	1	0	15	40	4	0	0.058449806	0.062325388	1493	580.5
Rskr	216976	11	78289240	78295043	1	0	8	5	1	0	0.050893865	0.062325388	1316	580.5
Spag5	54141	11	78299929	78322256	1	2	22	28	5	1	0.049728653	0.062325388	1291	580.5
Pigs	276846	11	78328490	78342781	7	0	1	40	6	0	0.044099505	0.062325388	1147	580.5
Unc119	22248	11	78341497	78348522	0	0	23	12	3	0	0.044099505	0.062325388	1147	580.5
Foxn1	15218	11	78359196	78387186	0	0	1	93	0	1	0.044099505	0.062325388	1147	580.5
Slc13a2os	790911	11	78394237	78402276	0	0	2	4	0	0	0.054767811	0.062325388	1409	580.5
Slc13a2	20500	11	78398945	78423090	0	0	1	63	1	0	0.048798049	0.062325388	1268	580.5
Ksr1	16706	11	79013672	79147870	30	1	21	255	2	0	0.042354334	0.062325388	1114	580.5
Gm11201	790910	11	79022645	79030849	0	0	4	27	0	0	0.050893865	0.062325388	1316	580.5
Wsb1	78889	11	79239398	79256579	8	0	15	23	1	0	0.054949562	0.062325388	1414.5	580.5
Rab11fip4os1	790912	11	79610052	79621847	0	0	0	75	0	0	0.010137126	0.062325388	391	580.5
Tlcd1	68385	11	78174965	78180670	1	4	6	1	0	0	0.059510345	0.062571219	1511.5	590.5
Mir7653	102465761	11	78177062	78178858	0	0	4	0	0	0	0.059510345	0.062571219	1511.5	590.5
Isl1	16392	13	116300890	116308071	0	0	2	4	0	0	0.061026173	0.062657718	1551.5	592
Htr7	15566	19	35958829	36059233	8	0	10	986	2	0	0.009334095	0.062835717	377	593
Mcfd2	193813	17	87254533	87267790	19	5	25	118	5	0	0.000607969	0.062850157	141	594.5
Ttc7	225049	17	87281031	87376232	1	0	43	126	1	0	0.000918835	0.062850157	150	594.5
Sds	231691	5	120479608	120479608	0	0	1	1	0	0	0.062977788	0.062977788	1588.5	596
Colgalt2	269132	1	152397852	152510557	7	4	16	1229	8	0	0.038850075	0.063094107	1033	597
Gm5916	546123	9	36119981	36130489	1	0	6	12	3	0	0.021624581	0.06366072	612	598
A830052D11Rik	402767	18	32360624	32379763	0	0	10	71	0	0	0.0462603	0.063990359	1198.5	601
Gm35060	102638514	18	32458134	32474570	2	0	10	35	2	0	0.039137102	0.063990359	1043	601
Gypc	71683	18	32528540	32561359	6	2	8	75	0	0	0.0445426	0.063990359	1163	601
Tslp	53603	18	32813416	32819774	2	0	15	10	2	0	0.030049428	0.063990359	774	601
Wdr36	225348	18	32835331	32866095	1	0	7	37	3	0	0.055139546	0.063990359	1419	601
Rpp30	54364	19	36081750	36104769	5	0	38	257	3	0	0.04133727	0.064059806	1091	604
Slx4	52864	16	3980684	4002975	11	1	31	47	11	0	0.028675087	0.06419411	742	606.5
Dnase1	13419	16	4037251	4039624	1	1	4	5	1	0	0.063668853	0.06419411	1603.5	606.5
Trap1	68015	16	4041070	4071873	0	0	1	17	0	0	0.063668853	0.06419411	1603.5	606.5
Crebbp	12914	16	4092493	4197374	0	0	1	28	1	0	0.014264993	0.06419411	485	606.5
Hapln1	12950	13	89585854	89608065	0	0	0	13	1	0	0.057281789	0.064235452	1464	609
Ncf2	17970	1	152798199	152836990	6	8	105	425	9	0	0.005254195	0.064499713	279	610
Dpys	64705	15	39768625	39859468	7	3	43	424	5	1	0.033442265	0.06458266	899	611.5
Gm16291	100503072	15	39797130	39810006	0	0	1	122	0	0	0.049079043	0.06458266	1272	611.5
Efcab6	77627	15	83897474	83983741	0	0	1	4	0	0	0.038129359	0.064754505	1018	613
C430042M11Rik	320021	17	83852990	83856186	0	0	15	35	0	0	0.050608808	0.065656902	1310	614
BC030500	234290	8	58910229	58914172	7	0	7	3	0	0	0.062471308	0.066025325	1582	615
Rgcc	66214	14	79289018	79303487	1	1	24	85	2	0	0.044332873	0.066184817	1156	617.5
Naa16	66897	14	79325454	79392445	30	1	17	86	0	0	0.044332873	0.066184817	1156	617.5
Mtrf1	211253	14	79395936	79422645	0	14	53	120	7	0	0.03135253	0.066184817	828	617.5
Wbp4	22380	14	79460254	79483482	7	6	30	77	2	0	0.030295501	0.066184817	783	617.5
Gm19935	100503868	8	90816240	90819371	5	4	24	2	1	0	0.048375946	0.066285943	1257	620
Btc	12223	5	91362008	91362008	0	0	0	1	0	0	0.066431412	0.066431412	1657	621
Cited4	56222	4	120665427	120667805	1	0	5	0	0	0	0.055117099	0.06672029	1418	622
Gramd4	223752	15	86112210	86112210	0	0	0	1	0	0	0.067159122	0.067159122	1672	623
Gm33251	102636079	15	40043248	40127300	0	0	23	290	0	0	0.023343973	0.067600887	637	624
Stx6	58244	1	155181066	155192944	0	0	0	7	0	0	0.030877916	0.068065535	815	627.5
Abl2	11352	1	156557037	156649154	53	1	23	369	13	0	0.035059644	0.068065535	931	627.5
Tor3a	30935	1	156653643	156676277	17	2	59	194	4	0	0.020849238	0.068065535	595	627.5
Fam20b	215015	1	156678609	156719583	51	0	55	284	3	0	0.024948744	0.068065535	666	627.5
Ralgps2	78255	1	156804281	156938864	49	0	35	1014	6	0	0.03315071	0.068065535	890	627.5
Angptl1	72713	1	156836606	156861011	3	6	19	185	4	0	0.052059772	0.068065535	1353	627.5
Fam107b	66540	2	3568711	3778231	0	1	26	590	2	0	0.031795378	0.068426939	843	631
Kif7	16576	7	79714117	79714117	0	0	1	0	1	0	0.068537344	0.068537344	1716	632
Mir701	735278	5	111002151	111004099	0	0	15	0	0	0	0.064272106	0.069025932	1620	633
Gm8439	667063	4	120586909	120609269	0	0	5	29	0	0	0.048783556	0.06922428	1266	635.5
Kcnq4	60613	4	120696431	120749806	3	0	3	60	0	0	0.046694621	0.06922428	1210	635.5
Nfyc	18046	4	120758957	120833114	0	2	21	68	0	0	0.047610866	0.06922428	1237	635.5
Mir30c-1	387227	4	120770188	120770196	0	0	2	0	0	0	0.06922428	0.06922428	1727	635.5
Ddx25	30959	9	35536824	35560482	40	0	1	29	2	0	0.055829556	0.069613392	1431	642.5
Hyls1	76832	9	35563879	35572005	0	0	1	5	0	0	0.057838651	0.069613392	1476.5	642.5
Gm3867	105244994	9	36257427	36260285	0	0	52	6	0	0	0.038648909	0.069613392	1028	642.5
Pate12	639025	9	36431073	36434662	1	0	6	14	1	0	0.05496294	0.069613392	1416	642.5
Pate11	671003	9	36473666	36477185	1	0	6	4	0	0	0.055981391	0.069613392	1435.5	642.5
Pate9	434396	9	36532837	36542427	12	0	3	45	1	1	0.060831686	0.069613392	1540	642.5
Pate8	100312948	9	36581303	36584598	0	0	4	1	1	0	0.069613392	0.069613392	1734	642.5
Pate14	235973	9	36637484	36692703	0	0	4	53	1	0	0.043384153	0.069613392	1133.5	642.5
1700027I24Rik	75567	9	36670128	36692703	0	0	0	22	0	0	0.043384153	0.069613392	1133.5	642.5
Acrv1	11451	9	36691860	36697430	0	0	2	2	0	0	0.069613392	0.069613392	1734	642.5
Gm20556	328576	15	84715568	84722244	0	0	14	46	0	0	0.057836786	0.069864275	1475	649
Arhgap8	73167	15	84718103	84772020	0	0	89	439	8	0	0.050968664	0.069864275	1318	649
Phf21b	271305	15	84785595	84857740	20	0	57	566	7	0	0.047965078	0.069864275	1243	649
Macc1	238455	12	119312672	119469642	3	13	32	489	7	0	0.05431487	0.070075698	1397	651.5
Tmem196	217951	12	119944184	120017648	0	0	7	231	0	0	0.05007801	0.070075698	1300	651.5
Pate4	56872	9	35609809	35609809	0	0	0	1	0	0	0.070083303	0.070083303	1747	653
Hells	15201	19	38941878	38941878	0	0	1	1	0	0	0.070162071	0.070162071	1750	654
Nup50	18141	15	84921574	84942870	20	5	34	182	7	1	0.04711503	0.070168603	1227	662
5031439G07Rik	223739	15	84944113	84990533	21	0	34	364	2	0	0.05322846	0.070168603	1379	662
Mir1249	100526461	15	84951479	84952817	0	0	11	0	0	0	0.065940925	0.070168603	1648	662
Upk3a	22270	15	85015719	85022078	0	0	3	4	0	0	0.062410304	0.070168603	1581	662
Fam118a	73225	15	85028162	85062583	3	0	40	148	3	0	0.046925464	0.070168603	1216	662
Smc1b	140557	15	85064799	85133608	1	1	37	335	5	0	0.053952794	0.070168603	1389	662
Ribc2	67747	15	85130235	85144415	2	1	14	69	2	0	0.061195124	0.070168603	1554	662
Gm19277	100502602	15	85150175	85158123	0	0	7	10	0	0	0.070168603	0.070168603	1751.5	662
Fbln1	14114	15	85206056	85277214	0	1	1	43	0	0	0.05817169	0.070168603	1485	662
Atxn10	54138	15	85334622	85462726	0	0	3	311	1	0	0.053488677	0.070168603	1382	662
Wnt7b	22422	15	85536910	85584274	3	0	8	54	1	0	0.053750208	0.070168603	1387	662
AU022754	105975	15	85579358	85593255	0	0	1	8	0	0	0.047049971	0.070168603	1225	662
Lncppara	102800312	15	85652301	85706255	0	0	6	75	0	0	0.065974507	0.070168603	1651	662
Mirlet7c-2	723966	15	85705235	85706255	0	0	3	0	0	0	0.069783066	0.070168603	1737	662
Mirlet7b	387245	15	85705555	85707472	0	0	12	0	0	0	0.070168603	0.070168603	1751.5	662
Chek1	12649	9	36708720	36728563	13	2	8	52	2	0	0.056184291	0.070173377	1443	670
Ppp1r3b	244416	8	35373799	35388087	30	6	43	55	4	0	0.055672944	0.070572808	1428	671
Grp	225642	18	65870927	65886095	0	0	15	55	2	0	0.052306208	0.070637575	1355	672
Mcat	223722	15	83560740	83560740	0	0	0	1	0	0	0.070965916	0.070965916	1757	673
Zfp334	228876	2	165374612	165390017	8	0	2	8	5	0	0.061769044	0.071132606	1569	674
Mir6354	102466632	1	169018979	169020599	0	0	7	0	0	0	0.070787431	0.07162341	1756	675
Ift22	67286	5	136906545	136914916	9	0	10	8	1	0	0.056022707	0.071771774	1437	677.5
4933404O12Rik	66752	5	136917379	136933504	0	0	11	130	0	0	0.045457356	0.071771774	1184	677.5
Fis1	66437	5	136951294	136966086	1	0	11	23	0	0	0.052973127	0.071771774	1369	677.5
Cldn15	60363	5	136966086	136975751	5	0	14	43	0	0	0.060629667	0.071771774	1537	677.5
Gda	14544	19	21394423	21475433	1	0	23	315	0	1	0.030479998	0.071789406	788	680
Adam1b	280667	5	121500522	121500522	1	0	0	0	0	0	0.071843658	0.071843658	1787	681
Gm3434	100041618	9	36134526	36137148	0	0	1	4	0	1	0.055981391	0.071922143	1435.5	682
Sox6os	68469	7	116030391	116030391	0	0	1	0	0	0	0.072183096	0.072183096	1793.5	683.5
1110004F10Rik	56372	7	116037854	116103361	0	1	2	41	0	0	0.05542309	0.072183096	1425	683.5
4921531P14Rik	70960	18	83302571	83302571	0	0	0	1	0	0	0.072227948	0.072227948	1795	685
Rpl30	19946	15	34441065	34445531	0	5	47	13	1	0	0.051601792	0.072304664	1332	687
Gm12191	666899	15	34441065	34444839	0	0	50	11	1	0	0.052874217	0.072304664	1366	687
4930413F20Rik	71637	15	34673217	34678208	0	0	8	16	0	0	0.060954024	0.072304664	1547	687
Adcy9	11515	16	4290575	4421703	0	0	1	43	1	0	0.061157892	0.072727138	1553	689
Znf41-ps	70005	4	145825920	145825920	0	0	0	1	0	0	0.072745992	0.072745992	1802	690
1700018A04Rik	71307	13	31588360	31588360	0	0	0	1	0	0	0.073117109	0.073117109	1810	691
Lhx4	16872	1	155699662	155753596	11	2	14	276	2	0	0.053571903	0.073355736	1383	694.5
Qsox1	104009	1	155778464	155814694	7	0	69	363	4	0	0.05075123	0.073355736	1311	694.5
Cep350	74081	1	155845086	155974716	7	0	57	951	33	0	0.052518651	0.073355736	1357	694.5
Tor1aip1	208263	1	156005073	156038154	7	6	73	185	8	0	0.054896108	0.073355736	1411	694.5
Tor1aip2	240832	1	156033414	156068710	58	11	71	197	19	0	0.054302262	0.073355736	1396	694.5
Fam163a	329274	1	156076339	156206855	40	0	16	824	3	0	0.028990147	0.073355736	747	694.5
Ccm2	216527	11	6546640	6596632	3	1	28	304	7	0	0.044692352	0.073358185	1165	698
Faap20	67513	4	155248354	155253043	1	1	10	13	1	0	0.054347289	0.073456319	1400	699
A630001G21Rik	319997	1	85717211	85780048	18	5	44	882	7	1	0.05009208	0.073965369	1301	700.5
Mir8096	102466882	1	85749986	85752140	0	0	37	0	0	0	0.067123947	0.073965369	1671	700.5
Fpr2	14289	17	17886334	17971431	0	2	19	279	4	0	0.000204078	0.074209886	59	702
Vmn1r225	171228	17	20500546	20502438	0	0	7	0	1	0	0.000441978	0.074275892	126	703
Gm3428	100041605	9	35849124	35852215	0	0	6	2	0	0	0.021843815	0.074392727	613.5	704
Pus3	67049	9	35560482	35566985	3	0	0	3	2	0	0.057838651	0.074455386	1476.5	705
Muc15	269328	2	110722280	110723714	0	0	0	2	0	0	0.05289478	0.074540064	1368	706
Cenpj	219103	14	56562230	56562230	0	0	0	1	0	0	0.074707487	0.074707487	1845	707
Dusp12	80915	1	170874666	170877694	0	0	0	9	0	0	0.048793824	0.074789368	1267	708
Nacad	192950	11	6597847	6607643	2	0	21	13	16	0	0.055142468	0.074796448	1420	709
Pate1	100312987	9	35685096	35688195	0	0	2	1	1	0	0.069613392	0.074823723	1734	710
Lgals9	16859	11	78963041	78986227	2	0	11	60	3	0	0.017414292	0.074941786	544	711
Mir6349	102466631	1	39187334	39188959	0	0	4	0	0	0	0.071148022	0.074970638	1760	712
Plbd2	71772	5	120493805	120503082	0	0	0	2	0	0	0.061353144	0.075050193	1558.5	713
Tectb	21684	19	55179845	55183314	0	0	4	1	0	0	0.0667242	0.075154844	1661	714.5
Gucy2g	73707	19	55204782	55232825	0	0	0	3	0	0	0.075154844	0.075154844	1857	714.5
Olfr748	258113	14	50709698	50709866	0	0	2	0	0	0	0.009450032	0.075785036	379	716
Zfp768	233890	7	127343052	127343052	1	0	0	0	0	0	0.075816929	0.075816929	1868.5	717
Crabp1	12903	9	54763056	54763056	0	0	1	0	0	0	0.075874563	0.075874563	1871	718
Cab39	12283	1	85792053	85851254	1	0	2	89	0	0	0.054234205	0.076346061	1395	719.5
Vwa3a	233813	7	120745113	120745113	0	0	0	1	0	0	0.076346061	0.076346061	1886	719.5
Oas1e	231699	5	120791067	120792155	0	0	0	2	0	0	0.060116979	0.07642174	1524.5	721
Tcp1	21454	17	12914584	12924889	2	0	4	9	0	0	0.034575267	0.076444175	923.5	722.5
Acat3	224530	17	12924821	12942116	0	1	7	14	2	0	0.034575267	0.076444175	923.5	722.5
Tsen15	66637	1	152371373	152388629	0	0	38	56	0	0	0.049441013	0.076542857	1283	724
Nrg1	211323	8	31815317	32808114	7	1	22	1253	9	0	0.048430472	0.076593214	1261	725
E230016M11Rik	320172	6	67035465	67077771	0	0	1	67	0	0	0.06398932	0.076738011	1610	727
Il23r	209590	6	67424180	67493571	0	1	27	451	4	0	0.025895392	0.076738011	690	727
Tacstd2	56753	6	67534282	67537796	4	1	19	0	0	0	0.06398932	0.076738011	1610	727
Znhit1	70103	5	136982264	136989705	1	6	18	9	1	0	0.064083042	0.076742839	1615.5	729
Kcne1	16509	16	92346076	92359069	23	1	1	105	1	0	0.051907232	0.076814969	1348	730
Ddx54	71990	5	120612476	120614733	0	0	1	1	0	0	0.064044138	0.076936001	1612	731
Ptprd	19266	4	76021994	77928694	0	0	0	25	0	0	0.06156123	0.077131598	1562	732
Trib1	211770	15	59656255	59656638	3	0	0	0	0	0	0.077274441	0.077274441	1907	734.5
Lratd2	399603	15	60822165	60827076	3	0	1	0	0	0	0.076820886	0.077274441	1896.5	734.5
9930014A18Rik	320469	15	60822165	60827076	0	0	3	1	0	0	0.076820886	0.077274441	1896.5	734.5
A1bg	117586	15	60897049	60924959	3	0	34	117	12	0	0.063613191	0.077274441	1601	734.5
Kif22	110033	7	127029212	127041080	0	0	2	3	0	0	0.05932556	0.077464321	1505	737
Hspa14	50497	2	3503117	3513207	9	1	13	29	4	0	0.057396309	0.077918659	1468	738.5
Cdnf	227526	2	3512102	3526357	6	0	5	59	7	0	0.056540927	0.077918659	1450	738.5
Bmp3	110075	5	98852855	98882963	2	0	1	7	0	0	0.060841888	0.078037132	1541	740
Kbtbd6	432879	14	79451995	79452831	0	1	1	0	3	0	0.062971137	0.078153015	1587	741
Gng12	14701	6	66896002	67020924	9	1	2	319	0	0	0.052753103	0.078281648	1363	742.5
Serbp1	66870	6	67244697	67286161	1	0	0	5	0	0	0.076738011	0.078281648	1895	742.5
Mir30e	723836	4	120772986	120774677	0	0	3	0	0	0	0.073366219	0.078361455	1818	744
Itgb8	320910	12	119158579	119238961	9	0	1	287	6	0	0.052535989	0.078369363	1358	745
Pate6	68171	9	35788716	35791490	2	1	4	1	0	0	0.068198483	0.078893786	1697	746
Plod3	26433	5	136985864	136995760	0	3	21	22	4	0	0.064083042	0.079080665	1615.5	747
Dnah6	330355	6	73040396	73101769	0	0	0	3	0	0	0.076275291	0.079093914	1882	748
Pate2	330921	9	35572005	35688195	3	2	6	182	0	0	0.03285317	0.07929738	878	751
Pate3	100312956	9	35645625	35649973	1	0	11	7	0	0	0.066821197	0.07929738	1663	751
Pate10	100312949	9	35739649	35742216	0	0	6	5	2	0	0.066521369	0.07929738	1658	751
Pate7	100312986	9	35776703	35791490	1	1	15	41	1	0	0.063576632	0.07929738	1598	751
Pate5	77080	9	35838582	35845994	1	0	6	16	1	0	0.021843815	0.07929738	613.5	751
Fpr1	14293	17	17876847	17885779	0	1	12	37	2	0	0.000353606	0.079480305	111	754
Gm13205	108168987	4	148948190	148948439	0	0	0	3	0	0	0.079732507	0.079732507	1960.5	755
Vmn2r93	627132	17	18297720	18331733	12	1	2	29	1	0	0.000304225	0.079785587	89	756.5
Vmn1r235	171233	17	21254616	21262757	2	3	10	10	0	0	0.000274826	0.079785587	84	756.5
Azin1	54375	15	38487574	38520474	3	0	5	15	0	0	0.057075363	0.080063994	1462	759.5
Baalc	118452	15	38931571	38952537	4	0	3	30	0	0	0.033684286	0.080063994	911	759.5
Dcaf13	223499	15	39111031	39146715	0	0	11	63	2	0	0.039211101	0.080063994	1047	759.5
Rims2	116838	15	39198074	39669232	0	0	34	811	3	0	0.038252435	0.080063994	1022	759.5
1700003G18Rik	69350	7	116083076	116094489	0	0	2	3	0	0	0.072183096	0.080170593	1793.5	762
Il12rb2	16162	6	67321115	67378133	0	0	1	4	0	0	0.065385396	0.080284667	1637	763
Vmn2r124	637021	17	18050404	18079293	45	0	0	81	7	0	0.000231015	0.080340206	67.5	767
Vmn2r91	665210	17	18083046	18136749	1	0	13	248	2	1	0.000517177	0.080340206	137	767
Vmn2r95	328759	17	18422888	18460736	56	0	8	118	5	0	0.000177924	0.080340206	52	767
Vmn1r224	665525	17	20417356	20419138	0	0	5	0	0	0	0.000339471	0.080340206	102	767
Vmn2r108	627805	17	20456657	20482810	37	0	10	49	5	0	0.000274167	0.080340206	81.5	767
Zfp160	224585	17	21006929	21042366	8	3	8	47	3	0	0.000231015	0.080340206	67.5	767
Gm5092	328766	17	21089459	21103070	0	0	30	67	0	0	0.000339206	0.080340206	101	767
Fzd6	14368	15	39017833	39037933	1	0	0	41	3	0	0.067355468	0.080358405	1675.5	771
Erich5	239368	15	34451332	34473752	12	15	40	194	11	0	0.024726884	0.080418642	660	772
Slc25a32	69906	15	39091405	39114673	48	0	3	52	2	0	0.060515353	0.080469079	1533	773
Dis3	72662	14	99075501	99101379	20	1	26	105	4	0	0.032375694	0.080473332	860	774.5
Klf5	12224	14	99296749	99313352	20	0	12	81	4	0	0.044830015	0.080473332	1168	774.5
Acot10	64833	15	20665669	20668735	0	1	23	0	4	0	0.061988147	0.080478448	1574	776
Zfp663	381405	2	165351385	165369947	5	0	5	43	7	0	0.061769044	0.080488354	1569	777
Rida	15473	15	34484049	34497207	3	0	37	66	0	0	0.034897725	0.080501357	927	778
Atp6v1c1	66335	15	38660560	38688009	0	0	2	17	0	0	0.061447043	0.080516959	1561	779
Pop1	67724	15	34493391	34530601	2	1	53	116	6	0	0.056635811	0.080584071	1451	780
Oas3	246727	5	120758864	120770199	0	0	0	3	1	0	0.065943478	0.080988551	1649	781
Ngdn	68966	14	55013684	55013684	0	0	1	0	0	0	0.081054095	0.081054095	1987	782
Syt1	20979	10	108498158	108872605	7	0	3	613	0	0	0.045233051	0.081134484	1174	783
Mir6413	102466647	10	20297653	20299498	0	0	4	0	0	0	0.07903356	0.081434256	1948	784
Mir30f	102466650	4	120771713	120771713	0	0	1	0	0	0	0.081674237	0.081674237	2008	785
Gadd45a	13197	6	67035465	67038502	1	0	3	0	0	0	0.06398932	0.081919909	1610	786
Stk32c	57740	7	139146684	139215297	0	0	23	590	0	0	0.036230006	0.082115535	954	787
2310043O21Rik	69679	15	38549906	38596640	0	0	4	81	0	0	0.041878317	0.082133752	1102	788
Ocstamp	74614	2	165396284	165401877	0	0	4	4	1	0	0.071132606	0.082143481	1759	789
9430069I07Rik	77358	15	34349168	34359781	1	0	39	94	4	0	0.050577891	0.082234546	1308	790
Adamtsl1	77739	4	85753247	86027279	0	0	0	7	0	0	0.077721669	0.08234588	1915	791
Pibf1	52023	14	99098169	99254271	2	2	73	1399	7	0	0.046981098	0.082405966	1223	792
Olfr523	258511	7	140174270	140177106	1	0	3	0	0	0	0.075901297	0.082921481	1873	793
Matn2	17181	15	34305083	34436025	21	6	31	1485	13	0	0.033070386	0.082975242	882	794.5
Nipal2	223473	15	34572807	34681145	30	4	45	1181	6	0	0.040611583	0.082975242	1075	794.5
Vmn2r92	627111	17	18150076	18188796	16	0	12	115	6	0	0.000707658	0.083030155	146	796
Bora	77744	14	99044371	99074493	37	0	19	269	16	0	0.030884459	0.083152686	816	797
Exoc6	107371	19	37542787	37660889	0	0	0	4	0	0	0.004767097	0.083198239	268	798
Zbtb16	235320	9	48659882	48837280	0	0	2	347	2	0	0.039417166	0.083245076	1051	803
Htr3a	15561	9	48899414	48911712	3	0	4	101	9	0	0.043777027	0.083245076	1141	803
Htr3b	57014	9	48935599	48966549	1	0	9	55	1	0	0.058371208	0.083245076	1489	803
Usp28	235323	9	48983414	49040861	0	0	40	66	3	0	0.035226382	0.083245076	938	803
Zw10	26951	9	49053761	49071434	0	0	4	10	0	0	0.059428171	0.083245076	1508	803
Tmprss5	80893	9	49080310	49117439	3	0	1	13	0	0	0.07151887	0.083245076	1763	803
Gm4894	235327	9	49251731	49278980	2	0	10	83	3	0	0.045288859	0.083245076	1177	803
Drd2	13489	9	49338690	49407977	4	0	20	202	0	0	0.043442679	0.083245076	1136	803
Ankk1	244859	9	49418669	49418669	0	0	0	0	1	0	0.083245076	0.083245076	2026	803
Iqck	434232	7	118952620	118954056	0	0	0	3	0	0	0.07623066	0.083266554	1880	808.5
Gprc5b	64297	7	118987621	118996224	0	0	1	2	0	0	0.082557998	0.083266554	2017	808.5
Idh3a	67834	9	54585084	54594240	0	0	2	2	0	0	0.076943011	0.08348381	1899	810
Gm29805	101056236	16	92381831	92381831	0	0	0	1	0	0	0.083684155	0.083684155	2041	811
Vmn2r94	665227	17	18241153	18279746	37	2	23	147	6	0	0.000430014	0.083827949	124	813
Vmn2r107	22312	17	20343265	20380917	39	1	11	130	4	0	0.00021344	0.083827949	60	813
Ppp2r1a	51792	17	20945610	20965000	2	0	40	90	3	0	0.000274167	0.083827949	81.5	813
Fbxw18	546161	9	109696669	109696669	0	0	0	1	0	0	0.083965938	0.083965938	2048	815
Stt3a	16430	9	36729883	36769547	6	1	20	199	4	0	0.054371975	0.084091841	1402	816
St6gal2	240119	17	55443457	55514336	19	1	19	169	1	0	0.028574837	0.084404805	740	817
Ybey	216119	10	76464669	76464669	0	0	0	1	0	0	0.084799175	0.084799175	2056.5	818
Zg16	69036	7	127050834	127088702	0	0	3	4	0	0	0.036130705	0.085244888	952	819
Rpl32l	621697	10	20206501	20208687	0	0	30	0	0	0	0.065349993	0.085265019	1635.5	820
Mir702	735283	5	136989705	136990909	0	0	4	0	0	0	0.080699036	0.08528646	1983	821
Fuom	69064	7	140099882	140104334	1	0	14	1	0	0	0.037431414	0.085521991	994	824.5
Echs1	93747	7	140106027	140118469	1	0	12	27	0	0	0.062254102	0.085521991	1577.5	824.5
Paox	212503	7	140113844	140137223	19	0	17	75	1	0	0.05479559	0.085521991	1410	824.5
Mtg1	212508	7	140135759	140150109	0	1	24	48	1	0	0.062254102	0.085521991	1577.5	824.5
Sprn	212518	7	140151742	140156850	1	5	25	8	0	0	0.070071733	0.085521991	1745	824.5
Olfr522	258954	7	140160151	140166636	3	6	7	0	1	0	0.063257725	0.085521991	1595	824.5
Fam243	75328	16	92322161	92322161	0	0	1	0	0	0	0.085545618	0.085545618	2071	828
Plaat1	27281	16	29210151	29223822	0	1	1	6	0	0	0.085644549	0.085644549	2073	829
Mzt1	76789	14	99034967	99048097	17	0	20	96	0	0	0.063013372	0.085852457	1590	830
Gm45924	105463124	15	38716048	38729694	0	0	4	81	0	0	0.067355468	0.085884512	1675.5	831
Disp3	242748	4	148240296	148289657	14	1	7	105	2	0	0.065471046	0.086300709	1641	832
Zfp747	269997	7	127374202	127376715	0	1	4	1	3	0	0.076718708	0.086798434	1894	834.5
9130019O22Rik	78921	7	127382322	127389095	25	1	28	16	17	1	0.012575729	0.086798434	458	834.5
E430018J23Rik	101604	7	127389766	127395596	38	1	14	9	10	0	0.064945808	0.086798434	1629	834.5
Zfp764	233893	7	127403746	127407977	5	0	5	1	2	0	0.074340495	0.086798434	1840	834.5
Npat	244879	9	53535735	53569091	0	0	1	2	1	0	0.054319667	0.087712668	1398.5	837
Mir6976	102466778	17	46554378	46554916	0	0	3	0	0	0	0.075105073	0.087803249	1851.5	838
Olfml2b	320078	1	170642872	170681764	0	4	6	17	1	0	0.068323293	0.087830241	1703	839.5
Atf6	226641	1	170707084	170867475	3	0	0	50	0	0	0.025457188	0.087830241	686	839.5
Gm33619	102636600	10	21181076	21186771	0	0	10	9	0	0	0.079179422	0.088325795	1955	841
Cthrc1	68588	15	39075506	39086777	1	0	9	12	2	0	0.080063994	0.088512251	1969	842
Ahi1	52906	10	20953087	21079896	4	4	51	558	3	0	0.030900747	0.088709911	817	843
Rad51d	19364	11	82876570	82892100	19	1	12	108	3	0	0.059647514	0.088836065	1513	845.5
Fndc8	78919	11	82890143	82900392	1	0	13	38	0	0	0.069549525	0.088836065	1731	845.5
Nle1	217011	11	82901365	82910356	2	2	68	55	7	0	0.073092977	0.088836065	1806	845.5
Unc45b	217012	11	82908564	82942983	3	2	37	200	10	0	0.061665839	0.088836065	1566	845.5
Rpia	19895	6	70765822	70794205	11	0	67	187	2	0	0.063090261	0.089570041	1592	848
Mylpf	17907	7	127208659	127208659	0	0	1	0	0	0	0.089643246	0.089643246	2131.5	849
Vmn1r231	171230	17	20890513	20891069	0	0	2	0	1	0	0.000353606	0.08981006	111	850
Gm16063	330183	5	119623992	119632549	0	0	25	35	0	1	0.000262656	0.089827864	75.5	856
Tbx3	21386	5	119668726	119683834	3	1	13	10	6	0	0.000262656	0.089827864	75.5	856
Tbx3os2	433944	5	119686790	119693217	0	0	5	7	0	0	0.000412322	0.089827864	122	856
Tbx5	21388	5	119830989	119884906	3	0	4	263	1	0	3.16E-05	0.089827864	24	856
Rita1	100764	5	120594376	120612476	1	1	1	2	0	0	0.060116979	0.089827864	1524.5	856
Oas1f	243262	5	120852975	120852975	0	0	0	1	0	0	0.089827864	0.089827864	2137.5	856
Oas1a	246730	5	120898378	120905250	0	0	0	2	1	0	0.061353144	0.089827864	1558.5	856
Rph3a	19894	5	120955169	121012007	0	1	8	97	0	0	0.063613246	0.089827864	1602	856
Ptpn11	19247	5	121132457	121193191	4	0	7	54	0	0	0.054424096	0.089827864	1403	856
Rpl6	19988	5	121202482	121208753	0	0	9	7	0	0	0.087205767	0.089827864	2097	856
Hectd4	269700	5	121218869	121367301	4	0	5	86	3	0	0.062635987	0.089827864	1584	856
Gpr139	209776	7	119140791	119176030	7	0	0	33	1	0	0.064973264	0.090128026	1630	862
Draxin	70433	4	148098471	148132520	54	0	13	305	8	0	0.04666837	0.090172107	1209	863
Spata31d1d	238663	13	59730883	59730883	0	0	0	1	0	0	0.090197984	0.090197984	2146	864
Atm	11920	9	53445623	53535735	0	0	1	11	1	0	0.054319667	0.090237722	1398.5	867.5
Cul5	75717	9	53619672	53670942	0	0	4	8	0	0	0.075461687	0.090237722	1864	867.5
Slc35f2	72022	9	53783120	53815624	0	0	1	20	1	0	0.058899806	0.090237722	1497	867.5
Elmod1	270162	9	53912019	53977011	1	0	13	142	1	0	0.043404489	0.090237722	1135	867.5
Tnfaip8l3	244882	9	54023524	54070230	22	0	7	88	0	0	0.073367826	0.090237722	1819	867.5
Cyp19a1	13075	9	54166300	54257351	3	0	1	116	0	0	0.080724253	0.090237722	1984	867.5
Tpcn1	252972	5	120536292	120571589	0	0	0	3	0	0	0.060116979	0.090294861	1524.5	871
Ccsap	73420	8	123841179	123862104	19	5	43	188	7	0	0.078674292	0.091001791	1940.5	873.5
Acta1	11459	8	123891997	123896510	2	0	11	14	3	0	0.078674292	0.091001791	1940.5	873.5
Nup133	234865	8	123897234	123951069	21	0	63	540	21	0	0.066156241	0.091001791	1652	873.5
Abcb10	56199	8	123952518	123985058	27	4	34	289	9	0	0.071443604	0.091001791	1761	873.5
Casz1	69743	4	148804059	148954205	4	2	9	252	4	1	0.049751424	0.091162942	1292	876
I0C0044D17Rik	545660	4	98824239	98824239	0	0	1	0	0	0	0.091172441	0.091172441	2169	877
Acsf3	257633	8	122773519	122814409	1	0	9	23	0	0	0.079962986	0.091269936	1965.5	880
Cdh15	12555	8	122850391	122866966	0	0	0	133	15	0	0.065114236	0.091269936	1632.5	880
Ankrd11	77087	8	122885213	123043819	13	0	6	194	12	0	0.070015093	0.091269936	1743	880
Spg7	234847	8	123061893	123097554	1	3	42	119	1	0	0.054654099	0.091269936	1406	880
Mir7079	102465654	8	123103568	123104973	0	0	8	0	0	0	0.083425533	0.091269936	2031.5	880
Kif2b	73470	11	91576565	91578091	0	0	3	0	2	0	0.069399345	0.091359931	1729	883
Srf	20807	17	46549074	46558017	1	0	22	24	0	0	0.075105073	0.091396497	1851.5	884
Masp2	17175	4	148610536	148614878	1	0	0	1	0	0	0.091548717	0.091548717	2177	885.5
Tardbp	230908	4	148614878	148627916	1	0	3	3	0	0	0.072806219	0.091548717	1803	885.5
AW549542	100993	5	119570487	119629131	0	0	20	166	0	0	0.00031562	0.091663127	93	887
Taf5l	102162	8	123996983	124023272	2	0	20	139	2	0	0.076060002	0.091741124	1877	888
1700060C20Rik	73399	2	158190012	158195336	0	0	37	39	0	0	0.06980566	0.092068264	1739.5	889
Dusp4	319520	8	34805304	34819639	5	2	15	93	8	0	0.058828211	0.092237577	1495	890.5
Tnks	21951	8	34827050	34967444	31	0	57	828	6	0	0.06158528	0.092237577	1564	890.5
4933412E24Rik	71088	15	60015229	60018609	0	0	2	0	4	0	0.0728772	0.092351523	1804	892
Spata19	75469	9	27395443	27395443	0	0	1	0	0	0	0.09260134	0.09260134	2199	893
Rpl13	270106	8	123100631	123104973	0	0	9	8	1	0	0.083425533	0.092760808	2031.5	894
3110009F21Rik	67280	12	110152984	110159943	0	0	30	50	0	0	0.079081184	0.092880965	1949	895
2310039H08Rik	67101	17	46770670	46773369	4	3	12	0	1	0	0.059990453	0.093068841	1520	896
Gldnos	73567	9	54283408	54290361	0	0	0	2	0	0	0.093907245	0.093907245	2220.5	898
Gldn	235379	9	54290361	54333508	0	0	0	4	0	0	0.083952418	0.093907245	2047	898
Acsbg1	94180	9	54621818	54663602	0	1	34	257	2	0	0.068707464	0.093907245	1720	898
Pelo	105083	13	115091013	115102737	0	0	4	4	0	0	0.088318712	0.093911066	2113	900
Aadacl4fm2	627085	4	144555843	144566388	0	0	5	18	1	0	0.077874782	0.093929687	1923.5	901
Aadacl4	435815	4	144611785	144623170	0	0	15	46	5	0	0.077037782	0.094053413	1903	902
Crhbp	12919	13	95438399	95438421	0	0	0	2	0	0	0.089698029	0.094135886	2133	903
Fbxo5	67141	10	5805119	5806609	0	0	5	2	0	0	0.086737496	0.094224226	2089	905
Mtrf1l	108853	10	5812077	5820726	13	0	9	28	2	1	0.063601565	0.094224226	1600	905
Rgs17	56533	10	5830613	5924185	2	0	2	337	0	0	0.050346037	0.094224226	1307	905
Ttc12	235330	9	49444484	49486330	0	0	1	5	0	0	0.077806468	0.094273101	1919.5	907
Mib2	76580	4	155669136	155669338	0	1	2	0	0	0	0.094337382	0.094337382	2232	908
Snord68	100302565	8	123101355	123102859	0	0	5	0	0	0	0.091269936	0.094753324	2172	909
Rbm22	66810	18	60565789	60571450	0	0	1	4	0	0	0.083340309	0.094812282	2030	910
Mtor	56717	4	148447318	148549466	0	1	9	66	2	0	0.065580444	0.094916839	1643	911
Kank4	242553	4	98815920	98815920	0	0	0	1	0	0	0.095355218	0.095355218	2247	912
Agtrap	11610	4	148077269	148089968	44	0	29	89	1	0	0.037447271	0.095390169	995	913
Trafd1	231712	5	121374215	121387290	2	1	12	9	2	0	0.068742797	0.095463231	1722	914
Snora20	100303746	17	12921477	12922498	0	0	2	0	0	0	0.056743892	0.095702917	1455	915
Ptcra	19208	17	46755723	46765598	9	3	16	75	7	0	0.066982264	0.095731504	1666	916
Serpine1	18787	5	137063724	137072479	0	0	1	13	4	0	0.076480744	0.095964496	1888	917.5
Muc3	666339	5	137138622	137167978	0	14	75	132	0	0	0.024844564	0.095964496	662	917.5
Exosc10	50912	4	148557756	148572123	0	0	5	8	0	0	0.044520489	0.095986234	1161	919
Vmn2r90	626942	17	17706216	17731769	0	0	0	10	0	0	0.09175325	0.096481307	2180.5	922
Spaca6	75202	17	17825196	17842956	1	0	16	19	1	0	0.06792202	0.096481307	1684	922
Mir99b	387230	17	17828469	17829726	0	0	5	0	0	0	0.096481307	0.096481307	2260.5	922
Mirlet7e	387248	17	17828469	17829726	0	0	5	0	0	0	0.096481307	0.096481307	2260.5	922
Mir125a	387235	17	17829414	17830611	0	0	5	0	0	0	0.09175325	0.096481307	2180.5	922
Aadacl4fm4	230890	4	144670678	144688300	0	0	16	112	2	0	0.045841382	0.097146593	1190	925
Cul7	66515	17	46648789	46664309	14	0	16	45	18	0	0.069735864	0.097224366	1736	926
Cfl1	12631	19	5489197	5494237	1	0	1	0	0	0	0.030800278	0.097274499	812	927
Pafah1b1	18472	11	74674482	74726540	9	2	4	188	0	0	0.06940258	0.097275454	1730	929.5
Mettl16	67493	11	74769330	74827707	38	0	11	78	2	0	0.043828443	0.097275454	1143	929.5
Mnt	17428	11	74829602	74844779	4	0	11	17	0	0	0.088266187	0.097275454	2109	929.5
Sgsm2	97761	11	74849689	74898055	2	0	1	23	1	0	0.080624687	0.097275454	1981	929.5
Mad2l2	71890	4	148128931	148145684	5	6	49	126	1	0	0.053143621	0.097357433	1378	932.5
Fbxo2	230904	4	148158703	148164584	0	1	9	22	1	0	0.063108782	0.097357433	1593	932.5
Nnmt	18113	9	48595586	48605285	0	0	1	2	0	0	0.085001161	0.097669602	2062	934
Slc45a4	106068	15	73577857	73647533	10	2	33	115	2	0	0.066608505	0.098215687	1659	936
Gpr20	239530	15	73694915	73708881	4	0	1	19	3	0	0.060074489	0.098215687	1522	936
Ptp4a3	19245	15	73721418	73758464	3	14	44	263	0	0	0.061322003	0.098215687	1557	936
Atp13a5	268878	16	29236197	29338583	1	0	0	20	1	0	0.082204699	0.098310111	2011	938
Iigp1	60440	18	60378750	60392083	1	2	23	42	1	0	0.075226437	0.098393846	1860	939
F2r	14062	13	95610145	95620254	0	0	1	2	0	0	0.098573743	0.098573743	2295.5	940.5
Iqgap2	544963	13	95629723	95889040	0	0	1	80	1	0	0.042717818	0.098573743	1117	940.5
Aadacl4fm5	329993	4	144777285	144788220	1	0	3	29	3	0	0.090918501	0.098752908	2162	942
Csnk1a1	93687	18	61580879	61588656	2	0	0	1	0	0	0.098874137	0.098874137	2303	943
Pex14	56273	4	148961294	149101198	2	0	2	288	3	0	0.058424986	0.098896651	1492	944
Acss3	380660	10	106952382	107122577	5	0	0	867	6	0	0.028192576	0.098981792	733	945
Pex6	224824	17	46709525	46725243	0	1	17	41	9	0	0.074132023	0.099043077	1830	946
Dffa	13347	4	149102322	149120235	7	0	9	116	2	0	0.063696583	0.099118251	1605	947
AAdacl4fm3	546849	4	144703482	144723386	0	0	27	80	3	0	0.049684324	0.099212056	1289	948
Rpl7l1	66229	17	46774248	46783770	9	3	6	77	7	0	0.060598601	0.099291715	1535	949.5
Trerf1	224829	17	47138909	47358786	0	0	53	2583	0	0	0.007143508	0.099291715	318	949.5
Ptk7	71461	17	46564486	46631463	5	0	22	537	19	1	0.016774424	0.099450908	530.5	954.5
Klc4	74764	17	46630786	46647924	2	0	21	114	5	0	0.069318807	0.099450908	1728	954.5
Mrpl2	27398	17	46644572	46649366	0	0	23	24	2	0	0.081644657	0.099450908	2007	954.5
Mea1	17256	17	46676926	46682884	2	1	13	13	0	0	0.05108222	0.099450908	1321.5	954.5
Ppp2r5d	21770	17	46683554	46707046	1	0	39	146	6	0	0.067453063	0.099450908	1679	954.5
Bicral	210982	17	46798607	46860481	12	1	53	581	14	0	0.013836145	0.099450908	478	954.5
Tbcc	72726	17	46888735	46891844	1	0	8	0	2	0	0.072173826	0.099450908	1792	954.5
Ubr2	224826	17	46928722	47012536	33	1	52	890	26	0	0.016774424	0.099450908	530.5	954.5
Ubiad1	71707	4	148434703	148445145	4	0	1	24	0	0	0.054913574	0.099508655	1412.5	959
Washc5	223593	15	59332797	59372874	0	0	0	10	1	0	0.067470404	0.099629759	1681	960.5
Nsmce2	68501	15	59372874	59601623	5	0	1	402	3	0	0.038577287	0.099629759	1027	960.5
Gm572	230909	4	148642229	148670383	0	0	1	15	0	0	0.079732507	0.099854512	1960.5	962
Igsf9b	235086	9	27297625	27357279	3	0	3	3	0	0	0.075042077	0.099896402	1850	963.5
Opcml	330908	9	27790694	28924325	10	0	30	3205	1	0	0.004552773	0.099896402	265	963.5
AA387883	100043450	19	52938774	52940525	0	0	0	2	0	0	0.091062272	0.099955676	2166	965
Fbxo44	230903	4	148153028	148162444	8	2	20	30	5	0	0.072111277	0.099980255	1791	966
Cox11	69802	11	90636185	90644059	0	0	16	14	2	0	0.029532125	0.100072915	761.5	967
Gnmt	14711	17	46726798	46731034	0	0	20	8	0	0	0.060543166	0.10020504	1534	968
Rrp36	224823	17	46667730	46676193	3	3	12	55	12	0	0.051780208	0.100335539	1344	969
Mroh5	268816	15	73761002	73841564	1	0	20	275	10	0	0.037741499	0.100498881	1008	970
Rexo2	104444	9	48469061	48482176	2	0	29	56	1	0	0.056125369	0.10062579	1439	971
Gm10684	100038468	9	45109339	45109339	0	0	0	1	0	0	0.101004804	0.101004804	2332	972
Wasl	73178	6	24639958	24656493	0	0	0	4	0	0	0.010959579	0.101448682	414	973
Ndufb4c	100041273	15	73810796	73811283	0	0	3	0	0	0	0.098215687	0.101583433	2286	974
Cort	12854	4	149125387	149127989	0	0	3	8	1	0	0.054913574	0.101965371	1412.5	975
1700081H04Rik	73477	5	119106354	119112212	0	0	4	4	0	0	0.0021526	0.102312486	196	976.5
Gm7538	665194	5	119197055	119201351	0	0	2	1	0	0	0.101977519	0.102312486	2347	976.5
Trim26	22670	17	36835265	36858955	6	3	51	119	6	0	0.079610503	0.102376842	1959	979
Trim40	195359	17	36881855	36892085	11	4	16	82	2	0	0.08545448	0.102376842	2070	979
Znrd1as	76416	17	36957463	36965041	0	1	26	36	5	0	0.088323255	0.102376842	2115	979
Dlg1	13383	16	31661638	31874202	4	2	43	600	6	0	7.84E-05	0.102516867	35	981
Ralgapa1	56784	12	55642956	55815707	0	0	1	8	0	0	0.082896142	0.102675197	2021	983
Gm19990	100503961	12	56251313	56265391	0	0	20	101	0	0	0.063136624	0.102675197	1594	983
Mbip	217588	12	56329177	56347766	0	1	6	38	1	0	0.077146574	0.102675197	1906	983
Prph2	19133	17	46908522	46924841	10	1	23	198	8	0	0.028568968	0.102703327	739	985
Angptl7	654812	4	148496080	148500125	1	0	0	3	2	0	0.083937913	0.102729986	2046	986
Ntrk2	18212	13	58876973	59125593	0	0	0	46	0	0	0.008453582	0.103081964	357	988
Spata31d1b	238662	13	59712455	59712455	0	0	1	0	1	0	0.103081964	0.103081964	2374	988
Tut7	214290	13	59764282	59789337	0	0	0	4	0	0	0.096571844	0.103081964	2263.5	988
Cnpy3	72029	17	46735707	46753956	12	2	27	138	4	0	0.006791538	0.103166953	311	990
Zfp474	66758	18	52614664	52639481	1	2	8	94	1	0	0.087851897	0.103504582	2105	991.5
Sncaip	67847	18	52796013	52893925	0	0	0	3	0	0	0.103214535	0.103504582	2377	991.5
F2rl1	14063	13	95513386	95523975	0	0	0	3	1	0	0.098573743	0.103526134	2295.5	993.5
F2rl2	14064	13	95700483	95702110	1	0	0	1	0	0	0.098573743	0.103526134	2295.5	993.5
Ston2	108800	12	91633241	91788380	41	3	28	962	14	0	0.03010679	0.103785789	776	995
Cenps	69928	4	149127237	149139604	0	0	5	6	0	0	0.074040176	0.103849568	1826	996
Inpp5a	212111	7	139389720	139578772	2	0	4	147	1	0	0.087860916	0.104042503	2106	998.5
Nkx6-2	14912	7	139579981	139583999	1	1	4	2	0	0	0.089952978	0.104042503	2141	998.5
Cfap46	212124	7	139601929	139684527	9	0	22	360	17	0	0.078225902	0.104042503	1934	998.5
Mir6401	102465215	7	139777799	139778536	0	0	4	0	0	0	0.091075031	0.104042503	2167	998.5
Klhdc3	71765	17	46674558	46682884	4	1	11	18	3	0	0.05108222	0.104194248	1321.5	1001
Urb2	382038	8	124019707	124048486	12	1	25	213	27	0	0.076884969	0.104336438	1898	1002
Trim56	384309	5	137108074	137117992	11	0	5	0	5	0	0.078865587	0.10512052	1943	1003
Smoc1	64075	12	81029532	81186071	2	0	0	180	2	0	0.033608168	0.105145478	907	1009.5
Mir3067	100526532	12	81164308	81166184	0	0	11	0	0	0	0.101168503	0.105145478	2334.5	1009.5
Slc8a3	110893	12	81202727	81327347	0	0	0	12	0	0	0.081235194	0.105145478	1997	1009.5
Gm3693	100042143	12	81226865	81226865	0	0	1	0	0	0	0.105145478	0.105145478	2413.5	1009.5
Gm20498	105940408	12	81359479	81530992	0	0	0	13	0	0	0.104087162	0.105145478	2391.5	1009.5
Adam4	11498	12	81420475	81420475	0	0	0	0	1	0	0.105145478	0.105145478	2413.5	1009.5
Synj2bp	24071	12	81498162	81530992	1	0	0	2	0	0	0.104087162	0.105145478	2391.5	1009.5
Adam21	56622	12	81559592	81570354	0	0	3	12	1	0	0.101168503	0.105145478	2334.5	1009.5
Med6	69792	12	81574201	81596674	0	0	24	117	0	0	0.0598102	0.105145478	1517	1009.5
Ttc9	69480	12	81629330	81662316	0	0	12	172	0	0	0.083649535	0.105145478	2039	1009.5
Map3k9	338372	12	81723038	81771536	0	0	0	6	0	0	0.102310181	0.105145478	2357	1009.5
Pcnx	54604	12	81869771	81998019	1	0	0	7	0	0	0.080525558	0.105145478	1979	1009.5
Lmbr1l	74775	15	98915617	98915617	0	0	0	1	0	0	0.105268205	0.105268205	2416	1016
Mir690	751543	16	28600159	28601091	0	0	5	0	0	0	0.086867018	0.105698759	2090	1017
Insm2	56856	12	55600372	55600372	0	0	0	0	1	0	0.105730658	0.105730658	2423	1018
Rbm7	67010	9	48489361	48497104	3	0	4	11	2	0	0.077806468	0.105872928	1919.5	1019
Vmn2r102	224572	17	19658330	19704534	66	1	8	144	12	1	0.000198066	0.106218022	56	1020
Arid2	77044	15	96298523	96376854	0	0	3	19	0	0	0.056131022	0.106594925	1440.5	1021.5
Slc38a1	105727	15	96572017	96644835	39	10	25	492	7	0	0.012495384	0.106594925	455	1021.5
Ulk4	209012	9	120961782	121279123	20	0	71	1441	16	0	0.030238085	0.106860578	778	1023
Hyal6	74409	6	24737051	24739164	0	0	0	2	0	0	0.038854305	0.106895527	1034	1024
Slc10a6	75750	5	103605801	103629782	3	1	3	62	3	0	0.092619696	0.106924827	2201	1025
Aadacl4fm1	381572	4	144518442	144528995	0	0	9	24	5	0	0.077874782	0.106948917	1923.5	1026
Smim3	106878	18	60474251	60496411	3	0	0	102	0	0	0.079134518	0.107170621	1953	1027
Mrtfb	239719	16	13282291	13341531	0	0	0	2	0	0	0.0225949	0.107372507	625	1028
Acat1	110446	9	53592963	53607745	0	0	0	4	0	0	0.090237722	0.107392701	2148.5	1029
Utp6	216987	11	79935912	79961417	1	0	0	3	0	0	0.010137126	0.107534919	391	1030
Vmn1r48	113845	6	90038796	90038796	0	0	1	0	0	0	0.107810673	0.107810673	2463	1031
Znrd1	66136	17	36954412	36960442	1	0	5	4	0	0	0.098592822	0.10781323	2299	1032
Pyroxd2	74580	19	42749041	42749041	0	0	0	1	0	0	0.107813274	0.107813274	2464	1033
Unc93a	381058	17	13108656	13133770	4	0	4	14	2	0	0.042686539	0.107905135	1116	1034
Hamp2	66438	7	30925357	30925357	0	0	1	0	0	0	0.108290014	0.108290014	2470	1035
F830016B08Rik	240328	18	60295037	60295046	0	0	0	2	0	0	0.098393846	0.108490296	2288	1036
Rfk	54391	19	17392775	17401274	4	0	6	2	1	0	0.095807838	0.108512869	2254	1037
Cox16	66272	12	81359479	81483777	0	0	0	10	0	0	0.1045397	0.108700182	2399	1038
Zmym5	219105	14	56797389	56797389	0	0	0	1	0	0	0.108761658	0.108761658	2477	1039
Elmod3	232089	6	72571700	72571700	0	0	0	1	0	0	0.1088095	0.1088095	2479	1040
Hivep3	16656	4	119732190	120137437	12	1	24	915	2	0	0.028094064	0.109176118	732	1041
Nudt7	67528	8	114144445	114144445	0	0	0	1	0	0	0.109342077	0.109342077	2495	1042
1700067G17Rik	73475	1	89014431	89021878	0	0	5	5	0	0	0.088411441	0.109756298	2119	1043
Xpnpep1	170750	19	52938774	53032642	9	1	54	328	2	0	0.078786744	0.109793718	1942	1044.5
Mir6407	102465220	19	53010873	53011565	0	0	3	0	0	0	0.109793718	0.109793718	2502	1044.5
Dhrs3	20148	4	144890835	144928045	5	1	27	199	1	0	0.067323338	0.10996568	1674	1046
Gm13119	433779	4	144356217	144363503	0	1	18	17	8	0	0.085254092	0.110464594	2069	1047.5
Pramef20	627009	4	144372935	144378837	0	0	7	21	5	0	0.093719512	0.110464594	2219	1047.5
Chsy3	78923	18	59173704	59534490	11	0	1	1430	4	0	0.052984189	0.110534405	1371	1049
Tom1l1	71943	11	90643616	90683965	5	0	4	77	3	0	0.029532125	0.111030099	761.5	1050
Fam168b	214469	1	34813438	34844964	19	0	5	77	0	0	0.027353111	0.111596094	716	1051
Adora1	11539	1	134203883	134232574	0	0	0	64	0	0	0.111009389	0.111910834	2529	1052
Mapk10	26414	5	102908668	103210800	26	2	45	777	1	0	0.047953783	0.112165049	1242	1053
Vgf	381677	5	137025586	137032953	1	0	1	0	2	0	0.100975915	0.112167889	2331	1054
Adipor1	72674	1	134420271	134433246	1	0	0	3	0	0	0.049929223	0.11225898	1297	1055
1700012P22Rik	69364	4	144418350	144440557	1	1	10	106	0	0	0.069787664	0.11225953	1738	1056
C87977	97187	4	144206937	144215305	8	8	32	24	1	0	0.055028502	0.112306568	1417	1057
LOC106557447	106557447	4	88914450	88914450	0	0	0	1	0	0	0.112480281	0.112480281	2559	1058
Colec10	239447	15	54408946	54466090	13	0	15	145	2	0	0.07650733	0.112576956	1889	1059
Myog	17928	1	134288267	134291563	0	0	2	2	0	0	0.111910834	0.112655527	2547.5	1062
Ppfia4	68507	1	134297370	134334337	5	1	42	153	7	0	0.086943431	0.112655527	2093	1062
Tmem183a	57439	1	134347260	134361149	2	0	5	12	0	0	0.088301513	0.112655527	2112	1062
Mgat4f	240755	1	134385730	134388460	0	0	1	1	0	0	0.112655527	0.112655527	2562.5	1062
Cyb5r1	72017	1	134405719	134411467	3	0	1	1	1	0	0.111910834	0.112655527	2547.5	1062
Oog3	100012	4	144157685	144164548	2	0	21	29	9	0	0.088843439	0.113057021	2123	1065
Pramef12	77632	4	144391845	144410442	4	2	19	73	4	0	0.034223017	0.113379133	920	1066
Ulk2	29869	11	61776021	61857044	3	1	35	287	4	0	0.055387503	0.113528318	1424	1072
Akap10	56697	11	61871389	61928696	8	0	6	53	2	0	0.059964805	0.113528318	1519	1072
Specc1	432572	11	61955204	62222524	27	1	73	1314	1	0	0.030532708	0.113528318	790	1072
Adora2b	11541	11	62247326	62265370	0	0	1	32	2	0	0.085804963	0.113528318	2074	1072
Zswim7	69747	11	62269277	62282561	0	0	1	7	0	0	0.029049274	0.113528318	749	1072
Ttc19	72795	11	62279764	62326774	2	0	4	40	0	0	0.0779119	0.113528318	1925	1072
Ncor1	20185	11	62318652	62459653	6	0	54	200	3	0	0.043974939	0.113528318	1145	1072
Pigl	327942	11	62456691	62511153	0	0	4	44	0	0	0.077816339	0.113528318	1921	1072
Cenpv	73139	11	62525409	62540859	0	0	7	23	0	0	0.09150274	0.113528318	2175	1072
Trpv2	22368	11	62573549	62598352	0	2	8	43	1	0	0.083657728	0.113528318	2040	1072
Lrrc75a	192976	11	62605058	62650366	5	0	2	220	2	0	0.052651766	0.113528318	1361	1072
Mb21d2	239796	16	28826399	28931579	1	0	11	367	2	0	0.083725625	0.113621205	2042	1078
Zmynd8	228880	2	165784626	165900450	5	2	35	394	4	0	0.056993059	0.113635671	1460	1079.5
Ncoa3	17979	2	165990927	166073101	6	0	7	83	7	0	0.086588611	0.113635671	2086.5	1079.5
Tnfrsf1b	21938	4	145213475	145248773	22	0	19	192	13	0	0.076560783	0.113810569	1891	1081
Tnfrsf8	21941	4	145267981	145317140	7	0	22	258	11	0	0.043874378	0.113855704	1144	1082
Gm13089	277667	4	143696951	143704676	0	4	62	85	24	0	0.091257477	0.11410494	2170.5	1083
1700019N19Rik	67507	19	58787174	58796204	0	0	1	32	0	0	0.090746338	0.114203693	2157.5	1084
Gm13043	545693	4	143509447	143511592	0	0	42	4	0	0	0.059394645	0.114256614	1507	1085
Minar2	225583	18	59060622	59076675	7	1	5	42	0	0	0.086185449	0.114419939	2076	1086
Isca1	69046	13	59764282	59765083	0	0	0	2	0	0	0.096571844	0.114437871	2263.5	1087
Cd3g	12502	9	44978824	44978824	0	0	0	1	0	0	0.114865569	0.114865569	2611	1088
Vps13d	230895	4	144972838	145196707	18	1	112	1327	35	0	0.045348173	0.114886791	1182	1089
Sfta3-ps	104798	12	56495020	56530826	0	0	16	76	0	0	0.050892916	0.114957726	1314	1090
Zfp987	626316	4	146097081	146122840	0	0	2	17	0	0	0.042217541	0.115164816	1107	1091
Mir6355	102465182	18	59578931	59579820	0	0	4	0	0	0	0.110534405	0.115341099	2517	1092
Pramef17	626943	4	143991490	143996246	0	0	10	8	1	0	0.074093723	0.115715485	1829	1093.5
Pramel4	347710	4	144057339	144069101	4	0	7	25	1	0	0.088344738	0.115715485	2116	1093.5
Gm13078	277666	4	143717475	143729012	3	0	27	129	11	0	0.051215754	0.115941804	1325	1095
Atp5g2	67942	15	102671893	102671893	0	1	1	0	0	0	0.116188023	0.116188023	2657.5	1096.5
Mir688	751542	15	102671893	102671893	0	0	1	0	0	0	0.116188023	0.116188023	2657.5	1096.5
Ube4a	140630	9	44957475	44957475	0	0	0	1	0	0	0.116348738	0.116348738	2659	1098
Ap1s1	11769	5	137035404	137047797	1	1	2	5	0	0	0.06554258	0.116416471	1642	1099
Prr18	320111	17	8339924	8343754	4	1	2	2	2	0	0.116527167	0.116527167	2662.5	1100
Gm4841	225594	18	60270157	60271329	0	0	0	1	5	0	0.107081185	0.116784445	2452	1101
Fer1l6	631797	15	58508202	58606352	0	0	6	368	4	0	0.057005874	0.117106737	1461	1102
Zfp64	22722	2	168893359	168957325	16	1	18	336	12	0	0.027702371	0.117143359	726	1103
Rab39	270160	9	53685003	53696024	1	0	0	4	0	0	0.090237722	0.117548486	2148.5	1104
Gm13084	381569	4	143809336	143818005	4	0	13	34	6	0	0.035030235	0.117689898	930	1105
Gm13083	279185	4	143613023	143618558	14	0	17	8	14	0	0.081188106	0.118142847	1994	1106
Gm4951	240327	18	60211011	60242382	0	0	1	16	0	0	0.094812282	0.118265958	2240.5	1107
Olfr51	18351	11	51006660	51006660	0	0	1	0	0	0	0.118325504	0.118325504	2697	1108
Olfr403	404316	11	74195022	74196434	0	0	1	0	2	0	0.115442757	0.118457828	2630.5	1109
Nfkb1	18033	3	135627767	135627767	0	0	0	1	0	0	0.118598264	0.118598264	2705	1110
Scpep1os	73921	11	88928081	88935809	0	0	0	90	0	0	0.09323448	0.11886695	2210	1112
Elobl	217066	11	88964843	88968871	0	2	16	9	2	0	0.044318198	0.11886695	1153.5	1112
2210409E12Rik	72381	11	88970690	88972721	0	0	15	0	0	0	0.098691503	0.11886695	2300	1112
Celsr1	12614	15	85973896	85973896	0	0	0	1	0	0	0.118916062	0.118916062	2722	1114
Pramel5	384077	4	144270978	144280530	1	1	14	35	3	0	0.091257477	0.119133253	2170.5	1115
Aadacl3	230883	4	144454171	144465744	6	0	14	61	4	0	0.07296787	0.119331421	1805	1116
Fat4	329628	3	38890061	39007969	0	0	1	17	2	0	0.097400213	0.11955755	2271	1117
Marchf11	211147	15	26307224	26409371	7	0	11	459	2	0	0.064133079	0.119605849	1618	1118
Fgf12	14167	16	28173319	28753947	0	0	3	1242	0	0	0.080128357	0.119679875	1970	1119
E2f1	13555	2	154561517	154561517	0	0	0	1	0	0	0.119854323	0.119854323	2745	1120
Jaml	270152	9	45078453	45103403	0	0	3	8	0	0	0.114865569	0.1202521	2611	1121
1110019D14Rik	76311	6	13901905	14043025	0	0	0	736	0	0	0.079170626	0.120443257	1954	1122
Gm17660	100271704	5	104070275	104077835	0	3	8	89	0	0	0.020921194	0.120754279	601.5	1123
Nos1	18125	5	117843450	117957510	16	2	9	501	6	0	0.088322786	0.120973515	2114	1127
Fbxo21	231670	5	117974747	118009855	7	0	15	127	4	0	0.092291101	0.120973515	2191	1127
Tesc	57816	5	118026050	118061434	1	0	39	156	2	1	0.083531101	0.120973515	2036	1127
Fbxw8	231672	5	118065335	118156935	4	0	2	186	1	0	0.098895329	0.120973515	2304	1127
Hrk	12123	5	118163128	118188828	4	0	8	11	0	0	0.090502214	0.120973515	2153	1127
Rnft2	269695	5	118190824	118247097	10	0	7	29	0	0	0.084950127	0.120973515	2061	1127
2410131K14Rik	76792	5	118243324	118266025	21	0	3	42	0	0	0.101220864	0.120973515	2336	1127
Dennd3	105841	15	73511232	73569395	0	0	46	249	4	0	0.046953493	0.121224855	1217	1131
Hirip3	233876	7	126863987	126864046	0	0	2	0	2	0	0.078147007	0.121522974	1929.5	1132
Nr2f2	11819	7	70357647	70364368	0	0	0	3	0	0	0.102271561	0.121551597	2355.5	1133
Uap1	107652	1	170142109	170176934	3	0	29	98	3	0	0.071768017	0.121640889	1766.5	1134
Fbxo6	50762	4	148146289	148154112	0	9	27	43	5	0	0.074183051	0.121691555	1834	1135
Hdlbp	110611	1	93459056	93459056	0	0	0	1	0	0	0.121952421	0.121952421	2784	1136
Uhmk1	16589	1	170193866	170217173	16	0	7	26	1	0	0.071768017	0.122059859	1766.5	1137
Gm10745	100038545	3	11835791	11835791	0	0	0	1	0	0	0.12225064	0.12225064	2791	1138
BC080695	329986	4	143567732	143573764	10	0	0	47	15	0	0.073272089	0.122305038	1813	1139
Cdk17	237459	10	93262902	93262902	0	0	0	1	0	0	0.122701374	0.122701374	2807.5	1140.5
Elk3	13713	10	93262902	93262902	0	0	0	1	0	0	0.122701374	0.122701374	2807.5	1140.5
Gm13103	194225	4	143844538	143847779	0	0	10	8	0	0	0.106681282	0.123107851	2446	1143.5
Pramef6	195555	4	143894350	143902253	4	1	20	21	3	0	0.083923355	0.123107851	2045	1143.5
Oog2	381570	4	144188733	144196900	6	2	17	27	5	0	0.071052235	0.123107851	1758	1143.5
Gm13128	626995	4	144328578	144333094	0	0	8	7	1	0	0.091016027	0.123107851	2165	1143.5
Pramef25	329984	4	143948590	143952831	3	2	30	4	8	0	0.059911621	0.123129529	1518	1146
Gm13088	277668	4	143654048	143659124	1	0	11	4	2	0	0.106016234	0.12330596	2428	1147
Acbd7	78245	2	3338776	3338776	0	0	0	1	0	0	0.123312179	0.123312179	2818	1148
Gm13102	100041077	4	144108113	144108113	0	0	0	1	0	0	0.123504069	0.123504069	2823	1149
Chrac1	93696	15	73090362	73096965	0	1	2	13	0	0	0.100684319	0.123557463	2329	1151
Ago2	239528	15	73096294	73186408	23	0	9	130	2	0	0.079430426	0.123557463	1956	1151
Ptk2	14083	15	73209242	73423886	0	1	12	99	1	0	0.063302305	0.123557463	1596	1151
Bpifb6	228796	2	153898432	153912742	2	2	26	37	3	0	0.10704267	0.123730216	2450.5	1154
Bpifb3	378700	2	153916246	153922559	0	0	21	25	0	0	0.10704267	0.123730216	2450.5	1154
Bpifa2	19194	2	154006482	154014671	0	0	11	9	0	0	0.094305825	0.123730216	2231	1154
Galnt1	14423	18	24203615	24286089	2	1	21	247	1	0	0.058393447	0.12377578	1490.5	1156
Psma6	26443	12	55387917	55417659	0	0	7	32	0	0	0.089267289	0.12400471	2126	1157.5
Nfkbia	18035	12	55491545	55494309	0	0	12	3	1	0	0.099938747	0.12400471	2321	1157.5
Mal2	105853	15	54570331	54602738	4	1	3	103	0	0	0.079099741	0.124231798	1950	1159
Pantr1	66297	1	42592809	42692231	0	0	10	190	0	0	0.092812662	0.124372601	2203	1160
Gm13023	194227	4	143787396	143795316	1	0	5	15	7	0	0.103469248	0.124416949	2384	1161
Tcf7l1	21415	6	72639155	72754144	0	0	0	5	0	0	0.03485057	0.124570929	926	1162
Mpzl3	319742	9	45073729	45075863	1	0	0	2	0	0	0.114865569	0.124983671	2611	1163
Dmrt1	50796	19	25506941	25604220	5	0	0	251	0	0	0.055968643	0.125091176	1433	1165
Dmrt3	240590	19	25608804	25622791	0	1	6	62	3	0	0.057339426	0.125091176	1466	1165
Dmrt2	226049	19	25670532	25672354	0	0	9	0	0	0	0.103261776	0.125091176	2379.5	1165
Alox12b	11686	11	69159684	69159684	0	0	0	1	0	0	0.12522357	0.12522357	2862	1167
Tasor	218850	14	27473997	27473997	0	0	0	1	0	0	0.125360435	0.125360435	2864	1168
Igf2bp3	140488	6	49143367	49143367	0	0	0	1	0	0	0.125371748	0.125371748	2865	1169
Scpep1	74617	11	88928081	88957446	0	2	38	368	11	0	0.06802425	0.125373685	1686	1173
Coil	12812	11	88968331	88991435	7	7	70	177	11	0	0.044318198	0.125373685	1153.5	1173
Trim25	217069	11	88997401	89020247	21	2	8	107	15	0	0.068333824	0.125373685	1704	1173
Dgke	56077	11	89035231	89068464	52	5	27	262	3	0	0.075148753	0.125373685	1855.5	1173
Dgkeos	414094	11	89062856	89067233	0	0	55	33	0	0	0.075148753	0.125373685	1855.5	1173
Gm525	217071	11	89071873	89092988	5	1	26	188	0	1	0.087009629	0.125373685	2094	1173
Ankfn1	382543	11	89390299	89842956	29	1	64	2381	19	0	0.071993949	0.125373685	1790	1173
Fv1	14349	4	147867180	147870174	0	0	12	0	3	0	0.105360349	0.125458497	2420	1177
Atp6v1b1	110935	6	83744414	83744414	0	0	0	1	0	0	0.125636435	0.125636435	2881.5	1178
Gm29683	624549	7	70200571	70339664	0	0	2	16	0	0	0.053624508	0.125754611	1385	1179
4933438K21Rik	71270	4	147065282	147070346	0	0	10	6	0	0	0.047631395	0.126009903	1238	1180
2610016A17Rik	100503074	19	25671823	25672354	0	0	1	3	0	0	0.103261776	0.126150036	2379.5	1181
Bpifa6	545477	2	153976967	154000346	1	0	0	17	2	0	0.123730216	0.12617652	2828.5	1182
Slc39a6	106957	18	24586384	24600090	0	0	1	3	0	0	0.119146402	0.126350343	2732	1183
Lin37	75660	7	30556435	30561543	0	0	5	1	0	0	0.031808414	0.126559827	844	1184
Gpam	14732	19	55072624	55111647	0	0	0	3	0	0	0.08108383	0.126598443	1988	1185
Raet1d	56554	10	22362352	22372412	0	1	0	7	0	0	0.09555238	0.126702651	2249	1186
Sv2c	75209	13	95968640	96089770	0	0	1	14	0	0	0.098573743	0.126725232	2295.5	1187
Elp2	58523	18	24629895	24637947	0	0	0	2	1	0	0.119146402	0.126759005	2732	1188
Nog	18121	11	89301042	89304163	2	3	9	0	3	0	0.098357801	0.127127868	2287	1189
Cep120	225523	18	53701398	53701438	0	0	0	2	0	0	0.112970403	0.127202255	2567.5	1190
Vmn1r236	171235	17	21285215	21286668	0	0	2	0	1	0	0.000460992	0.127210528	131.5	1191
Cap2	67252	13	46500075	46638044	0	0	2	12	0	0	0.113577727	0.127500229	2576	1192
Clic5	224796	17	44186811	44279919	43	1	55	946	5	0	0.048999232	0.128314619	1270	1193
Pcsk6	18553	7	65868085	65956307	0	0	1	5	0	0	0.106514956	0.128321578	2441	1194
Rprd1a	225283	18	24498934	24527027	0	0	0	2	0	0	0.119146402	0.128332315	2732	1195
Zfp600	667666	4	146157194	146192149	0	0	1	11	0	0	0.09157757	0.12844464	2178	1196
Kif13a	16553	13	46752517	46861527	0	0	1	18	1	0	0.11386015	0.128619925	2586	1197
Grap	71520	11	61652496	61672780	13	0	9	52	1	0	0.099500656	0.129098615	2309.5	1199.5
Slc5a10	109342	11	61672975	61719727	1	0	0	323	5	0	0.051870621	0.129098615	1347	1199.5
Fam83g	69640	11	61682513	61709718	7	1	6	117	8	0	0.090572836	0.129098615	2155	1199.5
Prpsap2	212627	11	61730975	61759454	0	0	0	34	0	0	0.099500656	0.129098615	2309.5	1199.5
Zfp990	101056073	4	145510125	145535348	0	0	3	35	0	0	0.057087865	0.129316207	1463	1202
E130006D01Rik	269683	5	111742163	111762026	0	0	1	5	0	0	0.053384501	0.129569324	1381	1203
Cnot10	78893	9	114586041	114629249	1	0	0	5	0	0	0.129589325	0.129589325	2962	1204
Rps19-ps3	277692	4	147822005	147824053	0	0	37	0	0	0	0.10446753	0.129837566	2397	1206.5
Mfn2	170731	4	147873779	147906661	14	3	43	160	5	0	0.060262205	0.129837566	1530	1206.5
Clcn6	26372	4	148004305	148040743	12	1	14	240	11	0	0.075875212	0.129837566	1872	1206.5
Mthfr	17769	4	148037123	148059352	19	4	49	100	3	0	0.095114064	0.129837566	2245	1206.5
Mir151	387169	15	73255587	73255587	0	0	1	0	0	0	0.129872006	0.129872006	2965	1209
Mir7663	102465768	10	22730198	22730198	0	0	1	0	0	0	0.13015859	0.13015859	2972.5	1210
Cldn4	12740	5	134947296	134947296	0	0	1	0	0	0	0.13032143	0.13032143	2980	1211
Cyp17a1	13074	19	46667167	46674596	3	0	12	14	3	0	0.122616847	0.130527314	2805	1212.5
Borcs7	66439	19	46690558	46694950	0	0	0	14	0	0	0.128068063	0.130527314	2939	1212.5
Gm12128	100039148	11	37660328	37671938	0	0	0	15	0	0	0.111968562	0.130574771	2549	1214
Zfp981	100041433	4	146500087	146539158	21	3	44	498	5	0	0.0386984	0.13071766	1029.5	1215
Dpyd	99586	3	118610867	118674896	0	0	0	4	0	0	0.126750952	0.130734616	2917	1216
Enpp4	224794	17	44096471	44107752	19	1	28	22	2	0	0.103107516	0.13087989	2376	1217
1700095A21Rik	67524	4	146519933	146543493	0	0	0	425	0	0	0.0386984	0.130931723	1029.5	1218
Kat8	67773	7	127915482	127924577	0	0	0	1	1	0	0.042840573	0.130946716	1118.5	1219
Rfc2	19718	5	134581141	134601717	6	0	9	22	0	0	0.114372491	0.131017621	2601	1223
Lat2	56743	5	134600350	134615132	1	1	17	25	1	0	0.129252682	0.131017621	2952	1223
Eif4h	22384	5	134619745	134641198	5	0	2	34	3	0	0.129458756	0.131017621	2957.5	1223
Tmem270	76629	5	134902244	134908644	0	0	2	7	0	0	0.115118377	0.131017621	2619	1223
Cldn13	57255	5	134914611	134915933	0	0	5	3	10	0	0.128908641	0.131017621	2946	1223
Abhd11	68758	5	135009469	135009469	0	1	1	1	0	0	0.131017621	0.131017621	3002.5	1223
Pom121	107939	5	135378794	135378794	0	0	0	1	0	0	0.131017621	0.131017621	3002.5	1223
Zfp933	242747	4	147822998	147850355	39	1	27	253	6	0	0.068146758	0.131167139	1695	1227
2510039O18Rik	77034	4	147939117	147947231	1	0	16	36	7	0	0.097395283	0.131305457	2270	1228
Ubb	22187	11	62549187	62552979	0	1	5	0	2	0	0.101223378	0.131586165	2337.5	1230
Snord49b	100217426	11	62601429	62601429	0	0	1	0	0	0	0.131586165	0.131586165	3019.5	1230
2410006H16Rik	69221	11	62601429	62601429	0	0	1	0	0	0	0.131586165	0.131586165	3019.5	1230
Mir187	387182	18	24429725	24429725	0	0	1	0	0	0	0.132215877	0.132215877	3034	1232
Lrrtm1	74342	6	77240907	77257621	7	0	19	78	2	0	0.068362052	0.132441924	1706	1233.5
6330415B21Rik	70753	6	77382617	77384431	0	0	14	0	0	0	0.126224069	0.132441924	2897	1233.5
4933430N04Rik	71249	8	9126062	9134122	0	0	3	10	0	1	0.11607599	0.132776379	2652	1235
Pnldc1	240023	17	12889065	12911817	0	0	22	54	1	0	0.04158982	0.133143531	1094	1236
Wfdc1	67866	8	119672302	119672302	0	0	0	1	0	0	0.133343997	0.133343997	3054	1237
Rubcn	100502698	16	32822010	32879006	18	0	56	148	10	1	0.001626612	0.133460033	171	1238
Plod1	18822	4	147909765	147938682	3	0	85	258	6	0	0.085216522	0.133462999	2068	1239
Utp23	78581	15	51875907	51884583	11	0	6	13	1	0	0.108354207	0.133586463	2472	1240
Khdrbs3	13992	15	68929677	69099632	0	0	1	295	0	0	0.055808508	0.133598595	1430	1241
Mir6918	102466764	11	4889389	4891526	0	0	14	0	0	0	0.11236555	0.133622296	2554	1242
Mir6919	102466765	11	50230884	50231856	0	0	4	0	0	0	0.121135572	0.133704434	2764	1243
Clip2	269713	5	134489449	134553508	11	4	15	534	11	1	0.112688758	0.133852333	2565	1244
Gm11992	626870	11	9048223	9069221	6	0	1	34	1	0	0.048478786	0.134004757	1262	1245
Erc2	238988	14	27640471	28470409	1	0	1	62	0	0	0.104496505	0.134049765	2398	1246
Begain	380785	12	109032229	109070091	2	0	44	145	5	0	0.104373108	0.134349601	2395	1248
Ttc28	209683	5	110882125	111289354	8	0	4	1289	35	0	0.037033212	0.134349601	984	1248
Pitpnb	56305	5	111328804	111386640	1	0	46	257	2	0	0.073515295	0.134349601	1821	1248
Itgb2l	16415	16	96424510	96441755	0	0	0	4	2	1	0.133542101	0.134533607	3060.5	1250
Acsl5	433256	19	55251701	55287349	0	1	12	47	0	0	0.117087884	0.134654167	2671.5	1251.5
Zdhhc6	66980	19	55272211	55314165	7	0	1	29	0	0	0.117087884	0.134654167	2671.5	1251.5
Slc22a3	20519	17	12419440	12509023	7	0	3	166	1	0	0.056743892	0.134661942	1455	1253.5
Igf2r	16004	17	12685344	12771369	0	0	19	136	3	0	0.056743892	0.134661942	1455	1253.5
Thra	21833	11	98739581	98768600	1	0	6	36	1	0	0.115725587	0.13471439	2643	1258.5
Nr1d1	217166	11	98768600	98777050	0	1	7	6	1	0	0.114658039	0.13471439	2608	1258.5
Msl1	74026	11	98794459	98805187	0	0	22	22	1	0	0.084078505	0.13471439	2051	1258.5
Gm12359	100037262	11	98797878	98811799	0	0	4	24	0	0	0.084078505	0.13471439	2051	1258.5
Casc3	192160	11	98802990	98831482	0	1	16	58	1	0	0.084078505	0.13471439	2051	1258.5
Rapgefl1	268480	11	98835090	98853205	5	1	12	15	0	0	0.115518438	0.13471439	2634	1258.5
Wipf2	68524	11	98861680	98904168	1	0	20	46	0	0	0.093596515	0.13471439	2217	1258.5
Cdc6	23834	11	98911490	98920185	2	0	6	19	1	0	0.121040198	0.13471439	2762	1258.5
Mtfr1	67472	3	19198863	19198863	0	0	0	1	0	0	0.134748363	0.134748363	3103	1263
Lmln	239833	16	33060535	33126395	16	0	27	185	2	0	0.001427095	0.134755781	163.5	1264
Fyttd1	69823	16	32875842	32906245	1	2	17	40	2	0	0.002540191	0.134981676	205	1265
Mocos	68591	18	24676883	24699272	0	0	0	4	0	0	0.115499636	0.135005885	2633	1266
4930453L07Rik	74688	8	9143414	9148711	0	0	4	8	0	0	0.098003019	0.135083717	2281	1267
Muc4	140474	16	32734394	32782358	5	0	102	332	78	0	0.00142933	0.135207571	165	1268.5
Muc20	224116	16	32777438	32799423	50	1	30	242	22	0	0.001662687	0.135207571	175	1268.5
Hus1	15574	11	8996416	9012148	2	0	6	11	1	0	0.103293816	0.135279359	2381	1270.5
Sun3	194974	11	9016691	9048223	0	0	2	187	1	0	0.063069035	0.135279359	1591	1270.5
Mpc1	55951	17	8281633	8297164	1	4	24	45	1	0	0.118855279	0.135348352	2720	1272
Tanc2	77097	11	105613946	105924922	1	0	0	203	2	0	0.083492683	0.135348352	2035	1273
Sft2d1	106489	17	8309532	8327374	2	3	42	80	0	0	0.117251207	0.135351468	2674.5	1274
Cdip1	66626	16	4763254	4763254	0	0	0	1	0	0	0.135436351	0.135436351	3118.5	1275
Cdh26	381409	2	178428837	178482963	0	0	11	97	2	0	0.106555218	0.135449551	2442	1276
Syne2	319565	12	75836632	76109942	5	2	145	831	25	1	0.116130039	0.135457639	2653	1277
Plekhg3	263406	12	76530636	76578931	2	1	22	141	3	0	0.135537226	0.135570174	3122	1279
Mir5135	100628604	12	76534282	76534282	0	0	1	0	0	0	0.135570174	0.135570174	3123.5	1279
AI463170	100504549	12	76547157	76549708	0	0	22	6	0	0	0.135570174	0.135570174	3123.5	1279
Gm13212	433801	4	145584055	145621814	0	0	3	32	0	0	0.102789969	0.135577977	2371	1281
Olfr1387	258465	11	49459912	49459912	0	0	0	0	1	0	0.135590367	0.135590367	3125	1282
U2af2	22185	7	5069850	5079434	2	0	0	1	0	0	0.076286488	0.135817416	1883.5	1283
4930506C21Rik	75060	17	8294671	8312549	0	0	14	43	0	0	0.117251207	0.135875147	2674.5	1284
Mcm9	71567	10	53613409	53613409	0	0	1	1	0	0	0.135941345	0.135941345	3137	1285
Mki67	17345	7	135693082	135693082	0	0	0	0	1	0	0.136190372	0.136190372	3145	1286
Slc22a1	20517	17	12649250	12677214	2	0	9	47	2	0	0.094340519	0.136440928	2233	1287
Mfge8	17304	7	79134208	79150948	3	1	29	49	1	0	0.118529862	0.136442242	2701	1290
Abhd2	54608	7	79272036	79363581	7	1	2	190	0	1	0.117902852	0.136442242	2688	1290
Rlbp1	19771	7	79374899	79384526	3	0	1	20	0	0	0.136442242	0.136442242	3155	1290
Fanci	208836	7	79398497	79446917	0	0	3	10	0	0	0.119048234	0.136442242	2724.5	1290
Polg	18975	7	79446917	79463388	1	0	4	6	0	0	0.136442242	0.136442242	3155	1290
Dcc	13176	18	71254226	72352575	32	2	10	12538	24	0	0.03024893	0.136623407	780	1293.5
Ntm	235106	9	28995919	29951759	4	0	28	3668	2	0	0.017084772	0.136623407	533	1293.5
Miip	28010	4	147860963	147870174	2	6	45	46	9	0	0.101225785	0.136849952	2339	1295
Mrgprh	80978	17	12874326	12876269	0	1	8	0	0	0	0.133143531	0.136906355	3050	1296
Gm16287	100038595	4	139176785	139182612	0	0	22	37	0	0	0.059706644	0.136991102	1514	1297
Zfp946	74149	17	22422781	22455564	0	0	1	7	1	0	0.106769275	0.137020052	2447	1298
Dbx2	223843	15	95623663	95656958	12	2	35	164	5	0	0.078012722	0.137020052	1928	1299
Has1	15116	17	17843924	17857027	0	1	14	35	8	0	0.000353606	0.137150888	111	1316
Vmn2r96	433070	17	18571219	18616001	30	9	61	321	7	0	0.000198066	0.137150888	56	1316
Vmn2r97	627367	17	18912472	18958017	76	0	12	264	10	0	0.000198066	0.137150888	56	1316
Vmn2r98	224552	17	19051550	19082393	12	0	20	195	9	1	0.000166273	0.137150888	49	1316
Vmn2r103	627636	17	19771566	19812382	0	0	15	237	14	0	0.000221553	0.137150888	64	1316
Vmn2r104	22313	17	20028512	20050244	6	0	23	82	5	0	0.000228438	0.137150888	66	1316
Vmn2r105	627743	17	20202386	20236765	74	0	6	101	3	0	0.000316071	0.137150888	94	1316
Vmn2r106	224576	17	20266905	20287523	9	0	14	186	17	0	0.000353606	0.137150888	111	1316
Vmn1r233	171236	17	20991715	20998436	8	4	3	0	0	0	0.000359899	0.137150888	121	1316
Vmn1r237	171234	17	21313169	21313169	0	0	1	0	0	0	0.137150888	0.137150888	3182	1316
Zfp677	210503	17	21381834	21399227	1	3	22	15	4	0	0.115954738	0.137150888	2646	1316
Zfp54	22712	17	21425866	21435295	1	0	0	7	1	0	0.114535687	0.137150888	2606	1316
Zfp53	24132	17	21488394	21509653	0	0	6	23	2	0	0.000353606	0.137150888	111	1316
9330136K24Rik	319870	17	21530743	21537551	0	0	11	12	0	0	0.0004493	0.137150888	129.5	1316
Zfp52	22710	17	21533661	21562580	13	2	11	96	23	0	0.0004493	0.137150888	129.5	1316
Zfp948	381066	17	21565095	21588525	0	3	26	98	6	0	0.000304225	0.137150888	89	1316
Zfp760	240034	17	21706128	21725355	2	0	10	62	3	0	0.115954738	0.137150888	2646	1316
Zfp229	381067	17	21729602	21768606	3	1	4	26	0	0	0.000353606	0.137150888	111	1316
Zfp820	75424	17	21817710	21847728	2	0	3	44	2	0	0.070077026	0.137150888	1746	1316
Zfp995	70081	17	21880851	21911128	0	4	12	25	1	0	0.000353606	0.137150888	111	1316
Zfp942	73233	17	21927261	21964093	4	0	21	79	1	0	0.000274167	0.137150888	81.5	1316
Zfp943	74670	17	21961161	22071019	8	7	9	332	1	0	0.000353606	0.137150888	111	1316
Zfp947	210853	17	22144906	22168172	2	2	10	82	1	0	0.000353606	0.137150888	111	1316
Gm7072	631624	17	22286030	22316786	5	0	20	116	10	0	0.000304225	0.137150888	89	1316
Zfp944	319615	17	22338020	22362697	5	1	3	63	3	0	0.000353606	0.137150888	111	1316
Vmn2r111	210876	17	22545993	22575392	6	0	2	63	3	0	0.000353606	0.137150888	111	1316
Vmn2r112	628185	17	22599958	22620467	4	0	2	31	5	0	0.000353606	0.137150888	111	1316
Zfp945	240041	17	22846758	22868085	26	0	6	43	24	0	0.115562851	0.137150888	2636	1316
Vmn2r113	434701	17	22941499	22964873	9	0	1	17	0	0	0.115339937	0.137150888	2623	1316
Zfp40	22700	17	23173881	23195094	2	3	24	29	1	0	0.095772583	0.137150888	2251	1316
Vmn2r116	619697	17	23382637	23401052	6	1	8	8	7	0	0.115954738	0.137150888	2646	1316
Vmn2r117	619788	17	23455703	23479079	9	0	0	17	1	0	0.001103225	0.137150888	154	1316
6330415G19Rik	320020	17	23552723	23563749	0	0	0	33	0	0	0.000460992	0.137150888	131.5	1316
Aff1	17355	5	103691561	103854548	8	0	11	351	3	0	0.024277794	0.137359951	648.5	1333.5
Hsd17b13	243168	5	103955463	103978510	1	1	5	55	5	0	0.011212091	0.137359951	420	1333.5
Slc37a2	56857	9	37227794	37257170	10	1	21	103	5	0	0.111715754	0.137375701	2546	1338
Ccdc15	245902	9	37278265	37350297	2	2	19	76	2	0	0.11495423	0.137375701	2615	1338
Hepacam	72927	9	37365402	37386163	5	1	35	122	0	0	0.097190092	0.137375701	2268	1338
Olfr160	80706	9	37711428	37713930	0	0	12	0	2	0	0.075142686	0.137375701	1854	1338
Olfr878	258794	9	37916655	37918746	0	1	32	0	0	0	0.121359195	0.137375701	2770	1338
Olfr885	257885	9	38059452	38062194	0	0	17	0	18	0	0.114900631	0.137375701	2613	1338
Olfr887	258415	9	38082556	38085676	0	1	30	0	1	0	0.105023408	0.137375701	2410	1338
Fpr-rs6	321020	17	20182106	20185067	0	0	43	0	13	0	0.074209886	0.13743219	1835	1342
Zfp51	22709	17	21448818	21463511	0	0	4	27	1	0	0.093017276	0.1374862	2206	1345
Zfp994	240038	17	22197538	22227615	29	1	32	206	11	0	0.000967912	0.1374862	151	1345
Vmn2r114	666002	17	23285473	23314510	46	0	18	109	10	0	0.075995494	0.1374862	1876	1345
Vmn2r115	638102	17	23341768	23362347	18	0	21	57	10	0	0.000299849	0.1374862	87	1345
Zfp213	449521	17	23556934	23565210	5	8	8	16	3	0	0.0005677	0.1374862	140	1345
Atad1	67979	19	32688911	32741591	0	3	13	223	0	0	0.065451609	0.137510045	1639	1348.5
Pten	19211	19	32755604	32825828	11	1	23	302	0	0	0.097748467	0.137510045	2277	1348.5
Slc30a7	66500	3	115942728	115970031	2	0	0	1	0	0	0.135916692	0.137728208	3136	1352
Cdc14a	229776	3	116298132	116401167	0	0	0	3	0	0	0.135497724	0.137728208	3121	1352
Rtca	66368	3	116497673	116506005	1	0	1	2	1	0	0.137728208	0.137728208	3221	1352
Frrs1	20321	3	116880527	116887775	0	0	0	3	0	0	0.137728208	0.137728208	3221	1352
Palmd	114301	3	116930503	116934955	0	0	0	6	0	0	0.137728208	0.137728208	3221	1352
Snhg11	319317	2	158373740	158386090	81	3	15	85	3	1	0.121257459	0.13784145	2765.5	1355
Mapre1	13589	2	153739351	153773215	32	0	11	69	0	0	0.021443698	0.137849279	608	1356.5
Efcab8	100504221	2	153778189	153844676	6	0	30	194	11	0	0.010257667	0.137849279	396	1356.5
Fcrlb	435653	1	170914776	170914776	0	0	1	0	0	0	0.137894312	0.137894312	3227	1358
Aspa	11484	11	73310494	73331144	0	5	11	13	1	0	0.079745333	0.137896334	1962	1360.5
Olfr1	258923	11	73394400	73401497	3	0	5	2	0	0	0.076248225	0.137896334	1881	1360.5
Olfr385	259025	11	73589427	73591421	0	0	10	0	2	0	0.122337275	0.137896334	2797.5	1360.5
Olfr139	259005	11	74046962	74047228	0	0	3	0	0	0	0.137896334	0.137896334	3230	1360.5
Bpifb2	66557	2	153873486	153894284	0	0	2	75	5	0	0.023691885	0.137935155	641	1363
Zfp616	327963	11	74069641	74087181	7	0	1	23	5	0	0.116643911	0.138072328	2666	1364
Eef2kmt	70511	16	5251038	5251038	0	0	0	1	0	0	0.138300259	0.138300259	3247.5	1365.5
Mtus2	77521	5	147955569	148179007	0	0	2	206	0	0	0.103351826	0.138300259	2382	1365.5
Olfr381	259024	11	73486088	73488666	0	0	11	0	3	0	0.118811577	0.138712341	2712	1367
Olfr54	18354	11	51025189	51025894	0	0	2	0	0	0	0.137550593	0.138739077	3212	1368
Btbd3	228662	2	138254834	138569654	10	5	16	464	3	0	0.092615201	0.138750052	2200	1369
Celrr	98452	1	121125888	121166172	0	0	0	5	0	0	0.057400551	0.138792294	1469	1370
Qk	19317	17	10202778	10321770	41	0	23	386	0	0	0.092848922	0.138818925	2205	1372.5
1700110C19Rik	76634	17	10322670	10328785	0	0	16	44	0	0	0.1138047	0.138818925	2583.5	1372.5
Pacrg	69310	17	10403658	10842279	0	1	29	2706	1	0	0.075328918	0.138818925	1861	1372.5
A230009B12Rik	319750	17	10454225	10491105	0	0	22	167	0	0	0.1138047	0.138818925	2583.5	1372.5
Zfp983	73229	17	21614273	21663223	1	2	6	48	0	0	0.080340206	0.138859925	1976	1375
Papolg	216578	11	23872541	23894170	0	0	0	2	0	0	0.124837497	0.138874728	2851	1376
Tbl2	27368	5	135164039	135164559	2	0	0	0	0	0	0.131017621	0.138982297	3002.5	1377
Olfr382	258435	11	73517060	73518540	0	0	7	0	1	0	0.118811577	0.139080848	2712	1378
Olfr1388	258459	11	49443062	49444775	0	0	2	0	3	0	0.138382914	0.139084685	3253	1383
Rasgef1c	74563	11	49900003	49980558	10	0	15	436	3	1	0.017380129	0.139084685	543	1383
Mrnip	68067	11	50172555	50199118	0	0	7	70	2	0	0.03359395	0.139084685	903	1383
Sqstm1	18412	11	50200290	50212390	2	0	18	16	0	0	0.047268646	0.139084685	1229	1383
Mgat4b	103534	11	50209276	50233353	0	0	18	51	1	0	0.035138797	0.139084685	933	1383
Maml1	103806	11	50263041	50292083	0	1	1	9	0	0	0.045297241	0.139084685	1179.5	1383
Canx	12330	11	50295894	50326627	1	1	7	53	1	0	0.051031759	0.139084685	1320	1383
Rbfox1	268859	16	5884863	7393627	0	1	26	2456	0	0	0.048552269	0.139084685	1265	1383
1700123O21Rik	68238	16	5973685	5998186	0	0	5	74	0	0	0.12110995	0.139084685	2763	1383
Camta2	216874	11	70674763	70674763	1	0	0	0	1	0	0.139186627	0.139186627	3283	1388
Vmn1r45	22297	6	89936775	89937952	0	0	0	3	0	0	0.134567543	0.139198129	3096	1389
Bdh2	69772	3	135297150	135303209	0	0	0	2	0	0	0.139232359	0.139232359	3284	1390.5
Slc9b2	97086	3	135309813	135312694	0	0	0	3	0	0	0.137475262	0.139232359	3204	1390.5
As3mt	57344	19	46716286	46740238	0	0	0	2	0	0	0.129964935	0.139297125	2971	1392
Olfr1386	257888	11	49470324	49470498	0	0	0	0	2	0	0.137357405	0.139325361	3194.5	1393
Gal3st2c	619597	1	93988611	94016719	8	4	10	12	7	0	0.137049265	0.139376196	3178	1394
Slc15a5	277898	6	137983600	138081871	10	0	123	955	8	0	0.115301448	0.139412403	2622	1395.5
Mgst1	56615	6	138138477	138156695	2	9	50	217	7	0	0.114960394	0.139412403	2616	1395.5
Olfr376	258924	11	73369250	73376389	1	0	3	2	0	0	0.135078336	0.139419739	3110	1397
Slc22a2	20518	17	12582183	12626882	1	0	2	61	2	0	0.049173508	0.139507598	1273	1398
Rex2	100043034	4	147022266	147058704	0	0	0	5	1	0	0.124984364	0.139521251	2859	1399
Fhod3	225288	18	24710801	25119685	0	0	0	1362	7	0	0.038186721	0.139644778	1020	1400
Lhpp	76429	7	132656602	132694518	0	0	0	6	0	0	0.139673373	0.139673373	3301.5	1401
Mn1	433938	5	111416076	111454509	0	1	5	36	9	0	0.069025932	0.139738966	1723	1402
Evi2	101488212	11	79514904	79531725	5	1	7	21	1	0	0.010084836	0.139765304	386.5	1403
Olfr913	258225	9	38590946	38596106	1	1	7	3	2	0	0.10731919	0.1398469	2456	1404
C030013G03Rik	77414	17	12478414	12478514	0	0	0	3	0	0	0.137874146	0.139920741	3226	1405
Zfp2	22678	11	50902284	50917513	0	0	1	2	0	0	0.138533081	0.139927562	3259	1407
Zfp354a	21408	11	51063198	51063198	0	0	0	1	0	0	0.139927562	0.139927562	3322.5	1407
9230009I02Rik	619293	11	51083095	51090753	0	0	39	80	0	0	0.118201908	0.139927562	2695	1407
Mttp	17777	3	138092863	138092863	0	0	0	1	0	0	0.140039873	0.140039873	3327	1409.5
Adh6a	69117	3	138313365	138313365	0	0	1	1	0	1	0.140039873	0.140039873	3327	1409.5
Parp9	80285	16	35956885	35956885	0	0	0	0	1	0	0.140137612	0.140137612	3333.5	1411
Cpvl	71287	6	53873378	53978359	1	0	0	309	3	0	0.070084834	0.140288207	1748	1412.5
4921529L05Rik	320178	6	53977597	53996271	0	0	4	3	0	0	0.130905195	0.140288207	2995	1412.5
Zfp984	100041677	4	147754431	147811324	2	1	32	432	11	0	0.044979139	0.140385712	1169	1414
Foxs1	14239	2	152933734	152933734	0	0	1	0	0	0	0.140390561	0.140390561	3351	1415
Iffo2	212632	4	139528726	139620129	30	7	56	944	6	0	0.070562329	0.14056455	1755	1416
Smarca5-ps	545700	4	145462626	145464415	0	0	12	0	0	0	0.067387972	0.140650554	1678	1417
Nfe2l2	18024	2	75676732	75706387	0	1	12	31	3	0	0.140674118	0.140674118	3358	1422
Agps	228061	2	75830287	75927710	6	1	38	268	2	0	0.020398835	0.140674118	585	1422
Ttc30b	72421	2	75936755	75940516	0	0	7	0	4	0	0.125746532	0.140674118	2883	1422
Ttc30a2	620631	2	75975873	75980030	4	0	10	0	5	0	0.140239559	0.140674118	3341	1422
Ttc30a1	78802	2	75978519	75983277	7	1	4	0	3	0	0.140239559	0.140674118	3341	1422
Pde11a	241489	2	75989576	76340747	10	2	33	992	1	0	0.094215111	0.140674118	2228	1422
Cyct	13067	2	76354404	76362443	0	1	23	36	0	0	0.140183603	0.140674118	3335	1422
Rbm45	241490	2	76368027	76383739	5	4	42	176	2	0	0.140239559	0.140674118	3341	1422
Osbpl6	99031	2	76405421	76527811	0	3	4	551	0	0	0.109194603	0.140674118	2491	1422
Sec11c	66286	18	65798591	65817443	0	0	63	121	1	0	0.093124943	0.140689395	2208	1427
Runx2	12393	17	44496257	44815935	28	7	25	3088	10	0	0.051814762	0.140716493	1345	1428
Olfm3	229759	3	114905655	115069843	0	0	0	10	0	0	0.14073444	0.14073444	3359	1429
Rab31	106572	17	65652551	65774702	1	1	6	236	0	0	0.074145832	0.140901184	1832	1430
P2rx5	94045	11	73158557	73172506	12	0	15	37	2	0	0.032525131	0.140943143	863	1440.5
Ctns	83429	11	73183617	73200858	10	3	45	160	15	0	0.031401753	0.140943143	832	1440.5
Spata22	380709	11	73327930	73355464	4	1	10	37	3	0	0.077494484	0.140943143	1913	1440.5
Olfr20	258925	11	73349020	73355464	1	2	8	1	3	0	0.122337275	0.140943143	2797.5	1440.5
Olfr75-ps1	258186	11	73406559	73410891	0	0	3	8	0	0	0.127978873	0.140943143	2938	1440.5
Olfr378	259026	11	73425103	73430418	0	0	5	4	1	0	0.13365698	0.140943143	3068	1440.5
Zfp735	76390	11	73687544	73713506	4	0	7	54	4	0	0.068277213	0.140943143	1699	1440.5
Olfr389	259011	11	73774914	73782696	5	10	15	24	9	0	0.074777646	0.140943143	1847	1440.5
Olfr391	258236	11	73798152	73805002	3	1	24	18	1	0	0.11558205	0.140943143	2637	1440.5
Olfr392	259008	11	73811744	73819006	45	10	35	38	24	0	0.120024809	0.140943143	2748	1440.5
Olfr395	259007	11	73906618	73909071	0	0	7	0	5	0	0.122337275	0.140943143	2797.5	1440.5
Olfr397	258343	11	73962758	73964488	0	0	4	0	0	0	0.115442757	0.140943143	2630.5	1440.5
Olfr399	259006	11	74053845	74056160	0	0	2	0	1	0	0.137896334	0.140943143	3230	1440.5
Olfr402	258703	11	74154339	74155848	0	0	3	0	2	0	0.140943143	0.140943143	3371.5	1440.5
Olfr43	258706	11	74206264	74209287	1	0	9	0	0	0	0.137896334	0.140943143	3230	1440.5
Olfr406	258181	11	74267440	74269907	0	1	10	0	4	0	0.137896334	0.140943143	3230	1440.5
Olfr59	18359	11	74281849	74290525	4	0	3	11	1	0	0.122337275	0.140943143	2797.5	1440.5
Olfr410	258702	11	74334687	74337076	0	0	5	0	2	0	0.137896334	0.140943143	3230	1440.5
Olfr411	258704	11	74346649	74349620	0	0	26	0	4	0	0.122337275	0.140943143	2797.5	1440.5
Olfr412	258153	11	74362833	74365053	0	0	4	0	1	0	0.130821774	0.140943143	2990.5	1440.5
Ppp4r1	70351	17	65780623	65839748	0	0	39	137	1	1	0.104703122	0.140991718	2404	1451
Ralbp1	19765	17	65848870	65887387	2	3	26	102	5	0	0.102755132	0.141082251	2369	1452.5
Twsg1	65960	17	65923243	65950641	4	0	0	18	0	0	0.104852348	0.141082251	2406	1452.5
Zfp980	100041379	4	145669596	145702574	0	0	2	18	1	0	0.049875988	0.141100143	1295	1454
Olfr401	258701	11	74119519	74121936	0	0	4	0	2	0	0.136481538	0.141109554	3157	1455
T2	21331	17	8309532	8421030	0	0	26	296	4	0	0.116527167	0.141139952	2662.5	1456
Olfr394	259009	11	73888706	73888706	0	0	1	0	0	0	0.141275964	0.141275964	3389	1457
Thoc5	107829	11	4893747	4928696	0	1	18	87	3	0	0.057488873	0.141276071	1471	1458
Olfr722	258487	14	49894507	49903796	3	1	12	22	1	0	0.005054905	0.141285302	274	1469
Olfr725	258314	14	50034406	50037479	2	3	52	0	24	0	0.004823095	0.141285302	269	1469
Olfr732	258659	14	50281751	50284063	0	0	6	0	5	0	0.139454843	0.141285302	3293.5	1469
Olfr733	258657	14	50298719	50300872	0	0	6	0	3	0	0.138142246	0.141285302	3238.5	1469
Olfr734	258658	14	50320180	50322866	0	0	4	0	1	0	0.138142246	0.141285302	3238.5	1469
Olfr735	257909	14	50346594	50348369	0	0	25	0	0	0	0.138142246	0.141285302	3238.5	1469
Tlr11	239081	14	50355971	50363472	1	3	32	26	9	0	0.004126132	0.141285302	256	1469
Olfr736	258660	14	50390980	50393084	0	0	28	0	1	0	0.124705275	0.141285302	2847	1469
Olfr738	258662	14	50411697	50413619	0	0	15	0	2	0	0.138142246	0.141285302	3238.5	1469
Olfr739	258663	14	50422917	50424157	0	0	12	0	0	0	0.005901984	0.141285302	292	1469
Olfr741	258233	14	50472472	50487779	3	2	1	37	1	0	0.133334789	0.141285302	3053	1469
4930413M19Rik	73889	14	50501648	50517006	8	1	9	24	1	0	0.132748374	0.141285302	3041	1469
Olfr742	258422	14	50513482	50515322	0	0	4	0	1	0	0.136805305	0.141285302	3166	1469
Olfr743	219019	14	50532651	50533664	0	0	2	0	2	0	0.141285302	0.141285302	3391.5	1469
Olfr745	258296	14	50640492	50642215	0	1	7	0	0	0	0.139454843	0.141285302	3293.5	1469
Ttc5	219022	14	50765452	50782586	1	0	3	7	0	0	0.137510045	0.141285302	3205.5	1469
Ccnb1ip1	239083	14	50792045	50808168	0	3	6	25	1	0	0.082825147	0.141285302	2018	1469
Parp2	11546	14	50806567	50820343	0	0	6	3	0	0	0.14029108	0.141285302	3346.5	1469
Ang2	11731	14	51195632	51197862	0	0	11	0	1	0	0.137510045	0.141285302	3205.5	1469
Ear4	53877	14	51201654	51203605	0	2	9	0	0	0	0.139454843	0.141285302	3293.5	1469
4930597G03Rik	75377	14	51317993	51346278	0	0	1	50	0	0	0.002288932	0.141285302	199.5	1469
Gm19466	100502945	18	53670153	53701438	0	0	0	3	0	0	0.112970403	0.141434107	2567.5	1480
Crybb1	12960	5	112257407	112269558	1	0	0	8	1	0	0.083478032	0.141554088	2033	1481.5
Gm6588	625464	5	112448123	112451486	5	0	4	0	3	0	0.110790315	0.141554088	2524	1481.5
Psma8	73677	18	14704199	14762043	10	0	14	182	3	0	0.092425322	0.141633081	2195	1483
Mir7-2	723884	7	78887150	78887150	0	0	1	0	0	0	0.141671744	0.141671744	3406.5	1485
Aen	68048	7	78894419	78910843	2	2	9	8	0	0	0.13469452	0.141671744	3099	1485
Isg20	57444	7	78913048	78919452	0	2	4	10	0	0	0.141671744	0.141671744	3406.5	1485
Gm19299	100502636	9	67132243	67187375	0	0	4	11	0	0	0.140261715	0.141767992	3344	1488.5
Tln2	70549	9	67217557	67561678	1	1	15	590	7	0	0.074913495	0.141767992	1848	1488.5
C2cd4a	244911	9	67830612	67834109	1	0	1	1	4	0	0.141415984	0.141767992	3399	1488.5
Vps13c	320528	9	67839067	67993701	47	0	17	559	13	0	0.100567203	0.141767992	2328	1488.5
Robo4	74144	9	37400015	37414717	8	0	1	4	1	0	0.133839658	0.141805893	3074.5	1491
Cbfa2t2	12396	2	154439191	154526265	1	0	3	27	0	0	0.109840349	0.141913862	2503	1492
Npas2	18143	1	39192953	39363038	2	1	4	505	5	0	0.022929287	0.142137126	631	1493
Sobp	109205	10	43025514	43169265	0	0	0	5	0	0	0.03410468	0.142188405	914.5	1494
Olfr380	259027	11	73453752	73455643	0	0	3	0	3	0	0.137071019	0.142344135	3179	1495
Olfr723	259147	14	49928625	49931506	0	0	22	0	3	0	0.007294233	0.142357129	320	1496
Olfr744	257884	14	50616486	50617939	0	0	2	0	0	0	0.139454843	0.142450349	3293.5	1497
Rps6ka2	20112	17	7168396	7303052	22	0	2	61	0	0	0.118849493	0.142712288	2716	1498.5
Ccr6	12458	17	8234200	8256696	0	3	27	70	1	0	0.118849493	0.142712288	2716	1498.5
Gm6961	629300	15	95747842	95752577	0	0	2	35	0	0	0.116499392	0.142717077	2661	1500
Gm17830	100415784	17	49306057	49312363	0	0	2	20	0	0	0.135740141	0.142737482	3132	1501
BB218582	102640562	2	106643166	106650847	0	0	12	12	0	0	0.142775414	0.142775414	3449.5	1504.5
Mpped2	77015	2	106691675	106853598	0	0	2	411	0	0	0.050187546	0.142775414	1303	1504.5
Arl14ep	212772	2	106963003	106973880	4	0	6	15	0	0	0.141192791	0.142775414	3387	1504.5
Fshb	14308	2	107057794	107059133	0	0	0	2	0	0	0.142775414	0.142775414	3449.5	1504.5
Pter	19212	2	12922477	13003136	10	0	9	204	2	0	0.107689758	0.142775414	2459.5	1504.5
C1ql3	227580	2	13004816	13013165	0	1	5	13	1	0	0.107689758	0.142775414	2459.5	1504.5
Igsf5	72058	16	96359940	96484965	1	0	1	9	0	0	0.133542101	0.142988297	3060.5	1508
Tenm2	23964	11	36010025	37230242	0	5	11	1577	4	0	0.103835483	0.142991328	2388	1509
Cryba4	12959	5	112252317	112252317	0	0	1	1	0	0	0.14301482	0.14301482	3467	1512.5
Tpst2	22022	5	112274732	112314864	0	0	10	54	1	0	0.075132394	0.14301482	1853	1512.5
Tfip11	54723	5	112324369	112337761	1	2	7	47	6	0	0.074264178	0.14301482	1836.5	1512.5
Srrd	70118	5	112337761	112344776	0	0	3	9	0	0	0.138390692	0.14301482	3254	1512.5
Sez6l	56747	5	112421196	112578793	2	0	49	673	8	0	0.03893818	0.14301482	1037	1512.5
1700034G24Rik	67325	5	112583456	112591945	0	0	2	13	0	0	0.074264178	0.14301482	1836.5	1512.5
Myh4	17884	11	67244850	67244850	0	0	0	1	0	0	0.14311277	0.14311277	3474	1516
Frmd4a	209630	2	4015779	4607204	1	7	74	1850	6	0	0.033139188	0.143153525	889	1517
Nppa	230899	4	147998854	148001955	1	1	14	1	0	0	0.118698961	0.14319514	2708	1518
Tshz3	243931	7	36702167	36724297	0	0	0	3	0	0	0.142988297	0.143284374	3464.5	1519
Olfr740	258661	14	50452131	50453185	0	0	3	0	1	0	0.141285302	0.143365578	3391.5	1520
Dscam	13508	16	96693937	97077931	0	0	0	7	0	0	0.000486606	0.143592164	135	1521
Olfr746	258295	14	50651358	50653182	0	0	5	0	0	0	0.092392296	0.143632481	2192	1522
Taf4	228980	2	179951288	179958856	0	0	0	3	0	0	0.044118842	0.143682125	1149	1523
Oaz2	18247	9	65670524	65670524	0	0	0	1	0	0	0.14383333	0.14383333	3495	1524
Hmgxb4	70823	8	74995847	75010475	0	0	0	5	0	0	0.143863024	0.143863024	3496.5	1526.5
Tom1	21968	8	75050063	75068749	0	0	1	14	0	0	0.143863024	0.143863024	3496.5	1526.5
Hmox1	15368	8	75091891	75099727	0	0	5	6	0	0	0.142737482	0.143863024	3445.5	1526.5
Mcm5	17218	8	75107578	75128036	2	1	37	29	3	0	0.056044746	0.143863024	1438	1526.5
Pantr2	66620	1	42709349	42709349	0	0	0	1	0	0	0.14408304	0.14408304	3510	1529
Gm3448	100041639	17	14975354	15022121	0	0	0	2	0	0	0.032614039	0.144278182	866.5	1530
Ccm2l	228788	2	153069460	153078627	0	0	0	4	0	0	0.140390561	0.144353742	3351	1531
Mgat4e	71001	1	134541066	134551606	4	6	27	21	4	0	0.11328695	0.14442456	2573	1532.5
Slc7a6os	66432	8	106202061	106210954	0	0	1	6	0	0	0.141343315	0.14442456	3397.5	1532.5
Fgf9	14180	14	58098391	58110951	1	0	0	1	0	0	0.144486521	0.144486521	3523.5	1534
Scamp4	56214	10	80607786	80607786	1	0	0	1	0	0	0.144662818	0.144662818	3533.5	1535.5
Mir6912	102465550	10	80607786	80607786	0	0	1	0	0	0	0.144662818	0.144662818	3533.5	1535.5
Gm12296	100093714	11	66167296	66272986	0	0	1	280	0	0	0.013562722	0.144703034	470	1537
Nppb	18158	4	147983908	147986988	1	0	8	8	3	0	0.108805356	0.144972879	2478	1538
Erh	13877	12	80634654	80645923	0	0	3	11	0	0	0.144973035	0.144973035	3547	1540.5
Slc39a9	328133	12	80643112	80682391	14	1	3	113	1	0	0.036551035	0.144973035	968	1540.5
Plekhd1os	68354	12	80688509	80692642	0	0	1	7	0	0	0.03878399	0.144973035	1032	1540.5
Plekhd1	217682	12	80692642	80719961	0	1	41	124	1	1	0.036551035	0.144973035	968	1540.5
Guk1	14923	11	59190832	59194142	0	0	8	1	0	0	0.141293316	0.145080772	3394.5	1544
Mrpl55	67212	11	59200677	59206011	1	8	38	26	2	0	0.126282572	0.145080772	2899	1544
2310033P09Rik	67862	11	59206519	59210726	2	1	11	5	0	0	0.123087935	0.145080772	2815.5	1544
2610507I01Rik	72203	11	59200394	59204182	0	0	32	10	0	1	0.126282572	0.14511266	2899	1546
Sptb	20741	12	76580606	76712420	12	1	14	429	15	0	0.098782969	0.14515033	2302	1549.5
Fntb	110606	12	76764008	76920850	3	0	20	522	1	0	0.001076981	0.14515033	153	1549.5
Churc1	211151	12	76764008	76783159	5	0	14	87	0	0	0.1213677	0.14515033	2771.5	1549.5
Rab15	104886	12	76800309	76824348	0	6	40	79	1	0	0.1213677	0.14515033	2771.5	1549.5
Max	17187	12	76937977	76963597	2	0	15	46	0	0	0.140468325	0.14515033	3353	1549.5
Fut8	53618	12	77239394	77473310	0	0	0	162	0	0	0.097774582	0.14515033	2278	1549.5
Olfr393	259010	11	73847923	73849491	0	0	6	0	4	0	0.118811577	0.145248839	2712	1553
Cbr4	234309	8	61486126	61506323	15	0	11	128	4	0	0.10803236	0.145255949	2467.5	1554
Pagr1a	67278	7	127002394	127020998	1	0	1	6	0	0	0.075816929	0.145475651	1868.5	1555
Akr7a5	110198	4	139308927	139318106	0	0	52	59	7	0	0.057834136	0.145529944	1473.5	1556
Mysm1	320713	4	94943593	94943593	1	0	0	0	0	0	0.145541467	0.145541467	3579	1557
Rbp3	19661	14	33952301	33958969	0	0	2	1	0	0	0.144967009	0.145617075	3546	1558
9930104L06Rik	194268	4	124941802	124941802	0	0	0	1	0	0	0.145639399	0.145639399	3582.5	1559
Rabif	98710	1	134498212	134507731	1	0	0	3	0	0	0.141979896	0.145680078	3421	1560
Olfr384	193053	11	73600873	73603256	0	0	14	0	2	0	0.122337275	0.145684886	2797.5	1561.5
Btbd7	238386	12	102783514	102872341	4	0	0	2	0	0	0.143745127	0.145684886	3491	1561.5
Upp1	22271	11	9123288	9123288	0	0	0	1	0	0	0.145700075	0.145700075	3586	1563
Foxb2	14240	19	16873659	16875599	0	2	5	0	0	0	0.1432066	0.145757714	3480	1564
Klhl1	93688	14	96104779	96520823	3	10	9	2476	14	0	0.00550188	0.145828631	284	1565
Scamp2	24044	9	57588592	57588592	1	0	0	0	0	0	0.145867075	0.145867075	3590.5	1566.5
Ulk3	71742	9	57588592	57588592	0	0	1	0	0	0	0.145867075	0.145867075	3590.5	1566.5
Pqlc2	212555	4	139294283	139312452	27	1	19	168	1	0	0.057834136	0.145873505	1473.5	1568
Capzb	12345	4	139191017	139290762	0	2	52	640	2	0	0.040999857	0.14594982	1085	1569
Gal3st2	381334	1	93860831	93874706	0	0	4	2	1	0	0.146062169	0.146062169	3602.5	1570
Ndfip2	76273	14	105257473	105308538	5	0	2	48	1	0	0.127121889	0.146067476	2921	1571
Rbm26	74213	14	105106985	105179117	5	1	18	95	1	0	0.109174502	0.146086232	2490	1572
Evi2a	14017	11	79527066	79531725	1	1	7	5	0	0	0.062325388	0.146254877	1579	1573
Tmem17	103765	11	22510095	22517402	0	1	5	8	1	0	0.091869045	0.146280712	2182	1574
Olfr23	18321	11	73938343	73940711	0	0	3	0	1	0	0.140943143	0.146425545	3371.5	1575
Havcr2	171285	11	46455232	46481032	4	0	0	150	7	0	0.096568114	0.146517184	2262	1576
Arf1	11840	11	59212049	59229954	2	0	10	35	1	0	0.126282572	0.146679393	2899	1577
Mamdc2	71738	19	23311187	23443552	1	0	0	204	3	0	0.122689751	0.146738834	2806	1578
Dpp6	13483	5	26850432	27726873	1	0	2	1503	19	0	0.046358204	0.146758569	1205	1580.5
Speer4b	73526	5	27495936	27503238	6	0	7	20	2	0	0.052585448	0.146758569	1360	1580.5
Paxip1	55982	5	27743081	27793630	0	2	23	53	3	0	0.074138238	0.146758569	1831	1580.5
Htr5a	15563	5	27840247	27853038	11	1	26	38	2	0	0.075021967	0.146758569	1849	1580.5
Gbe1	74185	16	70314474	70569434	21	0	26	560	2	0	0.118863046	0.14690264	2721	1583
Klhl12	240756	1	134461534	134489428	0	0	2	20	1	0	0.117552947	0.146935595	2680.5	1586.5
Slc7a6	330836	8	106167596	106198503	5	1	4	23	0	0	0.14442456	0.146935595	3519	1586.5
Prmt7	214572	8	106209613	106244278	0	1	2	2	0	0	0.143242264	0.146935595	3481.5	1586.5
Smpd3	58994	8	106278473	106336839	0	0	0	17	0	0	0.146935595	0.146935595	3630	1586.5
Zfp90	22751	8	106416494	106426522	14	0	0	90	10	0	0.117552947	0.146935595	2680.5	1586.5
Cdh3	12560	8	106508976	106523818	0	1	19	49	1	0	0.141343315	0.146935595	3397.5	1586.5
Hnrnpa3	229279	2	75657278	75666309	1	0	6	11	1	0	0.143178462	0.14709475	3478	1590
Adssl1	11565	12	112618072	112641289	3	1	57	235	3	0	0.105795447	0.147182347	2425	1591.5
Mir6939	102465566	12	112659243	112661342	0	0	15	0	0	0	0.142357129	0.147182347	3431.5	1591.5
Rgs5	19737	1	169653646	169695648	6	0	29	89	1	0	0.114341552	0.147256473	2599	1593.5
Rgs4	19736	1	169741979	169749464	2	1	29	9	2	0	0.125598159	0.147256473	2878	1593.5
4930435F18Rik	74680	13	116804485	116835696	0	0	0	17	0	0	0.061026173	0.147333006	1551.5	1595
Snx2	67804	18	53174886	53174886	0	0	1	0	0	0	0.147385557	0.147385557	3643	1596
Tubb4a	22153	17	57083567	57089774	0	0	14	13	0	0	0.14262478	0.147393419	3438	1598
Tnfsf14	50930	17	57192093	57192093	0	0	0	1	0	0	0.147393419	0.147393419	3646	1598
Trip10	106628	17	57254051	57260156	0	0	2	3	0	0	0.147393419	0.147393419	3646	1598
Qtrt2	106248	16	43868734	43925306	0	0	1	6	0	0	0.110072457	0.14741715	2508	1600
9330175E14Rik	320377	8	94434727	94437069	0	0	3	1	0	0	0.115233298	0.147463648	2621	1601
Hspa13	110920	16	75745497	75768627	38	4	23	95	8	0	0.103846141	0.147468855	2389	1602
Mir6388	102465205	12	115695602	115696811	0	0	55	0	0	0	0.140671764	0.14752237	3357	1603
A630023A22Rik	105518	14	34056999	34102238	0	0	0	20	0	0	0.140808576	0.147753688	3362.5	1605.5
Anxa8	11752	14	34086146	34098302	0	0	1	7	1	0	0.147753688	0.147753688	3660.5	1605.5
Fam25c	69134	14	34356579	34356579	0	0	1	0	0	0	0.147753688	0.147753688	3660.5	1605.5
Bmpr1a	12166	14	34418058	34505214	0	0	1	15	1	0	0.131234252	0.147753688	3011	1605.5
Manba	110173	3	135556579	135556579	0	0	0	1	0	0	0.147775734	0.147775734	3666	1608
Kdm5b	75605	1	134558355	134634640	7	1	13	121	2	0	0.085157862	0.147921568	2066	1609
Mir1192	100316672	19	23148505	23149412	0	0	4	0	0	0	0.148035038	0.148035038	3675	1610
Lsamp	268890	16	40022658	42166402	21	2	7	3377	0	0	0.000285607	0.148067067	85	1611
V1ra8	113850	6	90204290	90205433	2	0	0	0	0	0	0.136875923	0.148100762	3169	1612
Vmn2r88	669149	14	51409173	51420679	20	1	19	18	4	0	0.12128423	0.148146454	2767.5	1613
Caskin1	268932	17	24487558	24503796	0	0	1	6	0	0	0.131898	0.148170105	3028	1614
Ubr4	69116	4	139350673	139488663	0	1	71	352	12	1	0.064371677	0.14824658	1621	1615
Mylk2	228785	2	152919518	152921196	0	0	0	3	0	0	0.126291492	0.148316923	2901	1618
Dusp15	252864	2	152944361	152953216	1	0	1	7	1	0	0.134979096	0.148316923	3107	1618
Kif3b	16569	2	153296721	153327906	0	0	0	7	0	0	0.125612482	0.148316923	2879	1618
Commd7	99311	2	153617236	153633675	11	1	5	81	1	0	0.11130388	0.148316923	2533	1618
Dnmt3b	13436	2	153647701	153684670	0	1	10	27	0	0	0.129011937	0.148316923	2949	1618
Itk	16428	11	46327287	46386087	7	0	0	81	0	0	0.075663122	0.148634273	1866	1621
Fam204a	76539	19	60198726	60228632	3	0	3	23	1	0	0.137008895	0.148648817	3172.5	1622
Haus5	71909	7	30641687	30666493	1	0	47	145	7	0	0.025197521	0.14874429	674	1623
Olfr1415	258228	1	92491589	92491589	0	0	1	0	0	0	0.148755416	0.148755416	3693	1624
Zdhhc22	238331	12	86984390	86984390	0	0	0	1	0	0	0.148759504	0.148759504	3695	1625
Slc25a17	20524	15	81319006	81362569	8	1	43	165	1	0	0.001798456	0.148783863	180	1626
Olfr1384	258464	11	49513566	49514578	0	0	1	0	1	0	0.139084685	0.148880853	3275	1627
Mrps9	69527	1	42850947	42905130	0	0	9	46	1	0	0.120379986	0.149257561	2752	1628
Dnah9	237806	11	65839149	66170295	0	0	22	975	6	0	0.107254509	0.149294922	2454	1635.5
Shisa6	380702	11	66212873	66491161	2	0	0	102	1	0	0.130821774	0.149294922	2990.5	1635.5
Gm12298	100038666	11	66906478	66947621	0	0	1	114	0	0	0.125270459	0.149294922	2863	1635.5
Pirt	193003	11	66911350	66929475	2	0	1	5	0	0	0.141078428	0.149294922	3377	1635.5
Tmem238l	71576	11	66956310	66964631	1	0	5	14	1	0	0.137012316	0.149294922	3174	1635.5
Tmem220	338369	11	67024954	67034742	6	0	3	61	1	0	0.130821774	0.149294922	2990.5	1635.5
Adprm	66358	11	67037992	67053922	1	1	23	150	1	0	0.12184982	0.149294922	2779	1635.5
Sco1	52892	11	67050685	67064088	1	0	28	13	0	0	0.127586888	0.149294922	2931	1635.5
Myh3	17883	11	67076302	67102251	2	0	4	94	22	0	0.130821774	0.149294922	2990.5	1635.5
Mir6923	102466766	11	67097830	67099914	0	0	43	0	0	0	0.130821774	0.149294922	2990.5	1635.5
2310065F04Rik	74184	11	67114507	67121706	0	0	11	20	0	0	0.130821774	0.149294922	2990.5	1635.5
Myh2	17882	11	67169173	67197491	1	0	1	52	15	0	0.118529461	0.149294922	2700	1635.5
Myh1	17879	11	67199368	67215713	0	1	3	62	9	1	0.115626132	0.149294922	2640	1635.5
Myhas	102633540	11	67212580	67215713	0	0	0	20	0	0	0.135871405	0.149294922	3135	1635.5
Gdf10	14560	14	33922844	33936757	2	0	1	3	0	0	0.147753688	0.149312297	3660.5	1644
Antxrl	239029	14	34056999	34069768	0	0	0	8	0	0	0.140808576	0.149312297	3362.5	1644
9230112D13Rik	78243	14	34511833	34518729	1	0	0	1	0	0	0.147753688	0.149312297	3660.5	1644
Arhgap33os	100504207	7	30513202	30521981	0	0	22	33	8	1	0.025197521	0.149339125	674	1646
Tmem132d	243274	5	127781724	128419723	8	0	18	923	3	0	0.065913201	0.149345025	1646	1647
Ap1b1	11764	11	4984962	5042515	2	0	42	132	4	0	0.113985504	0.149390686	2587	1649
Ewsr1	14030	11	5070157	5097341	1	0	14	50	2	0	0.12661731	0.149390686	2910.5	1649
Kremen1	84035	11	5192290	5263518	14	0	9	87	1	0	0.088292622	0.149390686	2111	1649
Selp	20344	1	164132396	164145315	0	0	2	4	0	0	0.106043209	0.149495045	2430	1651
Olfr1241	258447	2	89482738	89484721	0	0	5	0	2	0	0.145475651	0.149856911	3572	1653
Olfr1242	258970	2	89493323	89496287	1	1	51	0	4	0	0.143173402	0.149856911	3476.5	1653
Olfr1247	258968	2	89609216	89611894	0	0	26	0	4	0	0.145475651	0.149856911	3572	1653
Gas2l1	78926	11	5055719	5067129	3	0	6	10	0	0	0.109522017	0.149870738	2499	1655
Wnt3a	22416	11	59248240	59292645	17	1	11	384	5	0	0.123087935	0.149885755	2815.5	1656
Vmn1r184	100312477	7	26267439	26267439	0	0	0	0	1	0	0.149965368	0.149965368	3755	1657
Bricd5	319259	17	24474964	24474964	0	0	0	1	0	0	0.150098862	0.150098862	3756	1658.5
Mlst8	56716	17	24474964	24479891	1	0	2	0	0	0	0.126448533	0.150098862	2908	1658.5
Cyp2b9	13094	7	26171730	26198814	0	0	1	3	0	0	0.147709092	0.150132409	3655	1660
Acat2	110460	17	12944050	12962433	0	0	13	32	1	0	0.041921892	0.150211289	1103	1661
Edn2	13615	4	120159235	120166308	0	0	9	9	0	0	0.122365029	0.150362123	2803	1662
Prss30	30943	17	23972141	23982185	3	1	24	21	8	0	0.141180606	0.150369283	3382	1663
Spock3	72902	8	62952917	63357017	14	0	0	163	0	0	0.104703122	0.150418837	2403	1664
Gm1604b	381059	17	7035190	8096309	0	0	0	17	0	0	0.133528979	0.15055983	3059	1665
Glud1	14661	14	34324589	34334428	0	0	1	3	0	0	0.150526871	0.150698889	3770	1666
Ibsp	15891	5	104298791	104311444	4	0	1	59	3	0	0.03147532	0.150712304	834.5	1668
Mepe	94111	5	104323361	104338508	4	1	77	234	36	0	0.012444322	0.150712304	454	1668
Lrrc8b	433926	5	105414032	105490068	12	0	3	137	4	0	0.014880624	0.150712304	501	1668
Eif4g2	13690	7	111076510	111076510	0	0	1	1	0	0	0.150766759	0.150766759	3775	1670
Slc5a3	53881	16	92058332	92086068	11	2	2	8	0	0	0.117942437	0.150783428	2689	1671
Gdf2	12165	14	33941504	33946351	1	0	0	4	0	0	0.147753688	0.150870906	3660.5	1676
Gm5460	432838	14	34017370	34044364	0	0	0	12	1	0	0.131320686	0.150870906	3016	1676
Gprin2	432839	14	34190822	34190822	1	0	0	0	0	0	0.150870906	0.150870906	3779	1676
Syt15	319508	14	34220945	34230275	3	0	0	6	1	0	0.14567748	0.150870906	3584	1676
Shld2	75698	14	34238159	34293396	0	0	2	24	0	0	0.144239389	0.150870906	3512	1676
Ldb3	24131	14	34528556	34589641	1	0	2	41	1	0	0.131148606	0.150870906	3008	1676
Opn4	30044	14	34592727	34592727	1	0	1	1	0	0	0.150870906	0.150870906	3779	1676
Grid1	14803	14	34826460	35577529	0	0	0	327	0	0	0.127617007	0.150870906	2933	1676
4930596D02Rik	239036	14	35812748	35812748	0	0	1	0	0	0	0.150870906	0.150870906	3779	1676
Rasl10a	75668	11	5056179	5059282	0	0	5	3	0	0	0.144359783	0.150899662	3516	1681
Npy4r	19065	14	34144508	34154155	1	0	3	4	0	0	0.150870906	0.150909518	3779	1682
Nipsnap1	18082	11	4871982	4894120	5	0	41	120	2	0	0.104971451	0.150955126	2408	1683
Pja2	224938	17	64298420	64332646	0	1	4	9	1	0	0.149835582	0.151034583	3730	1684
Adra2c	11553	5	35276762	35281573	2	1	4	0	1	0	0.148885092	0.151302855	3700	1685.5
4930478P22Rik	74429	5	35359618	35366400	0	0	25	54	0	0	0.123873548	0.151302855	2832	1685.5
4930503F20Rik	218902	14	33810517	33811275	0	0	1	1	0	0	0.150870906	0.151653516	3779	1687.5
Wapl	218914	14	34672472	34735227	0	0	1	9	0	0	0.147753688	0.151653516	3660.5	1687.5
C3	12266	17	57205100	57220935	0	0	1	5	0	0	0.147393419	0.152062937	3646	1689.5
Gpr108	78308	17	57236975	57241368	0	0	0	1	1	0	0.147393419	0.152062937	3646	1689.5
Gm32921	102635633	5	106320976	106320976	0	0	1	0	0	0	0.152150486	0.152150486	3804	1691
Nckap5	210356	1	125964452	126751565	0	0	0	145	0	0	0.038222184	0.152341614	1021	1692
Smarce1	57376	11	99210950	99231524	0	0	1	1	0	0	0.14969727	0.152370121	3724.5	1693
Vmn2r120	224916	17	57513749	57542044	0	0	0	5	0	0	0.152490991	0.152490991	3812	1694
Tnfsf9	21950	17	57103633	57106511	0	0	10	3	2	0	0.140039873	0.152517244	3327	1695
Prrt2	69017	7	127020998	127020998	0	0	1	1	0	0	0.1526606	0.1526606	3821	1696
Mir193a	387188	11	79710007	79711926	0	0	3	0	0	0	0.15274445	0.15274445	3824	1697
Drd3	13490	16	43803243	43820555	0	0	0	10	1	0	0.110072457	0.152868768	2508	1698.5
Lrrc27	76612	7	139211075	139242939	3	4	97	231	12	1	0.051917414	0.152868768	1349	1698.5
Inf2	70435	12	112586920	112615507	5	4	44	318	13	0	0.119966683	0.152873971	2747	1700.5
Siva1	30954	12	112642727	112648195	0	5	43	20	3	0	0.124988021	0.152873971	2860	1700.5
Otx1	18423	11	21995819	22004648	2	0	9	12	1	0	0.132004574	0.152911958	3030	1705.5
Ehbp1	216565	11	22007394	22343456	0	0	13	1003	3	0	0.0824336	0.152911958	2015	1705.5
B3gnt2	53625	11	22760202	22974882	2	2	7	477	3	0	0.06691662	0.152911958	1664	1705.5
Commd1	17846	11	22896756	22984287	4	0	2	75	1	0	0.074628691	0.152911958	1843	1705.5
Zrsr1	22183	11	22970395	22974882	1	1	2	0	0	0	0.146280712	0.152911958	3614	1705.5
Cct4	12464	11	22988911	23002985	1	2	17	17	2	0	0.137607158	0.152911958	3214.5	1705.5
Usp34	17847	11	23333951	23453239	0	0	2	7	0	0	0.03480671	0.152911958	925	1705.5
Bcl11a	14025	11	24076327	24157514	0	0	3	99	0	0	0.109866261	0.152911958	2505	1705.5
Rasgrp3	240168	17	75450019	75526840	0	1	10	295	1	0	0.113106578	0.153065317	2570	1710
Fgfr1op	75296	17	8170630	8191645	0	0	2	8	0	0	0.134453586	0.153103237	3092	1711
Ms4a19	69416	19	11141381	11166670	0	1	7	101	1	0	0.126032088	0.15313427	2890	1713.5
Ms4a13	73466	19	11170288	11197628	0	2	6	93	0	0	0.143202624	0.15313427	3479	1713.5
4930526L06Rik	75138	19	11194864	11298345	0	0	10	293	0	0	0.068446969	0.15313427	1710.5	1713.5
Ms4a1	12482	19	11249902	11268142	11	0	12	47	1	0	0.068446969	0.15313427	1710.5	1713.5
Ptpre	19267	7	135601719	135630765	0	0	0	2	0	0	0.153455537	0.153455537	3850	1716
Tac1	21333	6	7553036	7562978	5	5	17	31	0	0	0.126652451	0.153687852	2913	1718
Asns	27053	6	7675703	7679323	0	0	4	18	2	0	0.130972838	0.153687852	2999	1718
C1galt1	94192	6	7858759	7875421	11	0	0	23	0	0	0.130663666	0.153687852	2986	1718
Ppy	19064	11	102100715	102102803	0	1	8	1	0	0	0.132300386	0.153816667	3036	1720
Abca3	27410	17	24350178	24408493	0	0	2	40	5	0	0.126719904	0.153837047	2915	1721
Mpp3	13384	11	101999808	102030160	12	3	24	119	4	0	0.085893731	0.153860331	2075	1723.5
Cd300lg	52685	11	102040597	102055462	4	0	1	36	5	0	0.120093119	0.153860331	2749	1723.5
Mpp2	50997	11	102058202	102087642	10	2	6	33	1	0	0.131402206	0.153860331	3017	1723.5
Pyy	217212	11	102107176	102109689	0	0	6	0	1	0	0.134040257	0.153860331	3082	1723.5
Tbl1xr1	81004	3	22091766	22182732	0	0	0	4	0	0	0.148300107	0.154047047	3681	1726
Ccn3	18133	15	54744092	54753945	8	1	11	38	4	0	0.137008895	0.154073108	3172.5	1727.5
P3h2	210530	16	25970064	25970064	0	0	0	1	0	0	0.154073108	0.154073108	3874	1727.5
Asxl1	228790	2	153359264	153402325	1	0	0	7	0	0	0.110505948	0.154209758	2516	1729
Mef2c	17260	13	83510841	83626558	0	0	1	17	0	0	0.122328837	0.15428796	2793	1730
Serpina4-ps1	321018	12	104084907	104084907	0	0	0	1	0	0	0.154318664	0.154318664	3884	1735.5
Serpina3a	74069	12	104111684	104121742	2	2	10	36	5	0	0.13606952	0.154318664	3142	1735.5
Serpina3b	271047	12	104126156	104138815	0	0	15	17	1	0	0.128099651	0.154318664	2940	1735.5
Serpina3c	16625	12	104150810	104152889	0	0	0	4	0	0	0.154318664	0.154318664	3884	1735.5
Serpina3f	238393	12	104213345	104219957	0	0	3	7	3	0	0.151268043	0.154318664	3786	1735.5
Serpina3g	20715	12	104236455	104240888	0	0	1	2	0	0	0.154318664	0.154318664	3884	1735.5
Serpina3j	238395	12	104313303	104320686	1	0	1	2	1	0	0.149657018	0.154318664	3723	1735.5
Serpina3m	20717	12	104336709	104391433	0	0	4	20	0	0	0.122987162	0.154318664	2813.5	1735.5
Serpina3k	20714	12	104336709	104344522	0	0	4	10	0	0	0.122987162	0.154318664	2813.5	1735.5
Serpina3n	20716	12	104404845	104414192	3	0	2	24	3	0	0.141504523	0.154318664	3404	1735.5
Uroc1	243537	6	90335404	90364175	2	0	0	33	5	0	0.122398167	0.154355014	2804	1741
Arpc1b	11867	5	145114294	145114294	0	1	1	0	0	0	0.154444609	0.154444609	3891	1742
Slitrk1	76965	14	108908814	108916156	9	1	13	0	4	0	0.099915353	0.154460152	2320	1743
Dnah12	110083	14	26887420	26887420	0	0	0	1	0	0	0.154745397	0.154745397	3901.5	1746
Asb14	142687	14	26903804	26903804	0	0	0	1	0	0	0.154745397	0.154745397	3901.5	1746
Appl1	72993	14	26926867	26971519	0	0	1	1	0	0	0.154745397	0.154745397	3901.5	1746
Hesx1	15209	14	27002073	27002073	0	0	0	0	1	0	0.154745397	0.154745397	3901.5	1746
Arhgef3	71704	14	27113719	27314254	0	0	2	19	0	0	0.117754536	0.154745397	2685	1746
Xaf1	327959	11	72306243	72306243	0	0	0	1	0	0	0.154780298	0.154780298	3908.5	1751.5
Fbxo39	628100	11	72318575	72318575	0	0	0	1	0	0	0.154780298	0.154780298	3908.5	1751.5
Tekt1	21689	11	72357417	72357417	0	0	0	1	0	0	0.154780298	0.154780298	3908.5	1751.5
Mybbp1a	18432	11	72450381	72450381	0	0	1	1	0	0	0.154780298	0.154780298	3908.5	1751.5
Spns2	216892	11	72479142	72479142	0	0	0	1	0	0	0.154780298	0.154780298	3908.5	1751.5
Spns3	77577	11	72507083	72550511	0	2	4	26	4	0	0.154780298	0.154780298	3908.5	1751.5
AU016765	100043582	17	64514598	64549538	0	0	0	44	0	0	0.150174272	0.154887605	3759	1755.5
Man2a1	17158	17	64598773	64707602	0	1	19	690	3	0	0.08041175	0.154887605	1978	1755.5
Tcp10a	21461	17	7323377	7345386	2	1	6	50	4	0	0.12103588	0.155029197	2761	1757
Top2a	21973	11	98994544	99026127	0	2	51	55	2	0	0.093507952	0.155042972	2215	1764.5
Igfbp4	16010	11	99039337	99053264	5	0	9	21	1	0	0.130390005	0.155042972	2982.5	1764.5
Tns4	217169	11	99066048	99090862	6	0	19	44	3	0	0.047577972	0.155042972	1236	1764.5
Ccr7	12775	11	99151200	99151200	0	0	0	1	0	0	0.155042972	0.155042972	3923.5	1764.5
Krt222	268481	11	99235203	99245367	0	1	16	19	2	0	0.141677625	0.155042972	3408	1764.5
Krt24	75706	11	99280578	99287124	0	1	7	27	5	1	0.103647923	0.155042972	2387	1764.5
Krt25	70810	11	99315702	99324864	2	0	3	78	5	1	0.130390005	0.155042972	2982.5	1764.5
Krt26	320864	11	99330421	99339966	0	0	10	33	5	0	0.142880559	0.155042972	3456	1764.5
Krt27	16675	11	99345972	99352955	0	0	2	12	2	0	0.14969727	0.155042972	3724.5	1764.5
Krt28	70843	11	99366086	99376880	0	0	11	23	6	0	0.121926806	0.155042972	2781.5	1764.5
Krt10	16661	11	99385794	99391063	0	0	41	17	8	0	0.110361109	0.155042972	2515	1764.5
A830036E02Rik	353123	11	99415323	99423173	0	0	32	8	0	0	0.137278442	0.155042972	3184.5	1764.5
Krt12	268482	11	99415700	99423704	5	0	3	21	6	0	0.137278442	0.155042972	3184.5	1764.5
Krt20	66809	11	99428461	99440045	1	0	4	30	3	0	0.13471439	0.155042972	3100	1764.5
Zfp532	328977	18	65578189	65688886	3	1	18	437	1	0	0.091947565	0.155157586	2189	1772
Tmem200c	622645	17	68824657	68842320	0	1	16	45	5	0	0.002772047	0.155318157	215	1773
Eci1	13177	17	24424716	24436764	0	1	6	46	0	0	0.131898	0.155358955	3028	1774
D330041H03Rik	654822	17	24405749	24415692	0	0	4	10	0	0	0.117032809	0.155382023	2669.5	1775
Gm11110	100169874	17	57092775	57106511	0	0	5	34	0	0	0.115613476	0.155437819	2638	1776
Slc37a3	72144	6	39366848	39366848	0	0	0	1	0	0	0.155439618	0.155439618	3936	1777
Vmn1r53	113853	6	90223982	90223982	0	0	0	0	1	0	0.155600433	0.155600433	3944	1778
B3gnt8	232984	7	25624754	25633694	3	0	11	2	0	0	0.142683719	0.155684435	3440	1779
Tmem150a	232086	6	72356185	72356185	0	1	1	1	0	0	0.155705333	0.155705333	3948	1780
Foxo6	329934	4	120267605	120276935	1	0	0	10	1	0	0.130195698	0.155789696	2974	1781
Snhg9	73474	17	24719611	24721727	0	0	25	4	0	0	0.115426323	0.155825589	2627	1782
Pus7l	78895	15	94529304	94545488	0	0	9	29	2	0	0.155898643	0.155898643	3950.5	1783
Ptpn3	545622	4	57234892	57234892	0	0	0	1	0	0	0.156026723	0.156026723	3952	1784
Scmh1	29871	4	120403483	120529956	1	0	20	232	0	0	0.059778828	0.156164795	1516	1785.5
Slfnl1	194219	4	120530371	120530694	0	0	3	0	0	0	0.150362123	0.156164795	3765	1785.5
Agt	11606	8	124556885	124571305	1	1	8	45	3	0	0.110714301	0.156205398	2522	1787
Stard3nl	76205	13	19358016	19396981	4	2	68	351	3	0	0.134782014	0.156296625	3104	1788.5
9330199G10Rik	319466	13	19464329	19506301	0	0	26	423	0	0	0.132905283	0.156296625	3044	1788.5
Zfp644	52397	5	106559133	106699127	0	2	19	357	7	0	0.000498058	0.156506515	136	1790
Hmx1	15371	5	35392912	35399519	0	0	0	4	0	0	0.130929785	0.156647592	2998	1791
Vav1	22324	17	57277609	57320693	0	0	6	47	0	0	0.147393419	0.156732454	3646	1792
Gm12167	100503965	11	46340542	46344617	0	0	4	23	0	0	0.133498649	0.156914028	3056	1794
Fam71b	432552	11	46399307	46404467	0	0	1	2	0	0	0.156914028	0.156914028	3977.5	1794
Med7	66213	11	46438510	46438510	0	0	1	1	0	0	0.156914028	0.156914028	3977.5	1794
4930505K13Rik	75073	7	120162441	120162441	0	0	0	1	0	0	0.157155313	0.157155313	3988	1796
Serpina3i	628900	12	104261464	104262410	0	0	3	0	0	0	0.154318664	0.157261691	3884	1797
8430430B14Rik	78148	17	83996888	84009774	0	0	2	8	0	0	0.05576131	0.157339829	1429	1798
Gm765	330390	6	98236645	98344403	17	0	2	222	0	0	0.10530625	0.157355437	2419	1799
Mir7211	102466817	10	94586724	94586966	0	0	2	0	0	0	0.120530548	0.157409219	2755.5	1800
Gpr45	93690	1	42973024	43034098	2	0	0	45	0	0	0.136839174	0.157414688	3167.5	1802.5
Tgfbrap1	73122	1	43047608	43100389	16	0	4	45	1	0	0.136839174	0.157414688	3167.5	1802.5
AI597479	98404	1	43100389	43114150	1	0	0	3	1	0	0.153003602	0.157414688	3839	1802.5
Fhl2	14200	1	43131417	43178072	0	0	0	60	0	0	0.116431964	0.157414688	2660	1802.5
Rnf151	67504	17	24717369	24720015	0	0	23	3	0	0	0.115426323	0.157558524	2627	1805
Mrto4	69902	4	139347858	139353822	0	2	35	34	1	0	0.086389363	0.157640029	2081.5	1806.5
Emc1	230866	4	139350673	139378347	26	0	24	38	4	0	0.086389363	0.157640029	2081.5	1806.5
Naa25	231713	5	121395945	121441025	8	0	9	123	6	0	0.077137452	0.157647509	1905	1809.5
Erp29	67397	5	121428755	121454209	11	1	5	32	4	0	0.074605185	0.157647509	1842	1809.5
Tmem116	77462	5	121450152	121522918	0	2	17	119	0	0	0.033108802	0.157647509	884	1809.5
Adam1a	280668	5	121522918	121522918	0	0	1	0	0	0	0.157647509	0.157647509	4002	1809.5
Olfr1411	258483	1	92595892	92597216	0	0	9	0	8	0	0.148755416	0.157711845	3693	1812
Ccdc13	100502861	9	121813243	121840274	0	0	27	144	3	0	0.12954601	0.157746348	2959	1814
Higd1a	56295	9	121848663	121859906	6	4	19	28	1	0	0.138007625	0.157746348	3236	1814
Cyp8b1	13124	9	121915155	121918287	0	0	16	0	5	0	0.1526606	0.157746348	3821	1814
Gpr35	64095	1	92959131	92980123	0	0	0	3	0	0	0.013628145	0.157816727	471	1816
Rnps1	19826	17	24412764	24424776	0	0	17	18	1	0	0.117032809	0.157876859	2669.5	1817.5
Rab26	328778	17	24528801	24536004	1	0	12	9	0	0	0.139754303	0.157876859	3307	1817.5
Il2ra	16184	2	11641901	11693105	34	0	1	205	2	0	0.129379834	0.15790985	2956	1820
Il15ra	16169	2	11703361	11733709	4	4	60	198	2	0	0.117256946	0.15790985	2676	1820
Fbh1	50755	2	11744907	11779174	0	1	15	39	2	0	0.148665348	0.15790985	3685	1820
Tarsl2	272396	7	65656480	65656480	0	0	0	1	0	0	0.158003316	0.158003316	4016	1822
Prss39	21755	1	34496728	34503051	2	0	11	8	2	0	0.118621563	0.158026935	2706	1823
Elac2	68626	11	64988419	64998493	0	0	1	2	0	0	0.158145063	0.158145063	4019	1824.5
Arhgap44	216831	11	65006177	65095519	0	0	1	24	0	0	0.135207571	0.158145063	3114	1824.5
1700020N01Rik	67692	10	21591360	21608016	0	1	15	72	0	0	0.149251547	0.158284152	3712	1826.5
4930444G20Rik	114671	10	22066387	22070072	7	0	45	0	24	0	0.105263731	0.158284152	2415	1826.5
Lrpap1	16976	5	35091555	35104111	1	0	1	3	0	0	0.106493665	0.158319995	2439	1828
Trappc9	76510	15	72709919	73062988	8	0	9	893	3	0	0.073359586	0.158545342	1817	1829
Ets1	23871	9	32669041	32755840	1	0	3	40	1	0	0.133238159	0.158594038	3051	1830
Flt4	14257	11	49607784	49640080	0	0	2	2	2	0	0.141293316	0.15867702	3394.5	1831
Ncoa4	27057	14	32172557	32172557	0	0	0	1	0	0	0.158706053	0.158706053	4033	1832
A930003A15Rik	68162	16	19883079	19883079	0	0	0	1	0	0	0.158716391	0.158716391	4035.5	1833.5
Dvl3	13544	16	20524357	20524357	0	0	0	1	0	0	0.158716391	0.158716391	4035.5	1833.5
1700019P21Rik	75546	1	138877165	138878046	0	0	2	0	0	0	0.155499113	0.158788345	3942	1835
Slc12a3	20497	8	94329016	94366084	7	0	3	28	1	0	0.115879015	0.158898105	2644	1839
Herpud1	64209	8	94384512	94395072	4	0	60	39	5	0	0.109221698	0.158898105	2492	1839
Nlrc5	434341	8	94432590	94527131	4	2	35	341	8	1	0.113527695	0.158898105	2575	1839
Cpne2	234577	8	94531392	94564229	0	0	4	42	1	0	0.124896684	0.158898105	2854	1839
Arl2bp	107566	8	94668034	94668034	0	0	0	1	0	0	0.158898105	0.158898105	4041.5	1839
Cx3cl1	20312	8	94770062	94779046	2	0	8	36	0	0	0.135793022	0.158898105	3134	1839
Coq9	67914	8	94841920	94841920	0	0	0	1	0	0	0.158898105	0.158898105	4041.5	1839
2310009B15Rik	69549	1	138855845	138858326	0	0	5	1	0	0	0.146213991	0.158984072	3610	1843
Dok5	76829	2	170800669	170837554	0	0	0	2	0	0	0.158706053	0.159102506	4033	1844
Cfap100	243538	6	90425468	90429057	0	1	1	3	0	0	0.138212344	0.159261392	3245	1845
Megf10	70417	18	57131979	57297313	22	0	2	91	4	0	0.014613223	0.159503607	491	1850
Prrc1	73137	18	57363862	57392524	18	0	6	140	2	0	0.127664055	0.159503607	2934	1850
4930511M06Rik	75084	18	57374024	57554300	0	0	10	872	0	0	0.098477035	0.159503607	2290.5	1850
Gm19500	100503007	18	57403464	57412237	0	0	7	25	0	0	0.124307512	0.159503607	2839	1850
Ctxn3	629147	18	57467257	57478122	2	0	11	10	0	0	0.098477035	0.159503607	2290.5	1850
1700066O22Rik	74916	18	57506448	57535673	0	0	9	217	0	0	0.12128423	0.159503607	2767.5	1850
Ccdc192	75444	18	57531806	57719528	0	0	44	487	0	0	0.118737114	0.159503607	2709.5	1850
Gm19519	100503033	18	57688891	57792386	0	0	8	584	0	0	0.081559584	0.159503607	2005	1850
Slc12a2	20496	18	57877587	57946306	9	0	4	307	5	0	0.102567831	0.159503607	2368	1850
Lrig1	16206	6	94605014	94702075	3	2	52	655	12	0	0.127324977	0.159584425	2926	1855.5
Mir7041	102466992	6	94606677	94608339	0	0	12	0	0	0	0.159584425	0.159584425	4065	1855.5
Gemin5	216766	11	58133222	58168191	0	0	0	8	0	0	0.149885755	0.159743255	3753	1857
C130071C03Rik	320203	13	83744617	83839636	0	0	0	8	0	0	0.148210016	0.15977026	3680	1858
Gm36117	102639918	17	13006042	13039789	3	0	8	40	4	0	0.053105108	0.15978343	1377	1859
Cipc	217732	12	86945359	86964868	11	0	24	45	1	0	0.094171579	0.159820288	2227	1860
Haao	107766	17	83831348	83849912	2	3	63	88	3	0	0.056257602	0.159900324	1444	1861
Cldn9	56863	17	23684718	23684718	0	0	1	0	0	0	0.160394763	0.160394763	4084.5	1867.5
E4f1	13560	17	24444487	24470185	0	2	4	14	1	0	0.141180606	0.160394763	3382	1867.5
Traf7	224619	17	24521950	24529459	0	0	4	2	0	0	0.135680391	0.160394763	3128	1867.5
Pkd1	18763	17	24548226	24596180	7	1	12	40	13	0	0.124838098	0.160394763	2852.5	1867.5
Rps2	16898	17	24717369	24721727	0	4	41	32	6	0	0.115426323	0.160394763	2627	1867.5
Snora64	104366	17	24718835	24720944	0	0	33	0	0	0	0.115426323	0.160394763	2627	1867.5
Snora78	100306952	17	24719611	24721727	0	0	27	0	0	0	0.115426323	0.160394763	2627	1867.5
Ndufb10	68342	17	24722284	24726469	0	2	43	13	0	0	0.131898	0.160394763	3028	1867.5
Meiob	75178	17	24803779	24839710	3	0	7	288	2	0	0.108905363	0.160394763	2486	1867.5
Nubp2	26426	17	24882911	24887945	7	0	10	19	1	0	0.124838098	0.160394763	2852.5	1867.5
Mapk8ip3	30957	17	24892545	24938898	4	0	24	59	2	0	0.123173769	0.160394763	2817	1867.5
Jpt2	52009	17	24937531	24960650	4	2	2	42	0	0	0.130209749	0.160394763	2975.5	1867.5
E030030I06Rik	319887	10	22113286	22151083	7	9	61	375	21	0	0.032113594	0.160575016	854	1874
Nbl1	17965	4	139082668	139094101	1	0	21	59	1	0	0.105284101	0.160663892	2418	1875
Sgcd	24052	11	46900260	47631294	0	0	1	1605	0	0	0.008099739	0.160780458	353	1876
Tek	21687	4	94738264	94800185	0	0	1	2	0	0	0.159373817	0.161002764	4056	1877
Coasy	71743	11	101081189	101083658	0	0	2	1	1	0	0.16107877	0.16107877	4104	1878
Mir7072	102466800	8	94503064	94504980	0	0	13	0	0	0	0.115971609	0.161173427	2648	1879.5
Ciapin1	109006	8	94820301	94828654	2	0	2	4	0	0	0.158898105	0.161173427	4041.5	1879.5
Tmco4	77056	4	138971136	139059126	3	4	4	867	7	0	0.055315658	0.161231952	1422	1882
Htr6	15565	4	139061540	139077024	0	2	4	188	7	0	0.087938544	0.161231952	2107	1882
Micos10	433771	4	139101832	139133077	9	1	53	245	1	0	0.08002561	0.161231952	1968	1882
Fam161a	73873	11	23005564	23027433	0	4	43	53	5	0	0.091996826	0.161278695	2190	1884
Bms1	213895	6	118389290	118419568	0	0	1	6	2	0	0.147091551	0.161278738	3638	1886.5
Zfp9	22750	6	118462850	118480906	3	1	4	57	8	0	0.153477468	0.161278738	3852	1886.5
Ankrd26	232339	6	118501565	118564106	5	1	45	276	19	0	0.12420805	0.161278738	2838	1886.5
Cacna1c	12288	6	118587419	118980837	43	0	30	404	5	0	0.131115515	0.161278738	3006	1886.5
Slc35a5	74102	16	45139656	45160576	14	3	22	36	2	0	0.126221486	0.161288541	2895.5	1890
Atg3	67841	16	45157390	45188145	3	4	23	119	3	0	0.106246465	0.161288541	2434	1890
Btla	208154	16	45222480	45251193	2	0	15	96	1	0	0.126221486	0.161288541	2895.5	1890
Peg13	353342	15	72811520	72812305	0	0	5	0	0	0	0.148313546	0.161396541	3682	1892
Adgre1	13733	17	57358241	57481532	0	0	1	15	0	0	0.148855482	0.161544558	3699	1893
Rab11fip4	268451	11	79589601	79697691	15	1	8	471	1	0	0.008949833	0.161780257	370	1894.5
Rab11fip4os2	72218	11	79670565	79675743	0	0	10	28	0	1	0.010141828	0.161780257	395	1894.5
Ackr2	59289	9	121896409	121908408	0	1	11	24	0	0	0.1526606	0.161809982	3821	1896
Sorbs1	20411	19	40322847	40322847	0	0	0	1	0	0	0.161812441	0.161812441	4126.5	1897
Cyp2b13	13089	7	26071884	26071884	0	0	0	1	0	0	0.161818433	0.161818433	4129	1898
Flywch2	76917	17	23780557	23785776	0	0	2	4	0	0	0.161826961	0.161826961	4132.5	1899
2010300C02Rik	72097	1	37614339	37715503	0	0	5	293	7	0	0.117168594	0.161830641	2673	1900
Ppcdc	66812	9	57425608	57425608	0	0	1	1	0	0	0.162080744	0.162080744	4140	1901
Ms4a5	269063	19	11273520	11285631	4	0	23	64	3	0	0.115175665	0.162134108	2620	1902
Gm8096	666422	8	28084682	28086450	0	0	3	0	0	0	0.162276294	0.162276294	4145	1903
Hnrnpul1	232989	7	25721768	25749509	2	0	0	6	0	0	0.128936633	0.162592757	2947	1904
Snx32	225861	19	5494237	5510121	0	0	2	9	0	0	0.030710611	0.162775504	799.5	1905
Arvcf	11877	16	18361931	18361931	0	0	0	1	0	0	0.162830168	0.162830168	4158.5	1906
Mrpl13	68537	15	55543074	55543074	0	0	0	1	0	0	0.162856871	0.162856871	4162	1907
Nom1	433864	5	29432739	29457190	1	0	1	0	0	0	0.018869571	0.163136209	556	1908
Mgat2	217664	12	69183558	69185691	0	1	4	0	2	0	0.051674415	0.163342441	1336.5	1909
Obscn	380698	11	58994261	59133240	13	0	56	590	103	0	0.069088037	0.163358779	1724	1910
Dmac2	66349	7	25617430	25625466	2	4	32	36	4	0	0.146455925	0.163367081	3618	1911
Unc5c	22253	3	141580842	141722953	0	0	0	8	0	0	0.143580753	0.163578899	3488	1912
Zfp534	100503584	4	147673637	147704088	2	1	3	14	2	0	0.049677854	0.163581255	1288	1913
Gsdma3	450219	11	98638189	98638189	1	0	0	0	0	0	0.163730635	0.163730635	4202	1915.5
Gsdma2	76758	11	98656516	98656516	0	0	0	1	0	0	0.163730635	0.163730635	4202	1915.5
Gsdma	57911	11	98663033	98663033	0	0	1	0	0	0	0.163730635	0.163730635	4202	1915.5
Psmd3	22123	11	98688875	98691964	0	0	2	4	0	0	0.12659101	0.163730635	2909	1915.5
Rnaseh2c	68209	19	5600203	5606315	0	0	8	7	1	0	0.032733838	0.16374872	871	1922
Kat5	81601	19	5603797	5612202	1	0	9	10	2	0	0.162775504	0.16374872	4157	1922
Rela	19697	19	5635722	5647953	3	0	9	15	2	0	0.163630398	0.16374872	4197	1922
Sipa1	20469	19	5652819	5663482	0	1	8	14	6	0	0.145872333	0.16374872	3592.5	1922
Pcnx3	104401	19	5667062	5689974	0	2	11	11	0	0	0.030710611	0.16374872	799.5	1922
Map3k11	26403	19	5686754	5702819	3	3	15	21	1	0	0.145872333	0.16374872	3592.5	1922
Kcnk7	16530	19	5702462	5707074	3	0	7	0	1	0	0.163630398	0.16374872	4197	1922
Ehbp1l1	114601	19	5707758	5728294	5	1	46	59	23	0	0.030710611	0.16374872	799.5	1922
Znrd2	56390	19	5730579	5732708	1	0	3	0	1	0	0.16374872	0.16374872	4206.5	1922
Fam89b	17826	19	5728294	5732708	7	2	9	1	1	0	0.030710611	0.163759759	799.5	1927
Mcts2	66405	2	152687015	152687166	0	1	2	0	0	0	0.137607158	0.163824269	3214.5	1928
Pbx1	18514	1	168119368	168433057	24	0	20	922	0	0	0.050589247	0.163868762	1309	1929
Olfr1239	258972	2	89417764	89419186	0	0	3	0	2	0	0.143173402	0.164193441	3476.5	1930
Smtnl2	276829	11	72410726	72410726	0	0	0	1	0	0	0.164331678	0.164331678	4221	1931
Mmp25	240047	17	23637015	23647079	0	0	1	2	0	0	0.104658718	0.164670957	2401	1932
Pwwp2b	101631	7	139246645	139267545	3	0	4	106	4	0	0.058885033	0.164708562	1496	1933
Coq6	217707	12	84366701	84366701	0	0	1	1	0	0	0.164723949	0.164723949	4232	1934
1700048O20Rik	69430	9	121935332	121964714	0	0	8	2	0	0	0.149474752	0.164743091	3719.5	1935
Mapkapk5	17165	5	121522918	121546805	1	0	6	8	0	0	0.092726501	0.164837139	2202	1936
Mir6348	102465178	1	168489738	168490443	0	0	3	0	0	0	0.146067347	0.164850136	3606	1937
1700028D13Rik	75569	5	112205210	112209686	0	0	5	4	0	0	0.081605673	0.16489894	2006	1947.5
Miat	330166	5	112221968	112231291	0	0	7	8	0	0	0.096016595	0.16489894	2255	1947.5
Hps4	192232	5	112342133	112377717	0	1	4	12	0	0	0.038705335	0.16489894	1031	1947.5
Asphd2	72898	5	112384714	112396851	9	6	29	63	5	0	0.063467349	0.16489894	1597	1947.5
Ino80e	233875	7	126854454	126864046	0	0	2	1	0	0	0.078147007	0.16489894	1929.5	1947.5
Taok2	381921	7	126868710	126884903	0	0	4	3	0	0	0.160901135	0.16489894	4098	1947.5
Tmem219	68742	7	126895479	126924894	0	0	3	8	0	0	0.141723313	0.16489894	3411.5	1947.5
Kctd13	233877	7	126928071	126945436	3	0	10	32	1	0	0.064176513	0.16489894	1619	1947.5
Sez6l2	233878	7	126940251	126970172	1	1	16	34	2	0	0.160901135	0.16489894	4098	1947.5
Asphd1	233879	7	126945967	126950791	1	0	6	5	1	0	0.160901135	0.16489894	4098	1947.5
Cdiptos	381922	7	126973490	126977966	0	1	4	2	0	0	0.16489894	0.16489894	4238	1947.5
Cdipt	52858	7	126975900	126979519	0	3	6	6	2	0	0.077464321	0.16489894	1911.5	1947.5
Mvp	78388	7	126986949	127015076	1	0	2	47	11	0	0.074307618	0.16489894	1838.5	1947.5
Septin1	54204	7	127214938	127233506	0	1	21	29	2	0	0.077464321	0.16489894	1911.5	1947.5
Zfp553	233887	7	127231263	127237946	1	6	14	1	0	0	0.160901135	0.16489894	4098	1947.5
Gm4532	100043580	7	127232948	127233506	0	0	9	0	0	0	0.160901135	0.16489894	4098	1947.5
Zfp771	244216	7	127243357	127252516	0	0	5	5	0	0	0.160901135	0.16489894	4098	1947.5
Dctpp1	66422	7	127257036	127262182	1	1	6	5	0	0	0.16489894	0.16489894	4238	1947.5
Sephs2	20768	7	127272077	127276041	5	1	7	0	2	0	0.160901135	0.16489894	4098	1947.5
Itgal	16408	7	127294562	127333089	0	0	7	52	3	0	0.074307618	0.16489894	1838.5	1947.5
Rspry1	67610	8	94601338	94656074	0	0	2	4	0	0	0.136029191	0.165256086	3140	1958
Tnnt1	21955	7	4508164	4508164	0	0	1	1	0	0	0.165267186	0.165267186	4246	1959
Smyd3	69726	1	179149327	179519476	2	1	2	172	1	0	0.118737114	0.165407245	2709.5	1962.5
Tfb2m	15278	1	179531801	179545108	0	0	0	13	0	0	0.104205229	0.165407245	2393	1962.5
Cnst	226744	1	179545074	179626841	2	0	5	122	3	0	0.134171394	0.165407245	3085.5	1962.5
Sccpdh	109232	1	179666228	179686164	0	0	21	41	0	0	0.134171394	0.165407245	3085.5	1962.5
Kif28	383592	1	179696225	179745390	0	0	50	226	13	0	0.130315415	0.165407245	2979	1962.5
Ahctf1	226747	1	179744980	179802429	9	0	47	179	21	0	0.106078095	0.165407245	2432	1962.5
Myb	17863	10	21125250	21162596	1	1	7	69	3	0	0.070260756	0.165646696	1753	1966
Pus10	74467	11	23685024	23717917	0	0	1	4	0	0	0.152911958	0.165860637	3832.5	1967
Srrm2	75956	17	23790563	23799373	0	0	2	2	0	0	0.156966374	0.166040433	3981	1968
Zfp991	666532	4	146253402	146277746	0	0	6	15	0	0	0.076406349	0.166484916	1887	1969
Bckdha	12039	7	25631258	25660754	0	0	7	59	0	0	0.090392714	0.166498554	2151	1970
Ctps	51797	4	120540383	120543366	1	0	0	1	0	0	0.156164795	0.166611258	3955	1971
E330013P04Rik	107376	19	60143648	60159387	0	0	12	37	0	0	0.036915126	0.166634309	979	1972
Ccdc80	67896	16	45093113	45123479	0	0	1	9	1	0	0.156681411	0.166691141	3972	1976
Cd200	17470	16	45382285	45409856	9	1	17	202	4	0	0.14774305	0.166691141	3656	1976
Gm609	208166	16	45413244	45494921	1	1	4	81	0	0	0.14032082	0.166691141	3349	1976
Slc9c1	208169	16	45536263	45606988	10	0	7	160	11	0	0.133111384	0.166691141	3047.5	1976
Gcsam	14525	16	45608389	45621544	3	0	7	53	0	0	0.133111384	0.166691141	3047.5	1976
BC016579	212998	16	45630152	45650619	0	0	0	38	0	0	0.159772381	0.166691141	4070	1976
Tmprss7	208171	16	45659625	45695462	0	0	52	204	5	0	0.117677176	0.166691141	2684	1976
Efr3a	76740	15	65797000	65859184	0	0	0	7	0	0	0.041611339	0.166906316	1095	1980
Spsb3	79043	17	24884666	24889328	0	1	16	5	2	0	0.135680391	0.166912276	3128	1981
H13	14950	2	152669808	152706511	1	0	1	20	1	0	0.137607158	0.167023606	3214.5	1982
Olfr1416	259040	1	92479962	92482421	0	0	19	0	8	0	0.127938122	0.167081404	2936.5	1983.5
Gpc1	14733	1	92829954	92860463	10	0	21	116	4	0	0.127938122	0.167081404	2936.5	1983.5
Erich4	632778	7	25615153	25617719	0	0	19	1	3	0	0.143900442	0.167250553	3498	1987.5
Exosc5	27998	7	25657276	25671308	8	0	6	21	1	0	0.142683719	0.167250553	3440	1987.5
Tmem91	320208	7	25669775	25677138	0	0	2	10	0	0	0.147324145	0.167250553	3641	1987.5
Tgfb1	21803	7	25685528	25704486	0	0	5	13	0	0	0.142683719	0.167250553	3440	1987.5
Ccdc97	52132	7	25719430	25719430	0	0	1	0	0	0	0.167250553	0.167250553	4290	1987.5
Cyp2b10	13088	7	25917172	25924091	0	0	0	7	0	0	0.150132409	0.167250553	3757.5	1987.5
Tacr3	21338	3	134846948	134846948	0	0	0	1	0	0	0.167401918	0.167401918	4294	1991
Zfp992	433791	4	146448164	146469160	6	0	5	38	0	0	0.046171913	0.1674691	1196	1992
Akt1	11651	12	112654061	112676847	2	2	120	216	7	0	0.121506695	0.167479107	2774	1993
Zfp831	100043757	2	174641591	174710265	7	0	43	155	33	0	0.075666262	0.167501727	1867	1994
Cdon	57810	9	35419275	35507442	8	4	78	1004	15	0	0.054352748	0.167608665	1401	1995
Mta3	116871	17	83704373	83820908	9	0	10	234	1	0	0.045936318	0.167782112	1193	1996
Ngfr	18053	11	95569186	95589429	7	0	9	144	5	0	0.099767025	0.167913116	2317.5	2005.5
Gm13986	329496	2	117887436	118100127	0	0	0	29	0	0	0.052083243	0.167913116	1354	2005.5
Srp14	20813	2	118478467	118478467	0	0	0	1	0	0	0.167913116	0.167913116	4324.5	2005.5
[truncated: 14,379 more rows]
